# Supplementary material for: A next-generation fluorescent chemosensor for dual-mode detection of aluminium ions and DCP: a bridge between sensing and bio-imaging
Source: Royal Society of Chemistry journal article supplement (doi:10.1039/d5tc04533a), 2026-01-01
Supplement: d5tc04533a1.xlsx [file d5tc04533a1.xlsx]

## Sheet: Sheet1
	0.1	0.2	0.3	0.4	0.5	0.6	0.7	0.8	0.9	1	1.1	1.15	1.2	1.25	1.3	1.35	1.4	1.45	1.5	1.55	1.6	1.7	1.8	1.9	2	0
Al conc	2	4	6	8	10	12	14	16	18	20	22	23	24	25	26	27	28	29	30	31	32	34	36	38	40	0
337.07	69.5463	70.6059	84.7278	86.64	90.2254	85.3209	97.6192	87.0863	88.2565	114.071	88.5051	59.6446	76.9511	72.6921	74.2441	59.8226	70.8466	68.6602	64.0701	58.0637	64.435	56.525	68.6443	61.0639	57.832	46.2283
338	70.4156	72.1498	84.8477	87.3071	94.0881	86.2799	95.3706	87.2029	88.2095	111.314	84.7324	57.5604	75.7818	70.4184	70.464	60.4433	68.9102	63.6614	59.2931	54.6181	62.3237	54.7874	65.2504	56.9562	55.5965	46.7325
339.07	73.0961	74.0404	86.7633	91.5848	96.0682	86.3325	93.8709	86.9511	88.1281	107.962	82.9515	55.1631	74.2863	69.0568	66.8815	57.3766	65.5555	59.4933	59.2226	50.8103	58.814	51.9659	63.0462	53.9462	52.7931	45.785
340	74.7453	75.538	90.0727	93.5494	96.1339	86.1549	92.0294	86.702	88.9987	104.466	79.8569	54.3577	72.9426	64.9212	62.9874	58.5773	60.7227	56.4075	56.1027	48.4041	53.4543	48.6778	59.5146	50.0836	50.676	43.4997
341.07	78.2453	78.4711	94.1113	97.2968	98.4024	85.5697	89.8739	87.1919	89.3006	100.731	75.8514	53.8301	70.0986	63.3481	59.1188	56.6306	57.1479	53.3224	51.7375	43.7649	49.7371	46.7791	54.1757	46.2639	48.1	45.4287
342	80.4039	81.3969	96.8001	99.5302	101.961	87.0974	89.5342	88.072	88.4852	98.3139	75.2484	54.4742	67.7277	63.8106	56.0804	56.731	54.9436	51.0268	50.0754	42.8503	48.6432	44.0473	51.5101	43.0352	47.2773	46.7601
343.07	82.7494	84.5469	101.489	102.475	104.406	92.01	88.758	87.3352	88.3484	93.9926	74.0137	55.1147	67.674	60.1574	54.0312	54.5663	51.2169	47.747	49.6409	40.8968	47.0709	43.2212	48.5471	40.0127	46.7254	47.5704
344	85.7151	89.7752	105.617	106.166	107.837	95.2496	89.0891	88.8451	89.4831	91.9381	74.2658	55.6533	66.6875	59.7059	54.4554	56.0048	50.4647	45.5158	48.0728	40.1807	43.2554	42.4737	45.3389	39.4031	44.7895	47.3334
345.07	88.6457	93.7809	108.588	111.786	109.646	98.5128	90.8283	92.0816	90.7095	90.2327	74.8364	55.1333	64.8577	59.8704	55.1582	56.7389	48.0973	45.7281	46.661	39.3142	42.6804	41.2377	44.773	37.5349	43.7518	46.6606
346	88.9712	99.7837	110.75	114.498	109.757	99.2917	91.6894	94.9224	92.1434	89.4453	76.4153	60.077	65.4943	61.7834	54.512	59.787	45.7335	46.5123	47.5014	38.0049	41.1964	42.4223	43.8012	40.1452	45.789	46.8278
347.07	91.586	103.453	113.063	117.335	112.445	102.726	92.6623	98.8869	91.3496	89.3362	75.6535	62.7207	65.1265	62.353	55.4022	61.3222	44.6634	46.9853	46.6045	37.3731	40.5419	42.3726	44.9467	42.1202	46.7842	45.7382
348	93.9282	107.102	116.588	120.442	114.944	105.563	95.4826	101.434	94.6637	89.046	77.8974	64.4356	68.3631	65.3282	56.3394	65.3431	44.179	48.3047	47.8955	39.6615	43.3802	41.7318	44.6468	44.459	47.0396	46.7285
349.07	96.9745	112.149	119.807	123.16	118.492	108.946	95.3691	105.301	98.5604	89.5839	77.2928	67.3409	69.4321	66.9188	58.651	65.0859	45.9981	48.4859	50.8558	42.5039	43.7305	40.6611	45.3054	45.1151	47.9707	48.0893
350	100.498	116.31	122.786	124.771	120.608	112.332	100.018	109.056	101.78	92.065	78.1957	71.7999	70.9981	70.0557	59.1643	66.5531	48.3738	49.4596	51.4036	45.4954	46.1989	43.387	47.7633	49.9033	48.7423	50.2852
350.93	102.565	119.895	127.683	126.043	120.963	115.77	101.429	111.696	104.566	95.0262	80.4737	75.6777	72.252	72.8822	61.8281	70.0824	52.4355	50.4337	54.6704	46.6521	49.3114	46.8523	49.7354	53.997	51.3118	49.1071
352.03	106.692	123.438	130.982	129.749	122.615	119.197	104.432	114.871	109.789	96.9237	82.3934	80.1106	76.8361	72.8884	65.1362	73.4921	56.4119	52.1786	56.0017	48.3039	52.0861	47.6363	50.3825	55.6266	55.5631	50.2897
352.96	109.335	128.088	136.131	131.792	125.445	124.943	109.395	119.231	113.231	98.3639	86.199	84.7095	78.1545	74.2492	68.8093	74.7123	60.253	53.6932	58.2617	50.4323	54.8472	49.9455	53.6154	58.827	58.0561	51.4714
354.06	113.067	130.612	138.049	132.871	130.309	129.248	114.982	123.134	117.152	100.711	88.5343	89.7073	80.6228	76.1466	70.852	76.6882	61.9801	56.9701	63.4355	53.1702	59.0214	53.4764	57.0745	61.9803	57.2655	53.5354
355	117.052	135.881	141.784	136.338	134.205	132.363	117.832	125.884	122.779	107.433	93.0074	94.3216	85.424	77.9235	73.8215	80.7024	64.7137	60.3233	67.4559	56.0287	62.615	56.0099	59.6972	66.2531	59.7901	56.0608
355.93	119.835	140.774	146.045	139.666	137.758	135.586	122.242	128.421	124.961	110.211	96.9452	96.4014	88.3785	80.3167	77.1516	83.6365	68.2423	63.8327	69.0374	61.6044	67.6761	58.9382	61.6402	68.9744	62.103	56.7978
357.03	122.929	145.691	149.404	144.386	139.837	137.121	123.971	130.61	128.007	115.992	98.9816	99.3639	91.8901	85.985	78.0374	87.2997	69.8978	67.6411	71.5286	65.1116	72.0985	59.8218	63.7197	73.9561	64.7976	57.1332
357.96	123.588	148.361	148.539	147.089	140.261	138.075	129.101	131.382	129.793	120.146	102.656	101.64	94.3024	88.3361	81.3974	90.0073	74.2459	71.1965	75.4107	66.6279	75.5809	62.5367	64.5293	77.5007	66.8136	58.748
359.06	125.468	151.735	151.044	150.654	144.062	139.305	134.109	130.297	132.031	124.09	107.47	103.175	97.5688	90.491	81.6109	92.0303	78.4147	73.3415	77.4074	71.6351	78.3885	64.8341	67.9727	82.4354	70.8257	60.0662
360	128.768	155.373	153.355	153.133	146.399	143.837	139.928	134.004	134.781	128.992	109.209	106.216	101.711	92.5761	82.6881	93.5587	81.711	76.8709	80.4708	75.5217	81.0788	68.2725	69.8135	85.5892	72.6686	63.1092
361.07	130.579	155.87	156.57	155.181	145.999	146.27	144.792	135.794	136.516	133.71	111.799	108.476	107.19	95.9772	83.6629	94.2134	84.1259	80.918	84.2191	79.7751	84.9147	72.2367	70.7543	87.058	75.6446	63.2668
362	132.27	157.825	158.167	156.057	150.185	148.652	148.75	139.573	139.854	134.488	114.241	110.399	113.098	100.131	87.4818	98.1854	88.2037	84.4256	82.6824	83.6142	85.8595	74.1607	73.5384	89.8934	78.1537	63.5212
363.07	134.433	157.899	160.393	158.09	152.645	151.585	151.014	143.262	139.851	137.597	117.833	112.359	117.165	104.867	91.2945	99.99	89.6573	87.862	85.1104	87.2724	89.9973	75.1205	75.4282	92.0291	79.8695	65.3995
364	134.277	157.287	160.512	163.034	155.699	152.376	156.382	147.446	142.841	138.695	122.591	113.44	118.791	108.462	94.1859	101.428	92.167	90.9269	87.4307	89.3404	91.6444	77.476	78.731	93.9016	83.7175	67.4174
365.07	136.722	158.244	161.444	163.309	156.155	156.089	159.23	149.189	146.064	143.207	123.003	114.221	118.722	110.662	95.2492	100.644	93.6014	93.9425	91.0043	92.7033	93.8251	80.8217	80.9974	96.3564	86.1978	70.8612
366	137.264	160.81	162.822	166.444	157.451	157.674	162.084	150.326	147.275	145.841	125.532	116.795	120.813	113.412	96.2223	104.535	97.0033	97.7512	91.079	96.0541	96.9631	82.3768	83.562	98.725	89.0624	72.4116
367.07	135.451	161.677	163.366	168.655	161.15	158.933	160.584	153.869	147.616	148.695	128.752	120.241	123.32	117.761	97.4817	105.524	98.6018	98.2741	92.6545	98.0032	100	84.0834	85.62	102.265	91.5344	73.574
368	135.526	160.972	164.85	168.29	163.605	158.223	162.42	155.525	149.783	152.467	130.328	123.55	126.825	119.635	99.7921	106.367	99.7547	102.409	94.6877	98.938	103.03	85.179	88.8087	103.584	92.0037	75.8517
369.07	135.098	160.884	166.304	167.916	167.383	159.945	165.754	156.815	150.857	154.207	131.517	125.474	128.129	121.472	103.467	108.658	100.149	104.989	96.3149	104.153	105.018	88.1238	90.6707	105.422	93.5166	79.1253
370	136.545	158.013	165.55	167.089	167.77	160.405	164.617	157.306	152.339	156.596	130.824	126.089	128.855	121.893	105.264	108.259	101.856	107.489	97.6641	104.535	105.854	91.8504	93.3094	105.961	94.208	79.1005
371.07	136.492	158.028	166.318	165.79	169.752	159.245	164.793	155.368	152.647	160.297	131.194	126.382	129.536	124.024	107.841	109.112	102.919	108.634	100.767	106.137	109.028	94.9936	96.4914	107.927	96.4908	81.0465
372	134.644	156.978	167.259	166.159	169.585	160.119	162.414	155.785	153.811	162.422	132.944	125.891	131.614	125.29	111.346	112.078	102.551	110.366	103.144	109.022	111.299	96.6085	97.6888	108.797	97.3366	82.9595
373.07	133.008	154.397	168.169	167.519	167.972	158.99	162.646	156.086	153.347	162.161	134.036	126.208	132.431	125.521	111.331	112.705	102.515	112.627	106.739	111.105	112.281	97.4448	99.791	109.285	98.0109	85.1916
374	131.943	151.338	167.572	166.999	168.308	157.631	160.266	155.349	151.859	162.277	132.896	128.498	131.759	124.162	113.936	114.813	101.861	115.823	107.648	112.475	112.231	98.0804	99.9191	110.344	99.6037	86.478
375.07	129.741	149.417	165.547	166.59	169.368	157.765	158.986	156.718	150.569	160.338	133.928	130.546	131.273	125.083	115.529	113.088	103.683	117.631	109.926	112.762	114.028	98.3347	102.744	112.653	99.2703	88.6836
376	125.595	147.618	163.992	166.538	169.756	158.468	157.901	157.207	151.626	158.638	136.827	131.719	133.325	126.353	118.342	113.065	104.229	118.185	113.218	117.144	116.153	98.1377	105.299	113.002	100.535	89.4182
377.07	125.741	146.927	163.746	165.709	169.341	157.977	156.131	154.998	151.027	156.778	136.619	130.509	133.676	126.617	119.96	113.984	103.538	120.008	113.856	117.644	113.932	100.291	106.639	112.765	101.844	88.7822
378	126.469	145.802	162.135	164.916	167.01	154.03	153.339	154.926	152.87	152.313	136.616	131.706	132.628	128.19	121.183	114.789	103.938	122.685	115.816	119.021	112.616	100.74	108.448	114.156	103.555	89.5181
379.07	125.604	144.173	161.12	163.527	165.559	152.257	150.97	153.811	153.229	149.321	134.29	131.074	133.252	128.906	119.781	113.595	105.317	124.338	115.218	117.365	114.107	102.597	109.269	115.604	104.726	90.7159
380	123.029	142.211	158.653	160.479	164.667	152.458	148.399	153.102	152.807	147.028	132.676	133.472	134.317	130.081	118.857	113.949	105.504	122.923	117.008	119.095	114.068	104.47	110.3	115.263	106.554	92.2081
381.07	122.61	138.955	156.041	156.271	164.688	151.765	143.913	153.992	151.967	145.375	129.077	133.774	134.321	128.071	119.338	112.875	105.324	121.451	117.672	118.536	114.661	105.433	110.212	113.951	107.394	93.2296
382	123.65	137.498	152.874	151.581	163.414	150.806	142.327	153.25	152.394	141.219	129.374	133.479	134.82	128.853	118.637	113.289	106.648	122.306	119.264	120.065	114.135	103.738	111.041	114.12	105.945	94.7866
383.07	121.291	135.035	150.528	147.783	160.995	149.902	138.21	153.049	151.681	141.202	128.694	132.067	133.347	128.697	117.907	111.27	109.101	120.782	119.441	117.407	113.888	104.943	114.214	113.335	108.198	95.5162
384	119.149	133.011	148.485	143.831	158.45	147.734	135.212	150.912	151.696	138.628	128.389	131.371	132.046	127.818	117.902	112.684	110.071	120.605	118.895	115.344	114.284	107.934	117.53	114.154	107.965	94.9235
385.07	118.074	130.153	148.685	142.376	156.046	145.228	132.998	148.443	150.171	136.107	127.213	131.03	129.661	124.021	119.27	112.618	113.512	118.548	120.419	114.168	112.284	108.603	118.77	114.087	106.865	94.1969
386	119.623	128.517	145.058	141.454	153.955	143.075	131.615	146.573	148.083	133.275	127.808	130.889	130.993	120.737	117.418	111.997	114.115	117.438	120.927	114.231	112.729	105.732	120.636	114.49	106.667	93.3516
387.07	118.508	126.038	142.977	136.601	152.735	138.524	130.07	142.525	146.932	132.693	126.914	129.093	129.45	120.626	116.868	111.73	116.138	115.341	122.585	114.314	112.493	109.612	121.945	115.115	104.735	94.6012
388	119.198	125.156	138.288	134.747	151.514	135.214	126.369	140.592	145.439	131.402	124.284	126.854	126.981	118.454	115.974	110.371	116.889	114.932	124.217	114.09	113.104	110.55	122.094	115.109	104.018	93.4066
389.07	117.938	125.073	135.899	132.846	148.408	133.656	124.938	136.79	143.011	130.156	122.998	124.693	123.651	117.54	114.185	112.386	115.627	113.468	123.947	113.837	113.651	108.281	120.689	115.432	106.401	90.0971
390	115.719	123.752	132.941	131.762	145.369	130.276	123.68	135.651	139.846	127.28	121.666	121.707	121.318	119.257	113.635	110.293	115.635	114.872	123.292	115.607	114.472	107.081	120.486	115.4	106.215	88.2094
391.06	114.235	123.366	130.863	128.993	140.16	125.71	121.41	134.245	138.166	126.264	121.803	119.488	119.536	117.2	111.326	110.102	117.171	114.455	123.196	112.364	111.938	108.23	121.378	114.849	106.806	87.1284
391.96	110.876	121.942	129.465	126.453	137.212	126.158	121.631	134.277	135.654	123.814	122.118	115.906	118.865	115.03	111.65	109.443	119.011	112.006	120.882	111.899	111.977	108.883	120.374	113.442	106.699	86.4011
393.03	111.177	120.557	129.353	126.066	134.927	124.582	120.448	132.833	133.984	122.437	120.888	114.296	119.501	114.013	110.561	107.62	118.147	110.282	119.721	113.753	110.514	109.981	120.876	112.272	107.951	85.9364
393.93	112.502	119.517	125.807	121.112	131.219	124.888	119.896	133.779	131.776	120.421	117.296	114.584	117.715	110.284	110.03	106.919	117.422	110.057	119.058	111.893	110.115	112.638	120.788	111.059	109.374	84.2645
395	111.6	117.636	123.28	118.105	129.648	121.947	119.951	132.2	127.835	119.652	116.665	113.666	118.514	110.663	111.494	106.808	116.675	110.739	117.322	111.636	112.366	113.728	119.365	109.705	109.708	82.1904
396.06	110.486	116.854	119.724	115.867	130.377	121.047	117.111	132.355	124.851	116.929	118.161	113.872	116.842	110.564	112.378	106.793	117.523	111.818	114.899	109.961	112.745	112.743	122.894	109.262	111.96	81.5457
396.96	110.11	115.446	119.954	114.349	127.815	117.917	116.665	131.036	120.106	115.518	118.667	113.643	113.86	110.751	113.489	105.494	117.174	114.353	118.149	110.039	116.193	111.325	124.656	111.971	110.714	82.7892
398.03	110.48	114.685	117.732	111.976	125.854	114.632	116.734	130.083	118.894	115.566	118.026	115.078	113.092	109.425	112.179	107.605	117.364	116.811	120.859	111.968	118.002	111.814	125.615	114.357	113.013	82.1019
398.93	110.012	115.455	118.213	107.691	124.096	113.231	114.194	128.637	115.943	117.302	117.846	117.512	112.421	108.971	109.572	108.072	118.281	118.046	123.071	113.882	120.254	113.053	126.55	117.114	111.492	81.9467
400	107.623	113.232	118.52	109.023	120.563	113.46	112.452	128.817	113.489	117.347	118.409	120.635	114.599	109.926	109.456	111.241	120.314	120.437	125.587	114.593	121.811	113.794	128.699	118.566	114.423	81.7413
401.07	105.131	110.312	116.384	107.48	120.123	113.497	110.666	127.007	114.828	119.784	120.762	121.276	116.201	111.307	109.942	112.763	122.283	122.067	125.647	115.679	126.673	117.133	131.295	122.845	116.415	82.8079
402	102.227	107.683	115.09	105.231	119.087	113.332	113.599	123.866	116.192	119.525	121.224	120.631	117.89	113.724	114.362	114.836	123.535	125.553	129.367	121.396	130.685	119.758	136.072	127.205	118.883	82.6991
403.07	98.9248	106.721	112.66	104.905	117.343	113.305	112.899	122.144	117.197	119.973	123.098	121.449	119.71	114.583	118.286	120.173	123.853	127.974	132.279	126.264	134.907	123.694	140.684	131.588	123.715	82.93
404	97.5832	102.492	111.602	105.83	117.482	110.971	111.39	120.634	117.6	122.025	124.47	124.542	120.198	119.579	119.569	122.87	127.095	133.105	135.119	130.66	138.769	127.968	144.699	139.747	127.344	82.2311
405.07	93.7988	103.096	111.299	107.136	118.988	111.226	110.842	119.235	119.106	123.092	128.995	127.813	124.478	123.891	124	128.143	131.993	138.234	140.776	136.273	146.195	131.728	150.712	146.102	135.137	84.3946
406	91.8432	98.5008	112.216	107.92	117.749	112.476	111.93	120.13	121.079	124.446	132.504	130.559	129.224	128.846	127.83	133.334	136.579	146.087	145.563	144.259	153.245	137.288	156.237	152.685	143.784	85.179
407.07	89.5649	96.0432	112.019	108.419	118.495	113.35	113.429	120.751	121.626	123.362	134.133	135.455	134.827	132.511	134.149	136.494	141.297	153.773	155.185	153.194	162.057	145.093	164.006	161.064	152.975	84.8387
408	87.8727	95.0585	111.652	108.772	119.525	116.307	110.681	121.351	123.875	124.896	138.606	141.23	140.226	137.613	143.224	140.626	147.817	161.226	163.932	163.829	170.133	153.991	173.633	171.469	162.713	83.8834
409.07	84.5711	95.9368	112.084	109.852	120.446	117.637	113.642	122.546	127.764	125.986	143.363	145.063	148.565	146.071	148.186	149.027	156.155	169.6	173.772	175.159	179.644	164.819	185.883	182.584	173.77	84.2437
410	82.3105	93.599	114.169	112.158	122.497	118.668	114.334	124.382	132.983	128.722	148.857	151.439	156.427	154.487	158.404	157.734	165.07	180.543	182.617	188.976	188.751	178.191	198.119	192.322	186.251	85.5841
411.07	82.3177	93.1814	113.673	113.168	123.429	119.285	117.445	125.998	134.739	132.949	152.436	156.299	162.757	160.966	165.123	167.789	174.347	194.777	197.187	204.124	199.747	192.669	212.086	204.171	200.285	85.5608
412	80.6567	93.3011	110.987	114.16	124.283	120.375	117.497	128.552	139.234	134.295	159.37	164.832	171.046	167.936	174.519	176.72	185.78	206.082	211.121	218.805	215.243	204.853	225.877	222.43	214.412	87.8816
413.07	79.0161	92.5956	110.753	115.621	126.537	123.722	121.523	132.123	141.273	140.431	164.288	170.829	180.116	177.402	185.928	187.688	196.311	217.395	223.436	232.541	232.841	221.151	242.106	238.067	230.086	88.6935
414	78.5577	92.1903	110.438	118.312	129.464	126.474	124.539	138.827	143.767	144.888	173.488	179.482	190.127	188.657	196.784	201.283	209.375	230.261	240.017	247.61	248.021	238.181	261.789	253.317	250.513	90.0905
415.07	77.8404	92.1265	109.554	118.173	129.923	126.562	125.718	142.311	148.099	151.091	180.134	188.026	201.504	198.105	209.361	213.556	219.947	246.441	252.383	262.346	262.807	256.853	279.384	270.281	270.509	88.8971
416	78.6101	91.6532	110.08	119.146	131.508	128.954	131.536	147.037	152.635	157.669	188.346	197.253	212.108	208.427	223.186	228.599	234.84	265.099	267.717	279.116	279.807	275.657	299.059	286.292	291.207	89.6739
417.07	75.3622	91.3062	109.907	121.775	133.021	131.647	133.515	149.983	157.816	167.066	196.493	207.57	224.701	219.45	238.17	243.24	250.502	283.079	287.538	297.062	297.041	300.612	320.017	304.015	314.042	90.6588
418	75.3781	92.581	110.94	123.942	137.069	132.789	139.629	156.738	161.932	174.235	202.26	215.471	236.152	230.191	252.141	263.109	266.906	303.454	305.018	317.274	316.909	319.543	337.615	324.565	333.962	89.8732
419.07	76.4258	92.8085	109.923	125.538	138.392	134.095	143.743	161.924	167.999	181.409	210.459	225.098	247.549	243.844	265.838	280.165	283.931	320.341	322.868	339.333	336.179	339.462	360.013	346.035	356.433	92.7082
420	77.2627	93.0494	107.4	126.495	140.753	135.407	147.199	169.444	173.606	191.55	217.76	236.999	261.685	259.077	280.492	297.963	298.379	340.53	341.686	361.1	360.048	362.089	378.666	369.55	379.615	91.7011
421.06	77.062	94.3463	107.835	126.959	144.239	139.031	151.828	173.564	179.858	199.085	224.349	246.25	274.462	274.371	295.825	312.896	317.247	360.146	360.827	383.567	381.323	386.444	401.151	389.808	401.648	91.0902
421.96	78.3833	95.8722	108.609	130.173	146.802	145.83	157.698	180.376	186.482	207.225	234.287	257.162	286.213	286.727	312.559	329.853	335.293	381.351	382.118	406.364	403.491	408.939	422.921	413.511	422.251	89.3387
423.03	79.2604	96.6741	108.034	132.492	150.155	149.17	163.065	183.878	191.521	216.397	245.36	269.908	295.939	300.504	328.862	348.292	349.855	403.267	401.248	427.694	428.468	432.261	444.433	440.037	443.862	89.0768
423.93	79.7339	98.6132	108.115	134.529	151.999	151.19	169.707	189.809	197.639	226.386	255.624	281.982	310.122	312.702	345.628	365.914	370.189	423.554	420.426	450.986	446.815	457.667	467.057	462.941	466.277	88.738
425	80.4849	100.929	107.995	133.794	154.484	153.402	176.862	196.355	207.323	236.053	265.079	293.235	326.211	325.562	358.217	381.456	387.691	439.992	441.32	473.247	464.973	481.877	489.555	486.951	492.381	87.9438
426.06	79.5022	101.762	107.485	134.102	159.893	158.455	181.326	202.233	213.215	242.573	272.798	305.79	339.568	337.74	374.775	399.218	404.05	456.323	461.705	495.871	490.928	502.31	508.646	510.817	515.749	87.6218
426.96	83.4432	102.392	105.833	133.467	163.52	161.102	186.636	205.785	220.777	251.896	280.773	318.628	350.935	351.252	388.811	416.746	423.488	476.167	482.24	515.741	512.66	524.506	529.244	533.024	538.766	88.2733
428.03	86.3857	103.733	107.612	131.566	166.747	165.933	189.517	210.705	225.101	260.801	290.565	329.407	360.485	365.234	404.281	433.324	438.362	497.881	504.011	534.747	534.925	547.249	549.656	554.369	560.313	87.0379
428.93	86.538	103.194	111.683	131.455	172.26	166.622	194.677	216.998	231.012	269.48	301.485	341.988	375.745	377.971	421.175	447.528	454.25	518.582	526.534	555.68	558.328	566.505	569.704	572.044	583.499	88.0424
430	87.9541	103.24	113.305	132.198	174.393	169.786	199.035	222.967	236.463	274.894	312.895	351.691	387.165	392.986	433.021	461.664	471.255	534.889	544.094	572.111	576.239	586.381	587.209	593.294	603.425	88.6049
431.06	88.7468	103.585	114.875	132.275	176.057	171.581	205.164	229.746	243.061	281.628	320.968	363.887	397.423	406.354	445.922	475.439	485.402	552.082	562.707	589.792	593.223	604.685	603.672	617.677	621.306	91.7022
431.96	89.2407	104.369	113.748	133.745	179.223	174.208	209.366	235.565	253.139	290.419	329.915	373.928	409.318	420.169	456.389	490.755	500.03	569.307	578.87	606.241	610.002	624.816	617.679	636.124	643.395	90.1438
433.03	88.3413	105.557	115.051	134.703	181.759	178.163	212.197	241.894	261.666	296.31	337.895	385.988	418.807	435.636	468.175	501.963	514.528	583.436	597.695	622.495	630.381	641.82	635.576	651.75	657.655	90.3375
433.93	88.2338	105.438	114.394	136.355	181.753	182.222	216.852	244.231	269.891	303.549	344.77	394.452	427.403	448.339	480.862	513.454	526.861	600.087	612.024	637.002	644.799	656.296	650.914	669.995	677.497	91.4588
435	88.7814	103.514	115.916	136.03	186.646	185.435	221.035	246.959	277.509	311.878	354.139	402.492	435.279	460.028	494.357	523.72	538.369	613.145	624.155	652.088	659.85	673.657	664.737	687.492	692.693	92.0542
436.06	88.0882	103.317	120.772	136.178	190.183	189.624	225.76	252.471	283.531	314.373	360.289	411.499	443.875	472.875	507.469	531.868	547.76	624.955	637.661	662.872	672.79	685.986	679.629	700.464	708.195	91.4404
436.96	90.9315	105.259	122.978	138.503	192.94	193.478	226.802	255.02	289.956	319.968	366.183	422.78	450.301	481.979	514.926	540.901	556.458	637.395	648.929	675.059	682.291	698.973	691.256	710.13	723.647	93.1552
438.03	90.6601	103.373	126.305	139.594	195.933	196.727	226.742	257.281	296.022	323.568	372.222	429.56	455.206	494.216	521.924	546.047	568.21	647.172	658.516	682.174	691.582	710.177	702.498	723.654	734.369	91.4413
438.93	90.2199	104.86	127.752	139.089	196.907	198.843	230.274	263.004	299.959	327.121	377.886	435.841	462.806	503.851	532.527	553.511	579.951	655.52	668.05	691.635	705.05	719.943	713.317	728.748	747.88	93.3111
440	89.4031	105.736	131.008	141.665	197.49	204.949	234.269	265.281	303.87	330.939	380.842	442.341	467.137	512.888	538.657	559.275	589.605	662.853	676.082	701.414	716.55	731.608	720.533	739.931	756.031	92.3979
441.07	89.1048	107.471	131.268	143.478	198.797	207.499	236.606	270.31	307.554	334.277	384.78	446.078	472.806	519.501	545.562	566.426	598.492	666.009	687.038	711.785	728.893	740.79	727.311	747.241	764.846	91.4334
442	89.2401	107.142	132.031	145.857	200.017	210.977	240.336	273.943	310.415	338.632	392.506	450.926	477.781	526.253	551.185	573.317	607.198	671.426	696.097	719.827	734.444	748.858	739.56	755.299	773.243	91.6598
443.07	87.5502	109.023	135.051	146.242	201.625	212.376	241.317	278.858	314.318	342.844	395.154	452.836	482.341	533.977	555.095	578.772	616.515	682.579	698.348	724.548	739.834	752.829	748.446	761.655	778.626	92.4369
444	89.9158	106.921	136.312	146.706	200.888	214.62	241.545	283.406	318.938	345.54	399.172	457.585	486.282	537.131	561.696	581.555	622.076	686.694	705.172	730.315	745.277	758.203	758.292	770.116	783.899	92.0813
445.07	89.8944	110.673	137.758	148.407	199.735	216.126	245.22	286.001	321.394	349.449	405.506	457.647	491.224	540.711	565.669	585.436	625.673	691.396	711.707	735.126	751.701	763.249	762.344	776.703	790.382	92.1897
446	91.9838	112.357	139.224	146.89	199.59	218.405	245.473	289.888	322.897	349.836	408.904	460.153	497.852	543.818	570.793	589.844	631.722	694.227	711.122	740.036	752.546	765.569	768.703	782.834	794.522	91.5578
447.07	92.5101	113.383	140.067	148.747	197.115	219.986	248.167	293.45	322.503	351.533	411.831	461.346	503.019	546.387	574.42	594.068	637.895	699.449	709.041	744.18	754.924	766.428	777.356	782.722	799.589	90.8874
448	93.1533	113.585	138.692	150.06	195.3	219.262	248.094	297.217	324.755	353.554	417.874	467.075	508.728	546.137	575.789	594.289	642.474	703.369	711.063	746.609	756.238	770.102	782.886	785.043	804.708	92.2124
449.07	92.3074	112.931	138.299	150.169	194.47	220.182	248.56	297.926	327.338	358.174	417.213	469.671	514.423	544.109	576.485	595.564	643.044	708.923	711.457	747.879	758.897	772.639	784.464	787.522	804.086	91.0735
450	91.2679	111.268	139.447	151.979	193.055	220.263	250.554	299.48	328.676	362.79	419.801	472.088	519.195	542.296	575.925	598.15	649.882	713.458	713.018	751.556	762.502	772.706	786.219	786.537	804.838	92.5104
451.06	89.7646	110.377	139.715	149.903	193.344	221.794	249.21	301.159	327.857	363.472	422.525	473.146	520.609	543.337	573.777	599.51	651.658	711.856	712.579	755.028	763.185	771.452	786.586	786.674	801.835	90.3502
451.96	90.1212	109.087	140.585	150.945	190.778	220.027	250.788	303.853	328.021	365.923	421.772	471.995	521.233	541.035	571.279	603.812	653.151	711.255	711.613	757.658	765.336	764.821	786.815	789.45	799.083	89.0426
453.03	90.6786	106.176	140.301	149.485	187.421	220.508	247.701	302.066	329.35	367.898	427.428	475.197	523.02	540.188	570.951	601.135	655.306	706.088	712.702	760.941	762.39	766.133	788.018	786.094	794.318	90.8419
453.93	91.2364	103.12	139.581	152.183	187.352	220.779	247.402	300.333	328.842	369.963	427.612	477.016	525.249	536.046	569.486	598.75	653.292	704.027	711.527	760.754	762.934	762.788	784.765	786.097	787.882	87.2101
455	91.9931	102.583	139.277	153.233	187.354	222.272	249.634	296.84	327.856	367.522	428.232	475.154	523.466	530.093	567.261	597.809	651.778	698.832	711.188	760.182	761.715	757.538	787.08	784.209	783.048	87.7099
456.06	90.4981	102.349	137.594	153.282	184.761	222.36	250.739	295.937	327.132	368.704	430.542	474.975	519.775	522.917	565.402	597.153	644.332	694.218	710.036	755.171	756.956	751.566	781.612	784.072	775.661	85.914
456.96	89.1712	102.347	136.394	151.77	183.246	218.394	251.926	295.594	325.292	367.86	429.622	472.31	519.087	516.459	562.115	594.496	640.419	690.068	705.358	752.352	755.538	745.545	778.182	779.066	770.426	83.4887
458.03	86.7541	99.8493	136.076	148.914	180.108	216.047	252.914	293.73	323.582	365.783	426.579	468.42	521.109	508.865	557.953	592.867	636.461	681.688	705.256	752.03	747.693	740.048	773.224	772.638	763.955	82.1694
458.93	86.3979	98.6014	135.008	147.184	180.826	216.245	253.267	293.088	322.232	363.389	425.917	463.135	519.638	505.082	552.797	588.374	626.911	673.552	702.418	747.961	741.839	734.516	764.526	765.305	758.851	82.1565
460	84.5733	96.6509	134.526	146.668	177.834	216.165	251.617	290.858	316.132	359.273	425.075	459.733	513.156	497.313	550.032	587.07	622.685	666.936	699.019	741.942	739.662	727.874	756.035	759.444	750.409	80.7714
461.06	85.2747	95.4222	133.006	147.511	174.909	215.795	249.961	288.26	313.691	358.665	422.095	455.507	508.423	495.212	545.854	582.149	618.267	662.765	693.99	735.715	731.736	718.992	748.014	750.969	742.928	79.427
461.96	84.0007	93.2187	134.736	145.844	172.965	215.242	247.597	286.92	309.391	353.91	420.158	451.759	505.104	487.993	543.518	575.201	605.515	657.753	689.704	729.435	725.713	711.614	739.223	742.356	737.077	77.0713
463.03	82.7691	92.3008	133.212	144.403	171.214	214.269	248.582	285.077	306.343	350.902	416.79	446.172	502.832	480.709	535.484	570.364	596.65	650.307	682.704	723.167	718.283	702.119	728.499	731.609	728.398	76.1084
463.93	80.8608	90.329	130.885	144.843	167.475	212.048	246.742	282.88	302.803	346.787	412.273	438.798	494.213	480.151	527.661	563.717	587.033	642.095	672.947	710.403	705.427	693.58	715.66	723.266	717.333	74.9155
465	79.0883	88.49	128.815	143.746	166.909	208.58	246.149	280.645	300.147	342.01	407.007	436.109	486.779	474.68	521.751	557.867	575.809	635.988	667.466	703.375	693.663	681.243	704.163	712.743	709.721	73.5532
466.06	77.8745	86.0017	126.51	141.658	166.695	206.04	242.824	276.005	296.558	337.906	399.75	429.283	479.56	470.284	513.396	552.175	564.513	628.469	660.608	693.836	686.068	670.844	692.015	698.648	701.416	71.282
466.96	76.9887	84.1332	127.211	139.821	164.358	204.415	239.62	272.124	290.65	334.467	392.896	425.43	471.31	463.802	507.244	544.223	554.885	617.931	651.374	682.964	676.416	661.601	682.821	685.618	689.241	70.9055
468.03	75.1562	81.6788	125.154	137.99	162.321	200.88	237.449	264.628	284.074	331.173	387.828	421.258	460.212	457.169	500.066	537.512	543.978	606.294	637.629	673.155	660.616	650.892	671.451	675.236	678.352	68.9032
468.93	72.86	79.1318	126.006	136.888	161.844	198.576	236.003	260.78	278.389	325.746	381.261	414.596	450.524	449.283	493.9	527.406	532.066	596.237	624.877	660.58	649.113	641.349	660.615	659.022	666.479	66.6974
470	71.718	80.1623	123.812	137.446	160.792	198.522	234.756	255.744	274.053	317.442	373.877	410.436	439.485	444.521	483.272	520.571	519.915	584.859	611.017	645.728	638.35	628.476	649.301	644.142	654.262	65.8837
471.06	71.5353	79.1398	120.647	138.372	158.98	199.106	229.857	251.032	269.199	314.348	368.631	404.466	426.962	440.318	474.752	514.835	509.148	574.659	600.548	633.505	624.149	614.162	632.485	628.117	641.691	64.2363
471.96	69.082	76.4399	120.405	136.458	158.623	194.894	225.149	246.442	265.352	307.933	359.817	396.87	416.152	437.576	468.229	504.737	501.075	562.169	586.901	617.693	614.76	601.609	619.336	615.534	626.663	61.6337
473.03	67.5728	75.9729	118.319	134.88	155.951	189.872	224.197	240.911	259.448	301.146	350.538	389.264	406.209	431.484	461.639	496.225	492.569	552.186	575.247	607.916	604.811	589.299	604.486	603.965	614.042	61.7757
473.93	68.4157	75.4883	115.958	134.208	155.694	190.282	219.687	235.759	256.594	295.179	344.095	380.394	396.185	425.449	450.92	488.55	483.525	544.594	563.026	592.176	592.743	579.993	590.919	591.285	598.911	58.9389
475	66.5929	73.1445	113.595	130.567	154.466	186.281	214.862	232.659	251.886	290.844	336.604	371.429	389.092	416.929	443.291	480.049	472.515	532.416	550.613	579.131	578.188	568.172	578.768	575.617	587.126	57.4492
476.06	64.8917	71.7653	112.146	126.091	154.405	184.541	210.514	228.079	247.926	283.245	329.324	363.467	377.301	411.601	432.325	469.583	463.028	524.996	536.563	563.869	562.597	553.917	571.362	565.215	572.771	56.2537
476.96	63.5578	71.0919	111.863	123.141	151.786	181.831	202.976	224.68	244.236	276.475	323.482	352.811	367.298	404.709	423.789	459.621	453.393	515.195	521.347	547.751	547.246	540.874	559.985	554.116	555.928	55.4753
478.03	63.7137	69.8176	107.889	121.464	148.397	179.249	200.688	219.88	240.627	271.131	315.738	346.555	361.491	397.524	417.243	449.334	443.45	501.317	509.332	533.401	533.373	529.595	548.672	544.822	544.997	52.7148
478.93	60.6531	71.3766	107.238	119.476	147.584	176.65	196.955	214.776	234.677	267.269	310.133	338.87	353.184	392.201	408.782	438.696	435.293	493.401	493.717	519.162	519.734	517.405	534.947	531.624	535.509	51.8953
480	59.7735	68.9258	103.594	115.473	144.428	172.454	193.075	210.969	230.183	260.938	300.918	331.599	344.855	383.071	397.766	428.163	430.756	482.526	479.091	509.269	505.425	502.82	526.413	518.878	522.056	51.1236
481.04	58.7298	68.4608	99.7651	114.449	139.464	168.353	188.609	206.057	224.936	255.966	294.661	326.531	336.079	374.5	389.211	417.699	425.473	471.421	464.789	492.086	495.701	487.702	516.359	507.049	509.149	50.5103
481.94	59.3841	66.4738	97.7025	110.17	137.321	164.41	184.435	200.568	222.899	251.201	289.257	321.028	328.079	366.016	375.982	403.591	417.002	457.065	455.742	475.857	484.929	479.296	503.197	497.119	496.266	49.2232
482.98	58.8692	63.7329	99.3433	109.166	135.361	163.492	181.621	194.399	218.8	248.139	280.382	311.525	319.182	357.797	365.105	396.06	408.284	445.579	443.893	461.831	474.634	465.769	488.303	482.972	483.089	47.8956
484.02	58.3377	61.505	98.7178	106.206	130.711	160.218	178.98	188.06	212.507	244.23	275.123	304.96	310.283	349.641	352.096	384.853	400.371	431.417	431.682	448.931	462.508	453.632	475.383	468.47	469.729	47.6728
485.07	58.383	59.5145	96.959	101.068	130.04	156.538	175.696	184.142	205.848	237.956	269.116	295.792	302.36	341.867	342.197	374.762	389.575	418.673	421.578	434.045	449.343	442.619	466.05	458.483	455.986	47.0403
485.97	56.5677	60.1803	93.3256	100.732	125.992	151.565	172.676	179.54	201.156	234.006	261.451	288.028	295.786	329.863	333.823	364.945	380.007	404.878	412.033	420.722	436.2	429.228	455.197	447.58	442.493	47.5768
487.01	54.9134	59.5065	90.929	97.9161	123.147	146.168	166.872	175.855	197.505	228.031	255.154	278.581	289.372	321.359	323.12	353.05	369.621	389.853	399.432	408.586	425.203	417.876	442	432.918	430.049	46.9492
488.05	53.1199	59.3149	87.9801	97.3602	122.123	141.972	163.479	171.023	193.921	219.959	245.042	270.271	282.069	310.874	313.863	343.301	355.28	377.952	386.332	394.227	416.526	401.343	431.619	423.658	417.492	44.2026
488.95	51.1446	61.2551	86.9196	92.3207	119.315	138.731	161.197	169.428	189.103	213.575	238.625	260.093	274.71	301.319	306.539	334.32	343.128	365.067	375.847	378.978	405.919	389.278	422.675	413.567	406.371	43.2678
490	50.0799	61.6557	86.1977	88.0275	115.723	133.265	158.489	166.273	185.812	208.096	231.283	251.007	266.935	290.532	297.154	323.811	331.666	352.879	365.016	365.733	393.581	380.036	408.765	399.553	394.04	40.3547
491.06	48.8769	59.4974	84.671	83.5065	112.629	128.721	154.734	163.9	179.228	200.455	222.177	242.024	262.921	282.237	289.287	315.474	324.2	340.71	355.642	356.853	384.276	370.079	398.989	387.283	381.274	39.242
491.96	46.9876	57.023	81.5994	81.4599	109.327	124.334	151.002	161.592	173.083	196.531	215.728	234.27	254.845	273.635	279.229	306.843	313.76	328.064	346.15	346.263	370.975	360.848	385.929	377.756	370.282	39.9118
493.03	46.1166	56.2289	79.4033	81.1443	107.471	123.682	148.397	161.418	169.201	191.03	211.403	227.59	247.681	267.842	270.173	295.828	304.904	316.563	336.06	334.186	358.207	348.783	372.937	364.05	362.3	37.7231
493.93	42.3082	56.2812	76.713	78.5122	103.064	119.142	146.08	157.03	163.389	184.969	204.933	219.801	242.112	260.159	262.714	286.557	299.445	306.834	328.294	324.433	349.369	335.934	360.99	355.435	354.752	34.8338
495	40.4317	55.4682	76.3034	77.827	99.6172	118.217	141.787	154.323	159.203	180.13	196.956	213.507	237.082	252.904	255.53	277.564	289.879	300.112	318.857	314.869	339.543	323.096	348.451	342.789	345.544	34.9309
496.06	39.7456	53.1775	73.7147	73.6916	96.9769	115.776	138.143	151.906	154.695	173.294	191.113	204.9	230.601	244.842	247.41	268.68	278.368	291.714	311.319	305.984	329.565	314.098	336.051	331.122	337.652	33.198
496.96	37.2337	52.7294	71.6612	71.8756	94.7298	111.793	134.457	150.154	149.555	169.525	184.89	197.747	224.387	238.797	239.291	262.972	266.999	283.751	302.188	297.643	316.679	301.557	323.398	319.673	326.563	32.3088
498.03	36.2054	49.7725	69.1412	73.0482	93.4877	106.53	130.077	148.424	144.588	162.664	178.457	191.059	217.782	233.026	232.437	251.939	259.397	275.357	292.8	287.466	303.657	293.359	313.922	308.753	322.183	31.3234
498.93	35.435	48.7007	65.9227	72.2649	92.2681	103.766	127.07	143.16	139.147	157.496	173.041	186.347	213.331	224.4	225.345	245.859	250.988	266.604	282.331	282.2	294.41	283.106	303.327	298.832	313.022	30.4145
500	34.3567	45.3412	63.2336	69.5161	90.5917	101.385	122.544	138.92	133.745	154.223	167.483	181.446	206.622	217.245	218.322	238.218	244.159	257.079	271.953	274.51	285.999	276.844	295.362	288.756	303.201	30.1179
501.04	33.8759	44.5171	62.3457	71.0471	87.6362	97.011	119.056	136.462	128.325	151.805	163.38	176.579	200.731	209.403	212.365	230.876	238.102	248.365	260.379	269.413	274.776	268.766	287.745	278.932	293.032	29.0197
501.94	33.7832	43.3191	58.8963	69.3348	87.6512	94.7346	115.403	130.579	124.281	146.134	160.484	174.823	194.375	201.5	206.999	222.02	228.174	243.492	252.84	264.377	266.951	259.602	280.351	268.563	283.766	26.6759
502.98	33.0725	41.3471	58.1647	69.6125	85.1692	93.2403	111.243	128.681	122.09	139.338	157.707	169.21	187.235	193.462	202.551	212.21	220.036	239.489	244.466	255.589	257.165	251.475	269.321	259.504	276.104	26.0566
504.02	34.6762	38.8184	57.0742	68.4512	86.1615	92.6329	106.256	125.865	120.398	136.363	155.516	166.186	183.204	189.699	196.14	207.584	213.219	232.154	236.958	250.04	250.066	244.506	258.748	252.074	268.597	25.6698
505.07	34.0682	36.2662	56.5014	65.5285	83.8871	88.7113	99.3288	121.281	117.547	132.87	150.471	161.629	177.287	182.444	191.743	199.171	206.631	227.855	231.078	244.974	241.117	236.008	248.34	244.208	259.574	24.0472
505.97	33.0085	34.4383	55.9445	62.292	82.4583	83.3373	96.2941	116.179	114.289	128.577	143.89	156.764	171.77	177.185	185.179	188.802	201.438	222.112	222.534	239.559	233.707	230.704	242.156	238.181	252.338	23.8158
507.01	31.4129	34.2904	53.0459	60.1689	79.0816	81.0119	94.515	112.637	110.199	123.94	139.262	151.68	167.024	170.978	178.609	182.9	194.898	216.95	216.129	234.675	221.606	223.6	236.077	230.945	244.064	23.7895
508.05	31.777	33.0227	50.9349	59.0863	79.116	80.4536	91.2409	111.757	107.992	120.902	136.049	147.058	160.876	166.759	173.306	177.464	186.161	210.664	206.96	225.487	214.493	219.237	229.012	221.648	236.867	21.8423
508.95	29.3714	31.5809	50.5328	58.133	76.8399	78.6691	89.0439	109.341	104.136	117.479	132.23	143.519	157.012	160.455	168.121	169.639	179.912	202.514	200.315	219.715	205.729	210.199	220.409	215.417	230.458	21.8761
510	30.5937	31.2835	49.9549	56.8659	74.1915	78.0761	84.898	106.915	101.272	112.182	129.174	139.174	150.473	156.94	161.431	163.326	174.511	197.582	195.6	211.477	199.614	202.895	213.977	210.008	223.645	21.2837
511.06	31.1951	30.0388	48.1449	56.7515	70.9435	75.9677	81.1876	102.605	97.851	110.902	128.156	136.616	148.276	151.873	159.719	156.219	169.38	191.188	189.336	204.278	190.109	194.234	204.753	203.773	217.413	18.631
511.96	30.3268	30.6769	47.1009	55.0653	68.8625	74.9766	78.7711	100.146	97.3965	108.663	122.329	134.169	142.948	150.103	154.149	148.538	165.137	184.659	181.561	197.685	185.168	186.224	197.784	197.154	212.278	17.6468
513.03	31.2038	28.2592	47.163	53.9282	65.9166	72.3114	76.3948	96.0655	94.9394	106.349	119.658	131.418	137.193	145.704	149.243	144.129	159.657	178.964	177.741	191.754	179.104	179.635	191.813	191.971	206.971	16.6129
513.93	31.433	27.36	46.2895	52.9377	62.3193	70.7933	76.5824	93.8654	94.0879	104.691	116.528	127.202	133.083	139.575	143.974	140.307	154.646	171.666	172.956	188.056	172.774	171.807	186.056	186.397	195.518	15.85
515	32.9576	25.962	45.8826	51.9063	60.0379	68.2065	72.8064	90.3478	90.2008	101.393	114.152	123.63	129.416	136.523	138.098	137.904	150.918	166.239	167.787	177.911	165.639	163.831	178.962	181.668	188.529	15.667
516.06	32.7129	25.2896	44.3177	49.9267	59.1328	67.0238	72.3272	87.03	88.55	98.1782	111.305	118.894	126.115	133.227	131.024	131.702	144.345	160.675	164.668	173.056	160.987	159.037	170.923	175.65	181.468	14.3047
516.96	30.8536	24.0579	42.4473	49.1203	57.0284	65.1584	69.3187	83.6514	83.3966	97.768	106.749	111.895	123.703	129.989	126.205	129.07	136.031	156.476	158.922	167.032	156.869	153.472	165.107	169.387	175.177	15.2053
518.03	29.2271	23.7417	40.2366	45.669	55.0161	61.6188	67.5276	80.6698	80.1323	96.0262	103.629	108.714	119.966	121.809	119.643	123.977	132.548	150.253	155.222	161.779	153.84	146.266	161.868	163.297	166.702	14.3424
518.93	27.244	23.1383	36.4879	44.8131	54.631	57.8581	63.5104	78.2249	77.4896	91.5089	100.378	102.614	117.627	115.93	116.399	120.494	127.554	146.27	150.72	157.333	149.621	139.141	157.848	160.809	160.456	13.0373
520	25.403	22.7065	34.3024	44.3882	50.9504	57.2571	60.8672	75.9935	75.8232	86.116	95.4326	100.426	113.362	109.884	112.066	117.566	121.427	136.843	144.571	151.487	145.153	132.665	151.412	156.358	153.756	12.7814
521.04	24.1258	21.8042	32.2671	43.5008	49.8892	54.1332	57.2861	71.9848	75.3095	83.415	91.5077	96.8308	110.489	106.048	108.512	114.077	117.94	132.943	139.39	147.572	141.903	127.471	146.054	151.116	148.879	12.6126
521.94	23.4922	21.1689	32.1268	41.6061	48.3263	54.2898	55.7459	69.3599	74.1806	80.6144	89.8466	95.2306	105.716	102.486	106.866	112.023	112.144	127.509	135.643	139.951	138.76	121.63	143.746	146.727	143.366	12.6235
522.98	21.4922	20.9958	30.6859	39.7807	47.561	53.5933	55.4176	67.3666	73.8119	78.8599	86.0467	90.1842	102.657	100.028	102.75	109.909	108.811	121.092	133.23	133.865	136.532	118.309	139.811	143.236	140.198	13.3146
524.02	19.5726	19.2441	28.3135	38.3398	45.0271	51.1349	55.6023	66.8944	72.2698	76.325	82.1544	87.1308	98.1633	96.893	97.5456	105.832	103.654	117.522	130.342	128.134	133.443	115.473	134.932	135.732	136.831	13.4936
525.07	17.3827	17.1262	26.8183	37.2145	41.1208	51.2027	54.5485	65.0163	69.7989	74.4394	79.2444	84.5434	94.1355	94.4773	93.1275	102.67	101.127	114.174	127.84	122.481	129.423	110.152	131.08	133.617	130.549	11.88
525.97	15.9465	16.5921	24.5308	37.4676	39.3487	51.4353	54.2357	63.937	69.2012	74.0899	76.6164	81.9824	90.5087	89.9281	91.6478	98.9695	96.6821	111.585	123.247	117.701	125.188	108.048	126.872	129.44	126.242	11.5839
527.01	14.0076	16.7503	22.5563	36.4542	38.0439	50.6966	53.8822	61.4308	67.7061	71.5365	72.8566	78.8408	87.3474	87.4977	90.01	95.7773	91.7182	106.167	119.596	112.969	120.491	102.693	123.159	125.328	123.672	12.2223
528.05	12.4291	18.5396	21.4592	34.2462	35.8287	48.6997	52.4913	59.6732	65.0761	68.8304	69.1259	74.6434	85.4437	85.1138	87.1034	93.8982	90.108	103.82	116.729	110.478	116.918	101.951	117.965	121.776	118.503	11.4994
528.95	11.5948	17.3504	21.3696	34.1799	34.0771	48.9339	50.8516	59.1353	64.3132	65.6803	64.7213	72.1501	81.7933	80.9983	83.3333	92.4273	85.9545	101.724	114.081	106.481	112.814	99.1317	114.099	117.647	112.923	12.8589
530	10.3144	16.8094	18.876	32.5592	35.3238	46.8555	48.6435	59.0288	61.953	64.5192	59.9826	68.7694	79.3444	78.3945	82.0721	90.0709	83.4168	97.8499	109.777	101.904	109.271	95.9642	112.648	114.331	107.927	12.3591
531.04	10.6505	16.2871	19.1988	33.6709	35.1723	43.9289	46.1876	57.8365	59.3714	62.9163	56.3513	67.4403	76.6738	75.952	79.5772	88.4231	78.7994	95.8106	104.376	97.1439	103.179	94.4976	109.835	111.922	104.507	13.2618
531.94	10.0107	13.8417	18.5448	34.4485	35.4329	44.0567	44.9225	54.1597	55.791	60.4035	53.5126	64.4	74.9432	74.2776	76.4837	85.4722	78.3452	92.5253	99.0032	93.7984	100.617	95.6095	107.1	107.79	102.146	13.1811
532.98	10.8356	13.1181	17.8501	32.4426	35.9931	44.2222	44.7948	51.9244	53.3757	59.4726	49.5242	63.6637	73.979	72.0641	73.298	83.4984	77.843	86.8664	94.3746	89.7041	97.5977	92.5063	103.502	105.088	96.4816	13.0331
534.02	11.5557	13.2811	18.6142	28.6174	35.0286	42.311	44.5231	50.5147	51.2174	56.5789	46.3927	61.7771	70.2735	69.634	70.0383	78.9608	77.2821	83.3813	92.7631	87.0833	94.0599	90.515	100.911	100.891	93.7596	13.906
535.07	12.8391	13.6934	18.6275	27.8821	35.424	40.7287	42.9477	48.6763	49.1608	55.9906	43.2249	59.1184	66.7335	65.382	68.4411	75.8212	75.2831	81.3533	90.4746	85.9692	90.1993	86.9561	98.4432	96.6812	89.9751	13.0825
535.97	11.127	14.1976	18.8137	25.2031	35.8768	38.7461	41.4619	46.7263	48.2618	54.3912	42.085	57.8552	65.1889	62.7242	66.8626	70.8558	73.5621	80.4986	87.9446	80.8424	87.0399	85.3468	96.2337	93.3206	88.384	12.9494
537.01	11.9758	13.4009	20.7026	23.4492	34.6829	36.389	39.7707	46.7285	45.2787	52.4301	39.4556	55.7971	62.1929	60.0668	64.8732	69.5058	71.3923	76.0672	83.8944	79.3398	82.3805	82.9563	91.4966	90.4464	84.5675	11.9822
538.05	11.6599	13.2549	21.3371	20.7047	36.7867	35.4882	38.7048	46.1736	44.1539	51.5902	36.3778	53.5145	62.5896	58.5593	61.9169	65.8752	70.9922	73.4964	80.1053	78.0038	79.2566	80.4957	89.4635	87.5822	83.8864	12.7376
538.95	12.9073	13.6245	21.7095	19.0011	34.8474	33.0669	37.8808	44.5114	41.4907	50.3399	34.4053	50.6259	58.5845	56.9536	56.9011	62.5928	68.3578	70.1717	77.6871	76.9797	76.483	77.1803	85.0814	84.3068	80.8615	12.5378
540	13.1994	12.284	22.2604	19.4935	34.254	32.1363	39.4976	43.8104	39.2015	50.0986	32.4437	49.3108	56.7907	57.255	54.7095	59.5283	66.1918	66.6756	74.3852	74.4721	71.3272	75.904	82.4999	80.8432	79.3184	11.9482
541.04	13.272	11.8389	21.9648	18.8201	32.4646	30.5092	39.371	43.0089	37.9046	47.3267	31.4603	47.4804	56.081	56.2149	51.821	57.4494	62.8963	64.1956	72.0555	71.9533	67.1648	74.3445	79.3343	77.0272	76.0653	12.2179
541.94	13.4362	9.70286	21.4494	20.5681	32.886	27.579	38.8206	41.7799	36.8783	45.4753	32.9094	45.0898	53.0113	55.2057	52.809	55.8772	60.1555	62.4534	68.9769	68.7421	65.4043	73.1672	75.3254	75.1719	73.1778	11.9965
542.98	13.9071	8.19986	21.2709	20.0434	31.8684	25.6023	38.0392	40.6845	34.3284	44.1496	32.8595	44.8429	52.9407	54.4285	50.9744	52.977	58.5599	60.8051	67.9952	67.5896	62.8141	68.44	72.4365	70.7501	69.3078	12.0924
544.02	13.9018	7.323	20.5959	17.9567	31.9909	23.7772	36.7912	39.157	32.9515	42.7398	33.3853	42.9829	49.8819	54.3246	49.7463	51.6535	56.5802	56.9824	65.5962	65.301	61.1095	64.8838	70.4246	66.7779	66.8169	10.7321
545.07	13.2475	6.02135	20.638	17.6004	31.5817	23.2793	37.3343	38.4686	32.8773	42.4083	33.9824	40.8753	48.2604	53.0861	49.5104	48.2143	54.6868	56.0996	62.704	64.6825	57.5898	59.2301	68.3726	63.7298	63.7266	10.5953
545.97	13.4156	5.63183	22.5988	17.4466	31.099	24.091	36.2433	38.652	32.6444	42.3037	32.4388	37.6401	46.0927	52.1717	50.0035	46.665	53.4649	54.7212	61.435	61.7588	56.0302	57.9984	66.4157	61.4348	60.3492	10.5983
547.01	11.2676	4.42453	20.6937	17.1535	28.4336	22.6551	33.7832	37.7877	31.0361	42.5744	33.2302	35.7374	45.9371	50.3605	50.9544	45.3488	51.5418	54.6856	59.0124	61.2186	51.0798	56.0797	62.2478	59.2447	57.5883	10.9096
548.05	9.12417	4.43586	20.6831	16.5414	27.1122	21.2322	33.5688	37.9172	29.9764	42.3704	34.0728	34.1428	45.4582	50.5638	48.432	43.734	49.1562	54.0471	55.2208	60.6395	47.5192	50.2924	58.1573	55.0904	53.3283	9.41394
548.95	7.48217	2.2419	17.6349	15.3161	27.3857	20.1273	30.556	37.1386	27.7585	40.0719	33.1989	30.6194	44.4297	50.3318	47.0639	42.5325	48.0083	54.2095	53.9042	57.3975	45.1904	46.4752	54.2681	50.6193	51.6897	7.91289
550	7.15488	1.42884	14.5751	13.9729	26.297	20.0026	30.3996	35.8292	27.683	37.6922	34.132	28.4143	42.8952	48.102	46.377	40.5763	44.991	53.8166	51.1667	56.6941	45.7949	43.3864	53.1653	47.562	49.6753	6.59241
551.02	6.9442	0.604128	11.6047	14.1801	24.3836	21.3326	28.1895	34.2394	25.7889	37.331	33.9191	24.9257	41.0386	45.3371	46.0656	39.783	41.2439	52.3485	47.7554	55.5224	44.7375	40.4204	52.1232	45.3097	47.768	7.20651
552.05	7.71014	-2.28404	10.6092	13.8867	23.1534	21.4467	27.3728	32.8494	25.4965	36.2566	34.9294	25.8519	38.7684	40.1975	44.4581	39.3058	40.7469	50.0151	46.8053	54.4768	44.2159	36.5198	49.4488	41.3963	45.3379	4.97083
552.94	7.87252	-3.02859	7.86418	14.5157	22.4905	19.8472	26.427	30.9168	22.6487	34.4261	34.9999	24.5071	37.9889	39.5042	43.9581	37.9455	37.9557	48.5882	43.5242	51.9619	42.0175	34.492	47.1624	42.253	43.9068	4.68847
553.97	8.83907	-2.68049	8.6959	15.5102	21.6529	20.5899	26.199	29.1604	23.1022	34.0762	34.7007	23.6354	36.8948	37.6099	44.0489	36.6071	35.7042	46.3304	41.5218	49.5191	41.9492	31.8506	45.723	38.8321	42.3016	4.13922
555	5.84826	-3.07935	8.24414	15.6728	21.166	18.8913	24.2193	27.9359	24.9013	35.7497	34.6995	23.2894	35.4888	35.8804	42.8009	34.3836	34.117	46.2719	39.5568	48.3255	42.8201	27.9214	45.1115	35.0907	39.0315	2.50211
556.02	4.35063	-4.28054	6.57584	14.3432	19.1996	18.616	21.9869	27.6529	26.3622	35.872	34.7863	22.1751	34.088	34.9614	42.0085	34.6281	30.2103	44.8636	38.8875	45.0358	42.1211	25.799	46.0089	32.5226	38.8667	1.76313
557.05	1.77988	-4.57094	4.62575	14.7901	18.5281	18.3286	21.9695	26.8356	25.7238	35.6131	33.7233	20.7519	32.0504	33.2484	39.1986	32.7676	28.3792	43.7796	38.7873	43.4377	40.8155	23.6661	45.7127	31.0215	37.0947	0.567288
557.94	1.18494	-5.28625	2.60316	13.9376	16.8309	16.4142	20.7131	27.994	26.3245	34.9406	33.3956	20.3463	31.2021	30.7861	37.4118	30.5304	25.491	42.637	36.0218	41.1015	38.6463	22.1942	46.2878	28.9411	35.0774	0.81845
558.97	0.772326	-6.28091	2.3164	14.0848	14.7931	18.5109	19.6469	25.178	26.551	35.6535	30.6277	21.1468	28.4792	27.1009	35.9641	29.3029	23.834	41.3286	33.4886	40.3483	36.2937	20.6471	44.536	29.7472	30.818	-1.5972
560	-0.113687	-4.95792	0.405392	14.4312	15.4835	17.5406	18.6515	27.2983	25.8664	35.9902	29.844	20.9483	29.9027	25.5946	37.1026	29.3001	20.5743	39.1084	30.9016	40.7192	33.6658	21.4412	44.7141	26.4868	29.3044	-0.250189
561.04	-1.0726	-2.98092	-0.118503	12.4854	15.0917	15.6124	18.041	27.456	25.631	34.4682	28.3755	19.7476	27.2062	24.646	34.8956	28.893	20.4997	36.2471	29.7099	39.8394	32.0096	19.3626	44.3915	25.16	29.0335	0.830961
561.94	0.177948	-1.44753	-0.247389	11.5192	14.7776	17.4381	15.4881	26.9374	25.7451	33.3433	27.6613	18.4427	27.8807	22.8754	33.8529	27.9305	20.8873	35.6813	30.2123	39.1551	29.5142	21.5589	44.6199	22.8931	26.2494	-0.549014
562.98	-1.21518	-1.36937	0.590397	12.2053	15.2079	18.8177	14.4396	26.26	25.1015	31.2862	26.5801	20.8966	27.4323	20.7254	31.8945	27.0617	19.3929	32.9238	27.8501	36.957	29.5332	19.5563	45.3541	22.9692	25.0017	-0.277508
564.02	-0.729741	-0.45958	-1.08209	11.704	16.136	18.8135	11.4191	24.634	23.5251	30.9552	25.3441	22.0158	27.1725	18.7927	33.9872	25.1145	17.8651	31.6154	27.0722	35.4218	29.0901	19.7204	46.0417	23.6328	22.6382	-0.0717477
565.07	1.24287	0.143643	0.350944	11.3592	16.4505	20.1351	11.7338	22.9497	23.9334	28.5278	25.5075	21.5704	25.6382	19.6117	32.1514	24.0387	16.9902	31.1784	27.74	33.0457	28.3009	19.1291	43.9038	22.8173	24.3939	-0.609657
565.97	1.28905	2.18437	1.12489	9.39516	18.2927	22.4665	10.9803	20.4507	22.1809	26.9078	23.7891	22.145	23.5126	18.7838	31.1476	23.3575	16.8407	28.273	26.2511	32.1332	29.0898	18.1954	42.7811	21.3465	23.3521	-1.39702
567.01	3.22624	4.54316	2.16663	8.46427	18.1531	20.6578	9.73473	20.2937	21.6935	25.8221	21.8993	20.74	21.6169	17.0471	27.2778	20.9231	17.5196	26.7844	26.9574	30.1925	27.4303	17.6704	42.5992	19.801	22.7282	-0.694373
568.05	2.48333	6.38621	2.82558	7.08779	18.2552	19.535	9.06898	18.3542	21.8355	23.5196	21.0618	20.9497	18.6333	16.5931	27.1855	20.0976	17.5661	26.1474	27.3527	29.3849	27.3353	16.7211	42.348	18.2228	22.24	0.15134
568.95	1.70905	5.93439	3.43736	8.7196	18.8719	17.6445	8.22459	16.6492	20.9956	24.431	20.0461	20.6484	18.0896	15.3331	28.0746	19.9025	18.4089	24.092	28.5094	28.9235	25.2059	15.4621	41.4024	18.5106	21.2917	0.0925139
570	0.230408	7.25352	5.05898	9.81241	16.919	15.8832	6.13424	17.3058	19.9999	22.2334	18.3663	21.0627	18.6375	14.6769	24.9075	19.675	19.5438	21.8692	27.7043	28.3284	24.8257	16.1849	41.0091	18.1673	22.6761	-0.00730747
571.02	2.27229	8.41843	6.62896	9.37559	17.1195	16.1379	5.92378	18.0976	19.0551	20.2822	17.6899	21.7491	19.3693	13.8477	22.5717	20.4273	19.5346	18.9653	27.7004	29.979	24.1711	17.1233	38.0065	18.2659	22.6423	-1.04613
572.05	-0.0540158	7.84031	6.79228	9.63909	16.7694	15.5387	4.98713	17.1975	20.7061	19.0895	18.2596	19.7669	18.907	13.8035	21.3141	19.1102	20.1612	18.1481	27.1394	28.8854	21.7023	17.9231	37.0364	18.1664	22.8759	-0.610045
572.94	1.46462	7.4621	7.57977	9.22097	15.2114	14.5022	4.37951	15.508	19.1628	19.1842	19.4748	18.7031	17.6167	15.2695	19.1308	20.5084	18.0674	16.517	27.3422	27.9384	22.4137	19.9814	33.8417	17.3664	22.7124	-0.35803
573.97	0.0704081	7.67481	6.60338	10.1965	15.475	14.3839	4.466	13.3969	17.4466	17.375	16.9149	20.4272	16.9852	14.5344	20.8743	18.0453	18.0098	15.7148	28.2196	25.7851	19.9175	21.9008	33.7903	16.5167	20.7629	-0.129894
575	-0.42163	7.41157	5.24536	7.68727	15.8849	12.6486	4.13385	12.1581	17.6313	15.5905	18.16	18.7734	16.051	15.5798	20.9335	19.1039	17.1752	14.3294	28.9257	24.0582	21.2261	20.374	31.4252	15.3889	18.921	0.728146
576.02	-1.43589	7.31271	7.56519	8.20242	16.0599	12.8996	4.03022	11.5689	16.446	14.6634	17.9157	19.1212	15.4461	16.3456	22.2915	20.6995	17.847	12.9372	29.4864	22.5226	21.1697	19.711	30.7549	14.8035	18.1419	0.524857
577.05	1.48928	7.24399	7.97491	5.95808	14.243	12.7279	3.62907	11.3499	13.8647	14.642	15.7309	17.9838	15.3472	15.4221	21.6893	19.2421	16.298	12.1004	28.4302	21.4269	21.5047	16.8676	28.8896	14.4026	18.1647	1.40543
577.94	1.04319	7.3067	8.88765	4.3892	13.9768	13.831	3.96144	12.0042	13.9434	12.0907	13.6928	17.6483	14.6022	13.8265	21.5344	17.352	17.4599	11.1669	26.6654	20.0231	20.7906	15.9249	25.7224	13.0137	18.5757	3.20876
578.97	1.67871	7.11886	8.41439	4.43889	12.3001	15.8387	3.1528	10.9458	12.7293	12.3674	11.5528	16.4409	16.9402	13.3909	22.1551	16.4926	16.9492	12.5215	27.457	18.3813	20.7702	15.8458	23.3204	13.8658	18.9026	3.19964
580	1.48871	7.66841	7.93959	3.08	10.6279	14.6066	3.07064	10.4908	10.8646	12.5804	10.1775	16.3628	15.4501	14.5765	22.2656	15.0801	14.8203	12.6073	26.902	16.4103	21.1882	17.3117	21.0759	14.4704	18.21	2.03231
581.02	-0.400047	6.56243	7.77985	1.95108	9.45851	11.8992	2.49436	9.65535	11.2101	10.1908	10.1374	16.5135	12.56	14.6224	18.7515	14.5655	13.59	13.0778	24.8799	15.815	18.2335	15.4572	20.6872	12.9362	19.518	2.32652
582.05	-0.60986	5.36111	8.44994	1.08771	9.16171	11.5481	4.32545	9.281	10.4742	9.27992	8.20201	16.0423	13.2152	14.6287	18.4022	14.9085	13.178	14.5071	25.2143	13.8411	17.528	11.9271	18.5852	13.6708	18.6229	1.33213
582.94	0.465488	3.86854	8.39567	0.158703	10.353	12.05	4.40788	10.3711	9.57656	7.51491	8.11522	13.7251	12.5672	13.9605	17.662	16.2568	12.9954	14.0255	25.1705	12.1885	16.8961	12.5668	18.741	14.8171	16.3489	2.45732

## Sheet: Sheet2
	0	0.1	0.2	0.3	0.4	0.5	0.6	0.7	0.8	0.9	0.75	0.85	0.95	1	1.1	1.2	1.3	1.4	1.05	1.5	1.6	1.7	1.8	1.9	1.15	1.25	1.35	1.45	1.55
DCP conc	0	2	4	6	8	10	12	14	16	18	15	17	19	20	22	24	26	28	21	30	32	34	36	38	23	25	27	29	31
332	70.695	85.5503	74.4341	84.972	90.507	92.006	91.7605	111.568	127.42	150.811	121.464	162.779	181.699	178.213	205.826	235.592	277.491	299.249	212.294	326.304	331.013	362.375	361.987	348.745	242.328	265.652	273.289	333.583	330.761
333.07	63.8437	79.3207	70.042	79.3211	84.4548	88.3637	87.1664	105.553	123.596	149.841	119.656	160.013	183.571	179.024	208.642	241.992	284.138	307.087	213.186	336.66	344.641	371.351	371.485	358.283	244.337	273.355	283.278	339.439	339.597
334	56.0777	71.4603	66.7922	72.6965	78.4589	83.0332	81.9845	98.3096	120.203	148.928	116.148	153.789	182.967	180.002	212.341	245.991	291.155	317.078	213.801	343.754	354.753	380.198	381.934	367.544	248.294	279.55	292.282	344.136	350.402
335.07	51.9108	66.7797	63.6079	66.6396	71.1703	76.0548	75.2993	92.0879	115.026	149.789	110.289	149.82	181.15	181.056	218.25	254.643	301.208	324.465	216.418	351.876	364.396	391.598	391.48	376.589	253.695	283.959	302.428	351.13	359.823
336	46.2496	60.7494	61.2766	60.3946	65.1614	70.6232	70.4035	86.5726	111.887	148.743	109.643	147.125	183.597	183.81	224.333	263.961	309.778	329.897	217.072	364.525	376.432	401.544	402.27	388.403	255.251	293.739	311.275	360.083	372.438
337.07	40.6418	52.1791	57.123	55.2862	57.5657	65.1518	67.164	80.5925	108.241	150.018	105.221	142.126	184.959	183.692	230.533	272.166	315.207	338.494	219.532	371.283	388.738	412.562	413.299	399.601	258.193	299.197	318.303	367.122	383.302
338	38.5806	48.9554	54.9344	50.7793	50.4372	63.664	62.947	73.8269	105.769	149.015	105.926	139.129	186.393	189.624	232.617	279.55	327.04	343.62	221.18	380.356	398	420.148	426.634	410.764	261.508	305.323	328.591	380.116	397.089
339.07	37.4446	44.8164	51.7445	46.5897	45.8031	56.9045	57.0491	67.4021	102.414	149.176	102.091	134.893	184.413	192.324	237.543	288.346	332.76	350.689	224.311	390.991	404.999	428.92	435.037	423.3	269.453	313.775	337.043	390.964	404.78
340	31.9172	43.1575	47.275	40.3342	42.1155	51.358	55.2499	60.6958	100.898	147.705	100.064	130.63	184.036	194.686	241.512	295.638	345.104	357.882	224.509	402.483	414.866	437.415	444.08	431.689	275.812	320.562	348.426	399.797	414.534
341.07	30.5721	38.5197	42.6863	37.5771	36.651	49.1011	49.2628	57.1648	101.12	146.97	97.0098	130.217	183.56	199.584	245.821	306.098	351.296	366.123	227.261	414.391	424.377	450.482	456.488	441.512	283.176	326.386	360.893	407.597	426.997
342	23.6964	35.4703	38.7664	35.4359	34.9581	46.705	44.385	53.8755	98.6383	148.811	91.0817	129.76	183.93	203.006	253.653	313.576	364.797	374.466	231.374	423.878	435.796	459.228	467.644	455.704	291.047	332.677	370.454	412.414	437.999
343.07	20.7742	31.0096	35.9945	32.7396	32.4994	46.7279	38.403	49.8565	93.1641	149.626	87.3274	127.351	181.533	204.628	258.473	318.247	369.728	386.056	235.447	435.994	448.732	473.169	482.019	468.668	296.775	336.436	378.683	421.098	449.268
344	18.7991	28.8119	33.9455	27.884	30.2239	42.0672	35.2048	46.9557	91.7727	149.624	86.7499	125.163	182.091	206.664	261.939	328.51	375.94	399.904	235.71	443.804	459.982	480.866	493.629	478.076	300.067	345.961	387.648	432.11	463.743
345.07	15.0786	25.0367	31.1552	25.0987	29.2306	36.4619	32.0546	44.5825	89.8033	147.512	82.7501	125.345	181.672	207.2	269.262	333.949	383.777	404.508	234.806	453.8	474.604	493.852	505.481	494.801	305.841	351.07	397.52	437.057	471.531
346	13.3776	23.9544	26.4928	21.9853	25.6865	34.8576	29.5782	42.5436	86.3863	149.316	78.7789	124.789	181.202	211.792	271.33	338.547	388.868	417.209	236.921	466.148	490.081	501.572	517.99	506.546	309.309	356.74	409.147	448.236	475.319
347.07	14.6346	22.2227	24.852	18.9211	23.8057	33.3953	27.0281	43.2666	87.0605	148.672	75.2452	125.228	182.149	212.979	276.567	343.952	395.633	430.348	238.096	476.347	502.99	511.825	529.702	519.863	315.596	365.845	420.339	458.356	485.284
348	13.5744	21.3794	22.6796	16.6038	21.2028	29.3645	26.8753	42.7482	87.7569	149.755	71.8134	124.071	183.997	212.846	279.77	351.117	403.761	441.439	241.004	483.114	513.132	522.605	537.874	532.896	320.126	370.909	429.271	466.022	498.641
349.07	14.0175	22.127	19.2356	16.0179	21.4972	26.2484	25.3255	43.8029	87.4289	152.26	69.1181	124.447	187.339	214.274	285.386	360.166	413.47	451.557	245.602	495.567	526.494	533.922	548.092	543.063	325.498	377.538	432.135	474.672	502.971
350	13.0316	20.6445	14.7781	16.4227	20.7093	23.0993	25.167	42.9458	87.3882	155.363	63.8211	124.301	187.56	215.073	291.336	364.049	423.227	460.517	248.741	506.881	535.63	547.395	559.078	557.375	331.342	384.985	437.411	484.163	513.429
350.93	10.1821	19.5156	12.3731	15.1633	20.5058	21.6174	26.6813	41.5761	88.9657	158.803	65.8968	126.054	190.454	215.332	295.472	366.016	428.03	472.212	251.782	516.947	547.985	557.601	570.748	568.254	340.805	397.404	442.139	495.064	523.546
352.03	8.476	18.4171	12.2646	14.0085	21.1857	20.7023	24.7674	40.6325	91.236	157.75	66.6107	128.645	190.428	215.795	298.97	369.334	434.785	483.967	252.87	526.249	563.841	571.062	578.49	582.391	348.942	404.183	448.875	501.264	533.249
352.96	9.17679	16.595	10.8186	15.7761	21.6131	17.5184	23.1785	41.287	94.4297	158.502	66.3104	128.921	191.174	216.897	303.167	375.771	440.339	494.671	255.714	537.471	570.433	583.101	590.136	596.401	354.639	411.508	453.58	511.049	548.056
354.06	6.34514	13.733	9.53165	16.0466	21.5836	15.348	21.3517	42.3769	94.9621	158.832	68.1357	128.943	193.742	219.971	307.311	382.123	445.392	501.238	260.792	548.811	577.51	594.519	604.712	609.492	358.822	416.189	460.331	519.376	557.324
355	5.534	12.8364	9.64745	18.3574	18.5708	13.3339	20.6356	43.3959	95.8872	162.439	65.5229	130.473	199.904	222.66	306.505	387.435	449.991	507.973	263.901	560.162	588.607	602.995	622.13	621.814	359.646	421.549	468.535	524.335	568.473
355.93	2.67101	12.3929	9.24357	18.0603	19.277	15.9763	21.3687	44.7761	96.4977	164.667	65.448	133.051	203.67	223.142	311.207	394.035	455.505	515.638	272.055	569.853	599.573	613.374	634.394	628.722	361.041	432.039	475.572	533.525	577.507
357.03	0.760762	8.98186	9.73812	19.2879	20.1238	17.4027	20.0265	43.9781	95.477	164.35	66.8248	134.619	205.511	225.737	315.572	401.002	457.543	525.84	275.516	578.519	611.312	623.21	645.781	635.603	364.334	433.232	482.295	542.252	586.629
357.96	1.29627	6.71195	10.0438	18.8666	18.0633	15.7931	21.0721	45.231	99.3111	165.595	65.701	133.952	206.97	227.16	317.487	408.651	461.833	530.915	278.478	584.349	615.696	634.213	657.058	644.783	365.541	438.111	486.921	545.497	599.336
359.06	1.63596	6.95709	13.2636	19.6025	19.0112	16.0646	20.2738	43.8055	101.037	168.808	66.826	136.904	211.875	231.347	323.056	411.349	466.724	535.957	282.497	591.506	621.307	642.564	667.7	649.447	370.934	442.058	489.73	549.904	609.216
360	3.28864	7.10995	16.7791	21.8419	20.3672	17.4119	21.0647	45.8073	100.97	169.903	68.7534	135.985	218.82	234.21	328.494	417.045	469.007	540.915	285.617	594.168	629.381	650.235	674.699	660.855	373.593	447.124	496.693	556.054	621.37
361.07	5.38767	5.80794	17.1485	23.6153	20.0998	18.5756	19.8706	45.3786	103.318	172.481	68.9699	135.068	224.631	237.993	330.689	417.753	471.186	543.576	289.722	595.993	632.067	657.792	682.553	665.74	375.926	447.703	501.911	563.796	629.544
362	10.1139	7.47513	18.3971	22.9797	21.4185	19.1467	18.8656	46.03	105.227	173.952	73.5326	133.621	227.245	242.47	332.374	419.441	476.771	546.435	292.423	601.247	629.054	663.776	688.782	675.732	383.681	450.009	508.2	572.362	635.227
363.07	11.0001	6.11852	20.4084	23.7253	21.67	19.3529	17.6689	45.4755	105.813	177.306	73.693	131.091	227.412	244.574	336.792	423.065	480.83	551.596	294.816	608.474	632.161	670.959	688.878	680.114	385.59	451.762	511.135	574.623	632.86
364	10.827	7.36684	20.5313	24.4198	22.1899	22.0977	21.0055	46.1576	107.104	177.057	75.8905	132.077	230.762	249.22	339.185	425.135	488.056	558.4	297.307	611.045	636.686	676.18	693.175	688.331	389.293	453.791	515.44	576.735	637.239
365.07	13.0311	8.05597	19.9365	25.1406	22.4617	25.3428	19.6284	48.4958	109.26	178.851	76.8194	136.44	230.167	251.097	341.811	426.648	489.771	560.25	297.829	612.031	636.927	681.003	693.725	693.199	387.402	455.469	519.535	576.89	639.311
366	9.67614	9.40771	20.7603	26.2871	24.415	27.0456	17.3747	49.0351	109.202	181.229	78.4251	138.612	230.803	252.026	344.148	427.729	492.179	564.38	298.947	615.674	639.069	679.983	693.613	697.311	386.665	457.398	520.465	579.074	640.813
367.07	10.3671	8.86099	21.7825	25.4142	24.631	29.0505	18.2861	50.7257	109.182	181.162	78.349	140.289	228.557	254.398	342.562	429.002	494.275	565.083	299.201	611.03	642.686	679.309	698.106	699.155	385.858	452.952	522.238	580.982	639.792
368	14.3774	12.5811	24.1174	24.6204	26.11	29.4609	20.6466	51.5829	111.091	181.47	80.7569	141.968	226.847	253.459	341.518	434.469	500.218	564.993	298.462	609.134	646.53	678.312	696.01	697.611	385.968	454.075	526.802	578.304	634.681
369.07	16.6405	13.7571	23.5414	23.2522	22.9138	29.8947	23.4752	54.1758	110.751	184.54	81.7291	142.667	225.027	254.941	342.524	432.006	502.012	565.071	297.956	607.426	647.553	678.459	695.086	700.404	384.974	453.042	529.186	576.486	626.777
370	19.3078	16.894	22.4762	23.4787	22.9944	32.748	27.4195	56.3023	110.906	186.619	82.6276	140.799	226.366	255.096	340.471	432.453	500.792	571.86	299.579	610.629	647.369	674.427	691.531	693.431	383.743	454.615	528.956	580.994	619.989
371.07	21.9482	19.2381	24.4278	24.9449	24.5992	33.86	31.1861	57.9773	112.698	185.869	83.0661	141.938	227.098	254.736	342.194	430.046	502.035	572.358	297.797	603.894	646.564	673.945	684.463	689.751	384.478	455.054	521.556	581.612	616.098
372	19.7629	21.297	21.7248	25.3758	24.707	33.6326	33.7592	56.7152	112.72	189.197	83.2518	141.78	227.22	253.223	340.025	429.73	501.429	566.312	298.424	598.53	644.127	671.584	675.436	683.788	384.255	451.89	519.007	580.602	610.576
373.07	20.6985	22.2549	21.4844	27.6679	27.5642	33.3506	34.7908	56.5965	115.17	189.95	84.4625	141.96	226.726	256.723	340.805	428.473	500.602	560.195	299.06	595.868	640.113	668.505	672.406	678.931	384.779	454.048	510.258	581.374	600.915
374	20.3438	22.6303	20.3462	27.5179	27.0683	33.7995	39.1501	57.7644	116.716	189.291	83.2255	144.866	222.839	256.885	340.864	422.423	494.705	556.562	298.374	592.688	633.279	666.03	665.222	668.849	383.854	452.264	505.036	578.932	598.387
375.07	19.4826	26.0758	20.6343	27.257	28.8323	33.622	39.9929	58.9062	115.374	188.399	85.2096	143.873	219.476	255.475	340.723	421.187	494.446	553.575	297.988	590.727	630.215	662.68	657.333	661.971	386.007	452.24	497.776	574.905	592.247
376	17.8567	26.6396	20.107	26.6972	29.7713	35.768	41.3395	58.7106	116.818	187.109	85.7627	144.396	215.887	252.742	340.823	419.19	491.46	545.488	293.941	588.408	625.184	660.102	650.73	656.99	384.46	443.863	492.131	570.556	589.101
377.07	19.6359	28.6491	18.6759	28.3893	29.0625	34.2715	41.7998	63.2472	116.366	185.723	84.8804	145.891	216.06	250.949	339.987	414.677	484.887	541.557	290.805	587.316	613.583	648.536	647.966	650.456	381.53	440.268	483.704	569.323	587.276
378	18.5285	29.9912	19.6364	29.2695	28.3146	36.5251	45.4991	67.0783	116.917	183.783	85.6936	144.018	213.237	249.114	334.037	410.52	476.274	532.637	290.4	584.221	610.377	639.932	639.319	637.789	377.457	433.586	481.789	564.307	581.882
379.07	20.044	31.4688	20.8746	31.4209	27.3909	37.8246	48.4488	67.4185	116.39	180.288	84.3625	145.387	212	245.788	329.544	404.52	469.265	524.407	288.766	578.817	607.27	632.721	632.959	625.167	373.391	430.435	478.025	555.966	577.494
380	19.4967	31.5673	20.8693	28.6821	26.9883	41.3114	51.2511	68.0686	116.468	176.727	86.0597	147.098	209.572	244.318	331.291	400.933	462.528	516.574	286.917	569.049	602.01	622.305	620.881	613.032	369.21	426.985	469.563	549.384	570.694
381.07	19.2619	29.5369	25.1691	29.1261	27.0257	42.1958	52.9472	69.4919	113.726	173.777	83.3622	147.029	207.274	243.417	326.569	393.294	455.836	508.417	281.214	560.579	595.917	613.1	610.893	600.913	364.362	415.488	459.903	540.524	565.154
382	19.4126	32.1931	28.021	28.4403	28.4961	43.5867	53.8856	71.0574	112.491	175.08	82.7645	145.198	206.077	238.964	323.786	386.449	446.521	497.322	278.449	550.87	589.863	602.8	604.176	589.688	362.133	408.658	456.167	529.168	560.138
383.07	21.3532	33.5872	29.7143	29.7577	32.045	44.2271	54.0105	72.698	109.31	174.207	84.0416	144.366	207.947	239.258	324.086	380.906	436.791	487.27	274.707	538.548	580.598	594.19	596.771	576.196	359.411	402.279	449.396	521.472	554.445
384	23.863	33.1336	30.0431	30.8319	32.6794	44.7201	55.0466	73.0001	107.688	169.55	83.7246	142.243	208.202	237.009	319.248	374.186	425.491	477.453	272.364	527.812	570.82	582.267	585.681	572.209	353.935	396.046	445.682	515.774	548.599
385.07	25.7049	31.62	31.2165	29.3815	34.0955	47.2412	54.8565	71.6788	108.972	169.949	85.3784	140.841	206.251	234.616	309.373	362.229	417.5	465.472	266.796	521.117	559.048	568.58	574.183	561.863	350.905	389.208	439.51	510.152	539.869
386	27.2935	31.8458	31.6005	30.9896	34.7554	50.0189	53.4791	72.2901	109.712	167.973	84.2594	138.32	202.715	231.949	304.143	354.852	411.02	454.799	262.475	506.152	548.736	556.229	560.66	555.196	346.309	383.573	432.984	497.42	530.001
387.07	27.1266	31.8356	34.0935	32.0451	36.4189	54.195	54.4044	72.5887	108.849	167.324	81.2312	140.464	200.654	229.983	296.539	348.781	404.646	450.085	256.127	497.428	538.159	546.169	551.808	547.509	339.753	377.354	428.052	485.1	516.23
388	27.0821	32.5187	34.3684	36.4426	39.1533	56.5536	56.6572	73.398	109.091	164.424	81.9681	138.79	198.669	226.206	290.29	342.63	394.211	442.671	253.467	484.15	524.575	531.525	542.004	539.51	332.308	373.376	422.513	475.06	507.933
389.07	26.7399	32.2379	36.5016	38.1876	41.7478	57.8149	53.939	72.8568	108.731	162.832	81.1395	139.825	192.997	219.209	281.693	335.303	387.513	432.847	249.737	472.479	515.727	516.226	527.96	527.165	320.022	362.715	415.496	461.709	494.642
390	25.4827	32.2843	39.0327	39.5995	42.9894	59.1908	51.5866	69.415	109.367	162.898	81.9524	137.186	190.961	214.836	273.574	330.059	380.665	424.958	245.302	460.416	504.41	503.103	519.371	517.566	312.611	352.03	408.634	449.39	480.746
391.06	26.1616	32.7697	40.3483	40.1144	43.6449	58.0046	54.7213	67.8404	106.582	161.456	81.6186	134.658	186.13	207.729	265.077	321.532	375.512	414.932	241.867	443.36	490.158	492.818	511.222	508.404	304.599	339.921	398.442	433.81	467.437
391.96	29.1951	31.7008	43.3245	41.2802	44.2655	59.0895	53.7813	67.2142	103.941	161.099	82.8557	131.375	182.059	202.312	257.376	315.947	366.829	406.3	238.773	434.267	477.552	483.443	497.942	499.705	295.887	334.186	390.312	420.505	455.735
393.03	28.4833	29.9019	42.4066	42.6517	41.9996	59.0627	55.1948	66.8646	102.314	159.275	82.8148	127.664	182.433	196.403	250.089	306.993	359.479	396.52	231.331	421.413	464.685	468.738	485.155	490.341	287.826	326.435	381.139	409.744	444.562
393.93	29.0225	30.2804	43.1669	46.2269	43.8577	59.0378	54.439	63.6391	101.866	155.366	84.0916	127.047	180.946	190.005	242.219	298.437	349.955	385.826	225.366	407.331	450.968	458.343	472.252	477.33	278.101	317.308	365.874	400.882	435.169
395	28.5492	28.7431	43.8508	45.5128	44.2787	58.7868	52.9495	60.3772	100.299	152.677	84.3887	124.35	177.085	186.16	236.866	289.475	338.288	372.809	217.429	388.879	433.573	447.381	457.578	464.596	271.121	306.025	352.923	389.518	419.527
396.06	26.1621	26.1007	41.0303	45.3621	43.2948	56.2912	52.4688	59.3662	98.1293	151.226	83.4474	122.422	173.687	182.125	228.415	282.975	330.742	359.507	212.293	373.542	417.655	438.482	442.543	449.762	264.505	295.952	342.693	376.948	408.204
396.96	25.6212	26.2507	42.7782	47.6446	44.6779	56.4846	52.594	58.0349	97.6664	147.385	83.6957	120.694	168.304	179.917	222.434	275.14	322.024	350.656	206.21	362.457	401.547	428.703	430.43	437.357	258.418	287.423	325.731	363.216	396.392
398.03	27.3134	26.1586	39.8161	46.2921	44.4256	56.9638	52.6332	58.789	96.4837	143.767	82.1473	119.889	164.497	174.879	217.324	267.203	312.31	340.568	198.082	353.168	385.716	416.27	415.449	424.15	251.969	277.882	314.034	349.078	383.464
398.93	27.0502	27.7615	39.7634	46.4902	47.4768	57.1938	50.7495	58.8788	94.7914	141.172	84.6386	115.418	159.113	169.726	210.702	260.077	306.688	329.989	191.09	341.54	373.222	404.287	402.5	413.455	246.602	270.191	302.6	335.327	372.64
400	26.3261	28.4856	38.651	48.1543	47.1835	55.601	51.6757	58.0237	94.9452	138.122	85.6746	113.998	155.794	162.317	203.47	250.876	292.24	321.047	184.136	330.056	361.219	387.171	389.229	400.137	242.195	259.374	290.113	325.628	361.741
401.07	28.0751	30.9904	38.806	47.294	46.0002	53.1913	50.1256	61.7426	93.2491	133.508	85.5482	113.943	151.32	155.633	196.725	240.908	279.979	310.372	178.671	319.46	347.179	370.449	374.196	384.576	236.255	251.594	277.954	313.346	347.874
402	27.6114	31.2549	38.7511	47.0526	45.1123	52.5273	49.9744	60.1072	92.4997	128.879	86.0967	110.525	145.178	151.477	191.814	231.189	269.443	298.694	172.675	306.412	336.233	362.024	355.954	366.724	231.411	241.568	269.035	301.073	334.263
403.07	28.5064	32.6946	37.9461	45.2594	43.4822	51.0874	45.8939	59.7425	88.6937	123.755	84.3496	109.87	140.87	147.819	189.277	221.624	261.103	286.176	169.256	295.955	324.403	349.944	345.828	354.318	226.241	235.853	258.083	287.826	320.899
404	28.6112	29.4553	38.0431	42.2671	42.2731	50.6624	44.9365	61.2568	86.8839	120.375	83.0596	107.427	135.482	145.643	186.346	213.648	250.065	275.642	161.775	286.171	312.024	333.745	332.99	339.256	218.59	227.452	246.994	279.35	309.771
405.07	29.4215	27.4389	39.6108	42.5438	43.2414	46.7183	43.8243	63.7	83.0516	116.069	82.2514	104.788	133.798	141.403	180.42	204.269	240.542	264.897	158.778	278.18	305.235	323.336	322.182	325.035	211.97	218.242	237.98	270.643	300.055
406	30.3061	29.9734	38.0859	41.8934	42.6892	45.0476	41.7064	64.983	82.3017	112.582	81.7166	101.852	128.12	138.536	177.995	196.025	229.368	252.479	155.077	270.28	296.025	312.562	312.102	311.902	210.395	212.861	232.004	260.566	289.623
407.07	34.2009	30.4304	35.4629	42.3657	41.8214	42.3624	42.4046	65.2794	81.9918	106.958	78.398	100.759	125.049	137.349	172.857	190.659	220.118	240.228	148.3	259.818	281.355	301.374	300.979	300.471	204.221	209.537	224.854	252.228	277.393
408	34.2483	30.1141	36.0086	40.946	40.5457	41.906	41.3298	63.1318	80.4718	101.489	74.9764	98.0704	120.6	135.525	164.758	180.57	210.228	231.82	144.213	250.039	271.942	286.525	286.66	291.977	200.308	203.94	219.488	244.132	268.336
409.07	36.0856	31.5363	36.9309	41.5757	39.8381	44.6164	41.9573	65.3932	79.1553	100.986	73.6504	96.9662	117.52	131.298	162.256	173.714	202.687	222.084	138.628	241.82	265.205	274.887	278.471	279.885	194.902	197.034	212.563	236.197	255.57
410	37.6029	33.3699	34.9817	42.4218	38.9488	44.4392	41.394	66.3383	77.725	96.5491	68.1628	95.4372	111.688	129.098	158.727	167.729	195.729	216.757	132.076	230.287	254.043	264.866	272.025	270.893	186.379	189.464	206.575	226.287	244.483
411.07	37.1566	33.2146	35.9681	42.5965	40.5172	44.6458	43.4775	67.0599	76.2956	94.3995	65.3349	95.4841	106.42	125.949	153.992	160.408	187.517	214.954	127.944	227.841	245.282	257.541	265.763	263.145	176.397	184.189	199.572	217.882	232.879
412	36.272	32.6629	37.6113	43.0662	40.3638	44.3194	42.7925	67.6739	72.0141	91.0631	65.1332	89.9994	102.761	119.907	149.287	155.628	178.931	207.398	127.821	221.597	237.821	246.424	254.925	251.654	164.979	180.477	191.453	210.84	223.163
413.07	34.7726	31.5494	38.9302	41.82	41.1686	43.062	42.629	65.1978	69.9468	89.067	61.9035	86.4886	99.5569	114.732	142.695	149.857	172.966	200.36	125.362	215.835	233.181	237.321	244.309	243.954	157.457	174.638	183.537	201.615	212.802
414	34.3285	32.9294	37.3492	42.3153	40.0681	43.3048	44.97	63.4983	68.0483	87.6322	61.7586	83.3018	95.6998	109.849	138.19	143.677	166.285	195.781	119.443	209.503	222.691	230.213	236.883	236.223	152.314	169.316	176.156	194.156	202.294
415.07	34.5381	32.3096	37.2211	42.2385	39.7008	41.9545	46.6913	62.9165	64.1612	84.0535	58.8115	80.1075	92.2181	105.411	132.986	137.771	162.798	189.666	115.237	204.824	211.965	221.597	230.742	228.308	144.397	164.328	170.416	185.989	198.283
416	34.9874	30.8975	35.8553	44.0005	37.2647	42.0024	45.5985	61.4897	62.4369	81.0554	57.4565	75.8242	90.0849	104.336	128.138	132.488	159.819	181.947	110.658	195.716	206.699	215.688	227.321	222.428	138.253	161.328	167.644	180.917	193.005
417.07	34.7398	32.33	35.034	45.086	36.3104	42.3916	47.5606	58.5747	61.8857	77.3055	56.5978	72.0155	90.4665	102.242	122.836	126.417	156.352	174.084	106.33	189.387	201.434	207.005	223.104	212.769	131.308	157.259	162.861	174.428	185.013
418	35.3298	34.1192	32.8267	44.6171	37.5512	42.1167	47.4212	55.9557	62.7017	77.048	55.6251	69.2569	89.1035	101.571	117.722	122.457	149.961	169.262	103.345	179.922	191.719	205.47	218.969	205.083	123.472	147.757	154.089	166.783	180.844
419.07	33.4332	34.7147	31.2475	41.9619	37.7415	44.462	46.3675	52.3797	61.3204	74.6939	53.6012	65.3533	87.2524	99.9274	113.253	118.627	145.593	164.261	102.062	172.151	183.576	198.081	214.682	194.877	116.899	140.557	148.386	160.666	171.067
420	31.0529	34.9552	29.1071	41.4023	38.4077	45.6719	48.014	50.1658	58.2684	71.4289	50.8743	64.7132	87.7316	98.5987	107.959	115.803	145.325	158.676	99.5583	166.983	176.756	193.059	207.955	187.814	110.602	137.079	143.899	153.151	166.062
421.06	30.3101	37.2161	29.485	40.732	38.9507	46.9253	45.9039	45.3891	55.8312	69.5227	50.9133	62.9319	85.0631	96.9279	104.319	113.79	140.021	155.362	96.0918	162.006	170.545	187.334	202.645	184.937	104.452	133.566	141.033	148.991	160.685
421.96	30.4686	37.8092	25.4908	38.6704	39.8677	47.1944	44.535	43.2338	56.9139	67.3144	50.9528	61.3707	82.3525	93.8906	99.5207	111.711	135.073	148.301	91.3088	157.16	164.499	181.363	196.559	178.557	99.4067	130.358	137.059	143.53	152.311
423.03	26.1144	41.1426	26.489	39.7543	40.7155	46.4649	42.3117	39.5534	58.4491	64.2143	53.0713	58.3951	78.7003	89.7647	95.1659	110.672	130.821	142.636	90.7015	151.328	161.252	175.593	191.667	172.226	96.404	126.891	132.826	138.886	146.048
423.93	25.1216	44.19	25.5619	41.028	38.657	44.2291	42.4486	36.9949	57.5558	61.4811	50.368	56.586	75.9191	84.5392	92.7613	107.458	125.922	139.889	88.5015	143.831	155.898	169.414	183.923	163.945	95.5387	122.349	128.651	135.873	142.646
425	25.2471	45.7101	24.0069	38.8788	36.2368	44.7249	39.96	38.6424	55.7912	60.7333	47.5444	54.2565	70.4967	82.5946	91.4568	102.471	120.552	134.116	86.5349	138.89	149.847	166.216	178.577	156.913	91.4861	118.54	125.536	132.034	142.184
426.06	25.1336	43.5142	24.4969	38.1995	34.8855	43.3719	37.3377	35.0151	52.3405	57.7159	46.351	52.2312	68.4759	83.0557	89.8283	97.9235	118.179	129.233	84.4024	134.291	145.049	165.479	171.381	154.878	88.5632	115.053	120.262	127.572	139.432
426.96	25.4056	41.5875	26.5213	37.2473	35.0189	41.9975	34.3845	34.3841	50.6379	57.538	45.5348	52.319	66.8566	81.1083	84.772	97.6613	113.829	123.659	82.2855	133.157	139.69	161.548	168.911	150.716	86.7296	114.094	118.109	125.194	139.462
428.03	23.9838	39.337	27.8465	37.1197	35.5077	39.8991	36.3453	35.6612	51.687	55.1217	43.7956	53.752	62.8308	80.6639	82.0143	94.8659	108.94	119.367	76.3576	128.866	135.764	155.084	163.692	145.355	82.8446	111.739	115.438	124.158	137.247
428.93	26.6156	39.8234	28.9303	37.1564	34.2408	37.8015	34.8886	34.6517	48.923	53.7172	42.622	53.8324	59.4537	77.3976	78.5898	90.9551	106.487	113.917	77.4963	128.056	134.629	152.608	158.951	143.342	81.0613	110.626	114.256	122.537	132.584
430	25.4248	41.7644	28.4908	37.049	33.8655	37.7967	33.3672	33.9599	46.5036	54.3484	39.5578	51.6137	55.7872	74.9455	77.7616	86.7785	103.537	110.258	73.0869	123.373	127.205	148.755	156.61	141.61	82.97	107.147	114.294	121.072	127.544
431.06	25.8876	38.5313	27.683	35.8728	33.8448	37.2186	32.2354	33.8212	45.7047	55.6412	38.727	50.7677	52.8621	72.5764	76.7559	87.8444	101.81	108.864	70.843	118.279	125.584	144.669	152.726	140.391	82.3684	105.231	112.373	118.934	124.604
431.96	26.189	36.1847	28.5167	35.3793	33.506	37.9073	31.8251	35.8997	43.5271	54.6084	38.3126	49.4916	49.0986	71.3873	74.6598	86.5357	96.5061	106.632	68.0385	113.285	125.154	136.533	148.422	141.273	79.5985	102.743	108.734	117.893	123.218
433.03	27.6047	35.0434	31.1628	35.9849	33.1974	39.6098	33.5626	35.9308	41.9621	57.526	39.4333	50.5289	47.1457	69.1275	75.8792	82.0003	95.4078	103.219	63.8951	112.94	124.836	132.536	146.656	139.831	77.4627	100.447	103.855	114.847	118.518
433.93	26.9681	33.4344	31.5755	33.8043	33.8452	36.7562	34.272	36.6922	40.4848	57.5708	37.1718	49.9654	43.2337	66.0546	73.7231	78.6989	94.4391	101.485	60.014	110.633	120.203	129.217	140.217	139.759	75.666	96.2342	100.888	112.229	115.624
435	26.2194	29.6669	34.114	33.3106	35.032	36.5944	35.6693	37.2417	39.5889	59.1207	36.9269	48.7345	43.1579	63.3632	74.8883	75.4989	93.8658	99.5221	61.5326	109.933	121.099	125.666	134.087	137.388	73.0769	96.6589	97.1733	108.552	110.362
436.06	25.8014	27.9541	37.0032	31.785	35.5832	35.432	35.5645	37.988	36.9255	57.4409	36.644	46.4176	44.2462	58.1904	73.8422	74.6353	91.7504	95.6967	60.7776	108.383	118.858	121.288	129.143	133.059	72.9914	96.4587	94.6868	107.918	106.657
436.96	27.391	28.0468	37.1347	35.2681	36.2192	32.8539	37.9998	37.7491	37.9164	57.6509	34.7315	45.5488	43.9134	54.8325	73.3644	73.7019	89.6017	95.7095	57.6219	104.859	117.769	117.81	127.226	130.357	75.2058	92.9563	91.2242	104.145	103.939
438.03	30.0096	29.1149	37.57	36.1258	35.4189	31.1908	38.8282	37.6102	38.0784	56.0474	34.8058	45.9587	44.4248	55.2949	72.7953	70.8785	90.5699	93.5907	57.3713	103.745	115.43	114.105	126.917	125.225	76.0562	87.3643	89.2041	99.7267	101.271
438.93	29.7248	26.969	38.527	36.1407	36.0403	30.5181	37.7297	37.1182	38.0385	54.9694	34.7606	43.3591	44.9523	53.7276	71.7868	68.9768	89.9323	89.3067	56.8929	101.499	112.303	108.767	127.314	124.152	74.6568	84.4328	84.2459	97.7708	99.7182
440	26.9323	26.3587	36.771	36.6417	34.8611	29.1995	37.9655	35.7813	39.0288	50.8753	36.3942	42.0406	45.7077	53.2172	69.8937	69.082	88.0155	85.7657	56.73	97.6094	111.756	106.248	126.971	123.532	74.4742	81.4202	82.7372	95.6225	97.758
441.07	26.7391	25.5462	38.2142	35.6917	36.762	28.8402	38.9249	33.1124	41.9806	48.6376	36.4328	40.2863	47.793	54.2165	68.7408	67.7705	84.303	83.1841	56.3921	98.0275	109.277	101.933	123.261	120.184	71.9531	81.5993	79.199	94.0422	95.9106
442	27.6743	24.7748	37.7863	34.8488	36.5373	29.7334	36.9086	32.2477	42.489	46.3955	35.0019	38.2603	50.6299	51.1929	68.7001	68.915	83.9759	82.4627	57.5802	91.823	106.509	99.991	121.471	118.335	69.6216	77.4595	76.8785	89.2749	94.2276
443.07	26.4365	23.6784	37.113	33.7586	34.9712	31.5697	34.4151	28.6084	40.8974	43.6182	33.0801	38.1857	50.3373	50.4814	67.6516	68.6998	81.3627	81.2562	59.6521	88.9602	103.707	96.4288	118.605	114.231	67.2997	76.0648	76.4183	87.8594	90.9131
444	25.9299	23.7185	37.5979	33.9585	35.0629	30.6858	32.3742	27.6319	39.4422	40.6697	32.3202	37.7026	51.0958	50.0884	65.6503	69.2322	78.2553	79.9943	58.6591	86.9309	101.223	94.0722	114.875	113.431	65.7112	74.0005	76.3239	86.7518	89.7953
445.07	27.3511	23.8842	37.291	34.4141	33.5387	30.1777	30.0219	26.6666	39.1119	39.3521	31.5707	37.3119	49.2187	47.9349	63.9534	69.9392	74.8153	78.1595	57.2273	83.9765	98.9767	94.6454	112.99	111.172	66.182	72.4176	74.9513	86.6366	91.5093
446	25.0684	23.2039	35.9491	36.0673	33.306	29.9175	31.0521	26.3804	43.1084	36.9445	31.7644	36.6769	47.6256	44.6046	63.5161	71.5912	72.9313	76.1925	56.3116	82.6173	95.9323	94.3067	110.879	108.056	65.7672	70.5601	73.3342	83.6407	88.9034
447.07	25.4592	24.0906	35.0188	36.8996	33.0102	30.2863	29.1144	26.5681	43.7792	35.1019	29.1003	35.2934	47.2014	44.8918	64.8981	71.2437	71.9254	75.446	56.934	81.3116	94.4129	92.6814	107.548	107.404	66.4933	68.8698	71.1772	82.7909	91.7799
448	25.5918	22.9511	32.7062	34.8335	32.0391	29.667	29.4893	28.3224	40.5966	34.2307	27.3641	34.7645	45.973	46.1626	63.5034	69.4609	71.1834	73.7475	55.1689	80.337	91.252	91.7122	103.071	103.797	67.8223	67.3407	70.7154	85.1376	94.0121
449.07	25.5088	22.9309	31.0731	31.7933	32.9293	29.937	28.6012	31.8818	40.5699	32.9474	26.0351	33.2405	45.064	46.5715	61.7653	67.5274	68.7728	73.0481	56.0409	80.965	88.4294	91.9903	103.084	105.408	65.1577	65.5452	68.1578	83.6213	94.401
450	27.4386	21.6961	31.873	32.268	31.3854	28.7191	28.6392	29.9667	38.7036	30.4496	26.2293	32.4475	45.9464	46.7866	56.9127	66.564	67.3367	71.1382	54.8979	80.163	83.507	92.9801	102.279	106.719	63.9556	65.3018	66.5909	82.8756	92.4858
451.06	26.2453	22.4344	31.2888	31.8663	32.064	29.6579	27.8895	31.537	38.7696	31.8899	25.9298	34.811	44.708	46.3185	52.9843	64.7788	66.1562	71.8455	52.8599	81.4201	78.9731	91.3025	102.388	105.228	61.9747	65.3753	67.243	82.126	92.9888
451.96	25.7353	23.734	29.3489	30.8455	30.8458	29.8351	25.9435	31.8773	39.8128	32.0335	24.1259	35.23	41.9253	47.6065	52.6486	61.5591	66.6841	69.3798	53.1798	79.6469	79.2537	89.3135	99.2625	104.524	61.1722	62.6971	66.6379	79.9466	90.9413
453.03	26.154	21.478	27.7606	29.9422	29.7699	28.8499	23.6089	31.4168	38.2222	32.9889	23.7877	33.3667	38.6384	45.7271	51.5414	59.7786	67.3053	68.1273	52.801	81.6425	78.3673	89.7522	99.2457	105.253	61.2973	63.455	65.7338	78.1837	89.0205
453.93	25.7816	22.8843	24.904	28.8194	30.2104	28.3695	23.2141	33.1992	38.0668	32.7397	23.1614	32.1685	39.0984	46.7508	50.2223	58.4674	67.5891	67.7894	51.5367	79.1196	74.899	88.9787	98.1897	106.117	60.7538	59.6444	64.6366	75.9371	85.0015
455	27.8381	19.7722	25.5327	27.8171	28.4534	29.074	22.4008	31.8377	37.5452	33.7404	23.5422	33.8275	36.7501	47.0884	49.4607	60.0725	66.589	67.0364	51.8937	81.0219	79.556	88.0095	95.8587	106.052	60.4816	61.9715	62.2652	74.3644	83.559
456.06	30.2641	19.6825	25.0643	26.9052	26.7525	28.1237	23.715	31.703	36.5278	32.8928	23.7951	35.7301	37.2227	47.2162	47.0833	56.7279	66.4251	62.3632	49.7353	79.7744	78.7558	87.4725	94.0642	104.058	57.1821	62.1535	63.3028	74.2548	79.1713
456.96	29.6725	18.4961	25.7174	25.4095	25.6924	28.6553	24.7457	29.5468	35.2553	35.0999	25.0739	36.7923	37.505	46.2665	46.7808	53.8284	68.6241	62.3574	49.0174	78.6605	78.8871	90.2719	90.8763	104.244	57.739	61.4649	63.7194	73.8581	75.953
458.03	28.8135	19.167	25.9506	23.6255	25.9921	26.7493	23.6938	29.1458	34.7275	34.0454	24.0426	38.9941	36.096	43.9701	47.2073	53.6095	71.0457	61.6821	48.8552	75.3294	79.2063	90.994	88.4788	101.158	56.0316	58.3902	63.9074	73.2022	75.3154
458.93	28.8573	19.2057	26.7247	22.6861	25.3925	26.5878	24.8718	27.2381	34.381	35.2926	23.7844	39.8251	37.0282	44.1735	46.889	52.2336	72.6657	63.0295	49.8501	73.703	80.2125	89.0072	88.3035	99.5761	55.3451	60.0626	64.4809	71.2655	74.247
460	29.6142	19.8318	26.7868	22.7006	23.5836	25.3417	24.342	26.4594	34.3277	33.0225	23.7436	41.3504	37.7018	40.9759	45.6417	51.4606	70.9541	62.2444	49.936	72.0171	79.2139	89.0425	88.2502	96.4183	53.1522	57.5469	63.4601	72.1318	73.7283
461.06	29.0622	20.9541	26.8629	24.3293	23.3039	26.3963	25.9818	24.4251	35.0801	34.1808	21.8946	42.6817	37.4445	40.9578	44.2494	49.1955	70.7498	63.1589	50.8738	71.5433	78.5911	86.8113	89.255	91.8088	54.4136	54.1479	63.1903	70.7578	70.5169
461.96	26.394	20.1169	27.737	20.2836	23.5901	25.9187	27.2409	24.0864	37.0801	34.2695	23.0782	42.6111	36.7022	39.6151	43.37	46.2222	69.4332	61.9424	52.9972	72.0335	77.0627	84.3066	86.8864	90.0265	54.1343	54.2768	61.2245	71.9599	68.8063
463.03	24.1323	19.7301	30.0468	17.5451	25.0482	25.4611	27.3136	23.1041	36.4247	34.9688	25.3307	43.8458	33.922	37.249	41.7893	43.9421	67.2057	62.1425	50.429	70.3595	74.8727	82.9982	84.4553	90.0868	51.3901	54.3677	58.2616	73.2179	66.2399
463.93	21.7226	18.3589	29.9459	16.2702	22.0047	26.0407	27.7937	22.2066	38.8704	34.1548	25.9657	43.6007	34.725	38.2435	41.781	43.4726	65.1089	60.4978	49.8137	69.9577	74.8408	81.0255	82.783	87.4507	50.8393	57.9597	61.3137	70.7026	68.1855
465	22.5241	19.7886	30.7516	18.3527	22.2283	27.4194	26.8652	20.8056	39.802	36.5226	25.5084	43.1595	35.1448	37.6756	43.3653	44.0088	61.9853	60.1303	50.0699	69.1176	73.3986	80.2712	80.7022	84.7044	50.6279	59.0546	60.1276	69.8237	66.3704
466.06	21.3767	19.7459	28.9162	18.58	18.8743	29.4253	23.0612	22.0519	39.5149	37.5275	23.5607	42.3033	34.5712	36.4251	43.7766	46.4313	61.2403	59.6926	52.5008	66.964	69.9681	81.1933	81.3332	81.3339	51.6877	54.9912	59.9773	67.8263	63.5937
466.96	20.7859	18.4445	26.0235	19.2889	18.5233	28.9644	20.2384	20.6457	39.4022	38.2807	23.0399	40.7244	32.5667	38.2103	42.0801	46.6213	58.2444	62.6247	51.7849	66.1672	67.9107	81.3688	81.5196	79.704	54.4357	52.3102	61.2208	68.6974	62.9284
468.03	21.8899	17.7791	25.8469	19.6735	18.7525	28.1676	19.2928	21.3015	38.59	38.3734	25.6785	38.021	30.8308	35.9543	42.7036	46.5044	56.7853	61.0045	50.1369	64.1711	68.0161	80.5438	80.9825	77.1017	53.5858	52.4634	61.4056	68.2844	62.9926
468.93	22.5038	17.8207	23.131	20.8362	18.6635	27.8869	21.6438	22.2997	38.414	40.1171	23.1637	37.5902	31.4048	34.8762	44.1841	47.6518	54.107	59.589	48.1888	64.3577	65.9318	78.669	80.2605	76.0079	54.1585	53.6223	61.4751	68.6485	62.1815
470	21.4293	17.5491	22.7088	22.1011	19.9344	27.3788	20.012	21.1791	38.9522	40.2621	22.6894	35.1891	30.8873	34.8001	45.808	50.6279	52.1429	58.6474	47.1643	63.7182	64.0774	77.581	78.6972	77.5429	52.178	53.1963	59.7458	69.0394	59.3017
471.06	21.904	19.6186	20.6662	22.098	19.6372	27.6401	18.1503	22.7727	40.0483	39.7764	19.8803	33.5211	32.4964	38.0725	45.3205	51.7521	52.6817	57.995	47.3741	61.3606	65.8525	76.3312	77.65	77.7085	51.7634	54.0982	59.8884	66.5979	60.8186
471.96	20.4695	21.0858	19.403	21.773	19.6818	25.4862	18.9773	23.0708	39.9838	37.7088	20.9858	32.4511	31.8006	38.472	41.8142	52.9173	53.0261	56.7093	46.5622	60.5561	64.2417	73.6094	77.9786	77.571	49.7599	52.5029	58.9371	66.2587	61.18
473.03	21.6561	22.2251	17.7669	23.2873	19.5795	25.7472	18.6013	23.5	39.4021	37.0224	19.1069	28.771	31.085	37.1335	39.0539	52.6138	52.8556	57.9233	46.1154	58.2062	61.2327	74.7428	80.1362	79.0583	47.3003	52.7974	55.3134	63.4882	62.0883
473.93	21.0092	21.6068	17.2435	26.0917	18.3923	25.4828	18.8631	21.0035	38.6006	36.5648	20.6511	27.31	30.3133	36.2746	38.9407	52.1771	52.6238	53.5005	45.091	56.529	59.0361	74.4728	80.0643	79.7192	46.456	51.933	53.3358	61.8182	60.4335
475	18.4158	21.4237	16.5249	27.3818	20.2061	25.7303	16.199	22.1452	38.6134	36.2584	20.7333	28.091	30.9088	35.6191	39.666	51.6206	52.6016	52.1016	44.8334	56.6793	56.8183	73.8233	79.5031	79.1141	44.59	51.911	50.6983	59.2363	58.4679
476.06	17.1849	21.6271	15.6299	27.8795	20.0665	23.914	14.6933	21.7686	39.86	33.4896	18.165	27.2537	31.0637	35.1006	40.7344	52.3703	51.6579	49.3894	44.1641	55.2377	58.4445	71.659	80.2671	75.524	45.5521	49.7751	48.6858	57.5447	55.5818
476.96	17.8576	21.9028	14.6099	27.3051	19.7372	22.0284	14.7626	22.8944	37.6637	30.7797	19.7029	24.8828	29.6643	32.7768	40.1034	52.266	49.8195	47.6695	41.863	56.2701	56.5867	68.858	80.1798	75.7271	43.2256	51.0841	45.7368	57.1534	53.387
478.03	18.0051	24.9881	14.2624	28.6938	19.2626	20.4077	14.8501	24.2486	34.5029	28.4257	18.1006	22.9765	30.4053	32.7869	40.9964	49.7281	47.9975	46.2166	42.6806	55.3212	57.2356	68.9072	79.9025	74.1614	41.9858	50.4588	44.8441	56.1689	50.5436
478.93	17.1968	23.1668	16.3313	28.1684	18.6206	20.7664	15.2808	23.8463	30.7456	28.2061	19.0961	22.5213	30.9238	32.5188	42.1438	48.1877	48.1616	44.5069	41.1565	54.9795	59.9051	68.3197	77.6759	73.5284	41.1787	52.4624	44.4444	54.0437	50.6427
480	17.1306	23.4245	14.8826	27.2207	18.3386	20.5542	13.889	26.4797	29.3407	25.5099	19.2037	21.3511	31.7521	31.9821	41.4326	44.9426	48.0498	43.2385	40.5848	51.8412	56.3076	69.2793	77.0207	73.0426	40.7461	50.747	43.6181	52.1419	49.4005
481.04	16.1216	23.0779	17.6971	27.6915	19.806	23.4631	13.1812	26.446	26.3368	23.7856	20.0488	20.8143	30.1586	32.6527	41.5808	43.9775	48.3608	47.0747	40.4617	48.8332	56.0292	67.8006	73.5771	71.443	41.0536	49.6782	41.9723	51.9144	50.5256
481.94	14.8833	22.0153	17.8993	26.9076	19.5336	24.8101	12.4648	25.8577	25.4144	22.8765	20.8448	22.7337	29.8703	32.226	44.0212	43.6145	49.6094	49.9645	40.6001	49.0962	57.9401	65.4566	72.1232	68.8729	38.3253	46.0036	41.1227	50.353	50.6545
482.98	13.3414	23.0278	17.2131	27.2996	18.7934	24.8047	15.3092	25.0379	24.5254	20.8666	22.5847	24.1232	31.9769	32.8853	44.3514	40.1265	49.0659	50.0629	40.3086	49.9181	57.0806	64.091	70.3834	69.1012	37.006	47.032	41.6256	48.7456	49.5144
484.02	11.8837	22.7017	18.7469	26.608	20.5734	25.6093	15.187	25.0154	24.3247	19.528	24.2536	24.4112	32.3434	31.2243	45.355	39.0814	47.1533	49.041	37.8465	50.5334	57.2087	61.2629	66.6568	65.1321	34.3227	43.8566	39.8063	47.8922	47.2088
485.07	9.76031	21.8241	20.2987	24.4974	21.6683	26.7639	15.8948	23.2579	24.2019	21.4279	24.2763	23.5103	30.6871	30.5027	44.9926	36.6992	44.7815	47.3247	35.4251	54.5001	57.3333	60.6999	64.765	62.8946	35.1322	42.2318	40.2603	48.6783	45.7252
485.97	12.2927	20.5556	22.8041	21.6192	21.8984	26.0842	16.3214	25.0625	24.761	20.3893	25.4131	23.3309	28.4224	30.4561	45.8204	37.0557	41.8548	47.4097	35.1334	55.3852	55.7166	59.7518	60.2265	62.8269	34.1534	41.523	38.7049	49.6797	47.7176
487.01	14.2644	20.7629	25.3283	21.8352	22.3041	26.9724	16.3437	24.1523	24.5334	19.6539	25.9383	25.6935	27.9806	32.8348	46.5132	38.9185	41.5403	46.2458	33.3988	55.4519	55.3098	56.2334	58.4621	61.2578	32.2054	41.0678	39.6306	48.8973	47.6913
488.05	14.4	20.0352	23.6906	21.7394	21.0446	26.5669	15.4908	23.9405	26.1826	20.5828	25.8334	23.8813	28.6543	33.6053	48.2883	38.9959	39.2117	45.3633	32.5273	57.0476	56.3573	52.6848	57.4325	59.4068	33.1989	40.2699	39.9773	47.3222	49.1466
488.95	15.5012	21.475	23.762	20.6693	19.013	25.1216	15.4744	22.3749	26.0084	20.8271	25.822	23.9408	25.8741	34.1312	46.988	39.5416	37.3935	46.2284	32.1465	56.4995	55.3432	52.0767	54.2911	59.4858	33.743	36.4983	38.7375	47.4463	46.2062
490	17.6817	20.4237	25.3745	17.5601	19.9353	24.2041	14.2574	22.6421	23.9125	19.2685	24.6806	23.7703	26.3132	33.4192	43.9896	39.1399	36.3899	46.0244	33.1672	56.7366	53.358	53.1187	52.1535	55.8796	34.4969	35.0688	41.5634	48.146	44.2736
491.06	21.2468	19.8615	23.9576	16.8464	20.6637	22.4913	15.5528	23.0894	22.8958	21.2055	25.3947	23.7451	26.8129	33.6185	42.8566	39.7671	36.9655	47.7822	31.7119	54.9986	54.4513	51.3696	52.2245	55.1678	35.0414	34.5242	43.4022	49.1309	44.7963
491.96	22.3447	19.4968	23.5074	16.2143	20.6685	21.7828	17.0545	22.8797	22.6643	20.4716	25.2675	24.6956	26.6132	32.26	42.0832	41.6616	35.6021	44.2695	31.5383	52.713	54.5829	49.5964	51.3682	54.7092	32.914	34.9772	43.7144	49.1456	44.5104
493.03	22.3761	19.8612	23.7084	16.4925	19.8098	21.239	18.879	21.7883	25.2108	21.7369	22.4324	25.1498	27.9348	33.4028	39.0669	43.8693	33.5376	44.4038	33.4651	52.5795	54.1231	49.46	50.4777	55.5259	33.8921	34.7669	42.6549	50.2072	44.7084
493.93	21.8133	18.8961	24.4586	16.8793	19.9597	20.585	18.1734	20.3022	25.9853	22.2709	22.313	25.3266	27.8632	32.8196	37.9434	46.2933	35.7957	42.8988	32.1985	50.0709	54.9478	51.5181	48.0384	55.4973	32.467	35.3986	42.8468	51.9813	44.1267
495	22.6994	17.5334	24.5723	16.5301	16.7905	18.0213	19.4174	20.4016	28.9223	23.3797	21.418	23.9764	28.5546	36.2767	34.9998	48.2012	37.944	42.5543	33.2023	48.2027	55.7585	48.9307	46.9714	54.5765	32.7729	35.2736	42.4407	50.0116	45.3092
496.06	24.2691	15.8009	25.1557	15.5227	17.3358	16.5558	20.349	18.7589	28.8749	22.7537	20.8464	23.9875	26.8258	34.2122	32.7543	49.9631	38.0681	40.5323	33.2328	46.8266	52.9175	48.6069	44.5919	53.1416	32.8698	32.6202	39.018	49.8225	45.4516
496.96	23.9284	13.2016	26.7387	15.1846	18.2733	16.4304	19.0538	18.9356	28.3731	22.9004	21.4618	23.1123	28.365	32.9512	31.9164	48.5961	39.772	39.7146	32.8943	44.2371	50.761	51.5387	43.6177	53.359	33.9909	32.5954	37.0819	49.5557	43.054
498.03	21.3927	11.8699	27.57	15.6039	17.6845	17.387	19.4904	19.7081	29.107	22.4754	20.8242	23.312	29.7918	32.2728	31.4328	45.3499	39.3086	36.1042	35.235	43.2062	49.7117	50.9106	44.0053	51.495	33.3559	32.0947	36.142	49.0601	41.9964
498.93	20.8267	10.7145	30.0324	13.4763	17.7824	17.4855	19.2222	20.4926	29.2412	21.945	19.7914	23.905	29.5284	31.3054	29.9335	44.0085	38.8278	35.9275	37.4562	41.8297	47.4324	50.1286	44.0906	50.7257	33.5038	32.3741	37.7306	48.0325	41.6929
500	18.1141	8.52736	30.4909	11.7924	17.4862	15.9797	19.4028	20.2585	28.0884	20.0965	18.913	23.4746	29.1219	31.8123	28.7172	41.2484	39.9316	34.5814	35.8161	41.732	46.8474	48.3071	43.5518	47.717	34.6886	32.0214	37.3845	48.2049	40.4026
501.04	16.9046	8.81133	29.939	10.7801	17.0422	16.1446	19.963	21.9062	25.7868	19.7805	21.0557	20.7109	27.2484	31.6561	28.2946	37.7515	41.0766	34.0938	34.8572	41.1408	44.2141	49.0547	41.2776	47.6066	32.5001	32.9421	36.3042	47.2671	40.8337
501.94	13.3191	9.38132	31.0247	11.0183	20.0333	16.1957	20.8499	24.2122	26.3328	20.8884	19.1984	20.2217	26.2058	31.4979	29.3708	34.8098	40.4032	34.0857	35.9591	40.4537	41.0847	50.4051	40.1391	45.9353	31.4851	33.0043	36.1045	45.4539	40.3019
502.98	11.88	7.87068	30.8081	10.4766	20.1042	18.107	20.6455	25.474	24.7805	22.4244	21.1139	19.3378	27.3403	32.4404	25.5079	34.8484	41.5645	33.9367	35.8537	38.2539	38.5537	51.004	38.7565	44.7226	30.2444	32.1664	36.9058	43.858	40.0258
504.02	9.3726	7.922	28.5633	9.01694	20.5229	18.1224	18.516	26.5463	25.1293	21.8246	22.2477	18.9052	27.1639	33.5012	23.7468	31.6011	41.1703	33.796	36.2909	36.1317	38.1535	52.196	38.7276	43.723	31.0698	32.4938	36.6337	45.1117	38.1016
505.07	8.02719	7.72522	28.869	8.69782	21.7356	18.6802	19.9817	24.2172	22.1507	22.9501	22.2274	18.2153	27.1235	34.98	23.4419	28.7871	41.2999	36.4365	34.022	35.9277	38.6	50.6177	35.3774	41.7155	30.0691	31.2076	37.6107	44.2173	36.6571
505.97	7.82495	8.44172	26.9476	9.58396	21.6955	18.8944	20.4274	21.3178	24.8437	23.683	24.8025	18.5582	26.7829	36.3902	25.2705	26.9436	41.5206	34.5508	33.4084	36.2024	38.3557	50.2319	34.895	41.3447	29.2911	29.5515	38.19	40.8355	36.6279
507.01	6.44396	10.206	24.2949	11.0808	23.1896	17.373	19.5801	20.5357	24.9095	24.2839	26.398	17.849	27.8972	35.238	24.5317	24.6648	40.8497	32.6312	30.6197	35.7328	36.452	49.7712	32.8812	42.3438	28.9701	31.6706	38.7741	39.2113	37.513
508.05	5.66688	11.2735	23.9045	11.3837	24.0051	17.3936	17.8376	19.1257	26.3796	24.97	27.5892	17.7204	25.6056	35.7722	23.0081	24.7274	39.1531	31.3386	27.6472	37.1761	36.9564	48.8308	32.6254	42.306	28.5418	31.0361	37.6721	38.2416	39.0466
508.95	6.86766	10.9165	23.2085	12.4434	23.541	17.656	16.7623	17.6751	26.2994	24.9462	26.9827	16.2896	24.3268	35.183	22.3083	22.801	38.5255	31.4152	28.1181	38.6526	35.5545	47.8641	34.4108	43.7047	28.0125	31.0613	40.5636	38.3987	41.4596
510	7.57406	12.6739	21.9928	11.7227	22.2272	17.2421	17.5951	18.1151	28.4282	21.3046	27.3157	17.1818	23.0352	36.0377	23.8528	22.279	39.2135	30.6447	25.3605	35.7425	33.5668	45.9657	34.6995	45.7598	29.3265	32.6895	40.3785	37.1062	43.5049
511.06	5.85338	14.4096	21.2789	12.1339	20.5982	17.43	15.443	15.8438	29.5737	21.7827	27.0316	18.2465	22.3801	34.306	24.9621	22.4477	39.4348	30.7977	25.4231	35.9697	33.3102	43.9426	33.3941	46.7973	28.9618	32.4482	40.2504	35.9467	40.5489
511.96	5.8457	18.1721	20.1627	10.9245	19.4302	17.8786	16.4627	15.0002	29.1787	22.83	27.2237	18.9847	21.715	32.1994	24.2382	22.4179	39.7646	31.7629	24.7789	35.836	33.1539	44.127	33.1812	46.8877	29.3374	31.0684	41.4971	35.0022	39.5097
513.03	6.35597	17.3894	18.7444	9.18579	17.3008	19.3029	15.8895	14.734	26.2251	20.8878	25.4885	20.1546	18.922	31.1906	24.6045	23.4095	38.7067	31.1216	26.7918	34.7076	34.0539	46.2021	32.7981	46.3879	28.8214	31.5598	41.9067	34.8713	38.5881
513.93	6.70227	17.2125	17.0421	9.20279	19.077	19.6149	13.962	14.2143	24.4216	19.7855	25.5119	21.8037	19.8108	28.0815	23.676	25.5705	38.53	29.42	26.7972	34.6083	32.5568	45.3862	33.3257	43.9461	29.6161	31.9145	42.5139	33.4971	38.3441
515	6.15016	16.5101	13.9067	10.559	17.7314	17.811	14.0841	14.924	24.6402	21.7663	27.6804	22.5713	19.1078	27.4226	26.4322	28.2935	41.0018	30.1556	25.5352	34.194	33.6364	44.6942	34.5379	46.1956	29.4525	32.5249	41.3842	32.9175	38.1851
516.06	8.15013	17.9089	13.8025	13.1333	17.3168	18.5746	13.7099	13.857	24.2254	19.9223	28.3069	22.9653	18.4674	25.4635	25.5666	29.8197	39.7497	30.7015	26.2397	32.393	32.0101	43.6734	33.5976	47.4577	29.995	33.089	40.3768	33.928	38.7531
516.96	7.51313	18.4491	13.8733	14.9784	14.7895	18.4958	12.3491	15.1572	24.3271	22.3473	26.8653	21.3428	18.809	24.8818	27.8817	29.5851	39.5145	31.4161	26.1243	33.0078	34.2216	43.6362	32.2346	46.023	30.3296	32.8512	38.7377	34.5091	36.5133
518.03	8.65105	19.1594	13.1817	15.0926	15.3163	18.6309	12.3598	16.9164	23.486	21.9477	25.0634	23.9818	18.9349	24.33	28.0134	31.8623	41.1264	29.5677	25.4122	31.8824	36.7698	43.0181	29.4899	45.286	30.2552	34.6146	37.1376	34.7285	36.1973
518.93	10.3058	19.6149	15.8082	14.8811	13.6339	19.1263	10.1224	17.2045	22.9551	21.8432	22.7179	22.9134	19.3655	24.5537	26.3547	33.8572	40.409	29.4783	25.6311	32.4632	36.7943	40.6915	29.9991	44.1399	28.7062	32.6833	35.1986	31.7917	36.0391
520	11.6934	20.3448	17.5535	16.3748	14.4151	21.6426	10.5163	16.6952	20.0918	21.1353	19.7447	25.1762	21.7368	21.3068	27.1341	35.3543	40.5613	28.7252	27.5896	31.9574	35.8258	41.4689	28.2424	41.4417	29.5975	31.9184	34.5105	31.577	32.6145
521.04	12.5195	19.4871	19.6523	17.0651	13.1161	22.2511	10.0696	19.5714	20.6837	21	18.3696	26.1204	23.7281	20.0674	27.8286	35.0277	39.2971	28.5316	28.3506	31.469	35.7282	41.1854	28.5701	42.8801	29.1293	31.8805	32.9919	31.8083	32.6372
521.94	11.3668	19.6807	21.5054	18.0943	11.235	23.7437	10.253	19.7413	19.0899	19.939	14.1452	25.0617	24.8164	21.2577	27.1589	34.881	36.2625	29.9663	28.7822	31.7819	37.328	39.6467	28.9929	42.2953	28.6234	32.1767	32.7097	31.4018	34.3576
522.98	11.7411	18.2088	25.6045	15.5525	10.0154	21.6628	10.1696	19.6804	18.0556	18.4935	15.0255	26.3604	24.1367	22.023	28.3665	36.1213	35.702	29.9997	28.3376	33.241	38.3439	38.7177	27.2655	41.877	27.149	30.0777	34.1002	30.1198	32.574
524.02	10.8265	17.2613	24.8995	16.0848	7.95926	22.0145	10.1276	20.6542	17.2782	16.58	15.3228	26.8807	26.0765	22.3716	26.9953	34.0409	36.3419	30.2828	26.3317	35.431	37.2013	40.6314	26.5592	40.3878	25.0728	29.2235	33.5049	32.6888	30.7751
525.07	12.3044	17.6774	24.4319	16.4252	6.46277	22.3025	10.0484	22.7861	15.4493	18.0518	14.9821	26.4844	25.844	21.8076	26.5319	33.57	34.7473	29.9404	25.0757	35.4067	36.0018	40.908	25.951	38.945	21.8368	27.8018	32.1982	33.9335	31.1977
525.97	11.6256	17.8696	25.6293	16.6165	7.69479	22.8008	10.8998	23.6102	15.8192	17.2967	13.5803	27.6795	25.3915	20.8276	25.7208	32.8191	33.3777	29.5904	24.586	34.7994	36.524	40.7193	26.0051	37.1648	19.9711	29.5196	31.5336	35.1865	32.1466
527.01	12.0016	14.9799	25.3313	17.0818	6.28974	22.3623	12.1577	22.4766	14.3718	17.546	14.3855	26.4467	25.9988	22.434	22.5649	33.2432	33.532	27.7279	24.019	32.9793	36.8064	41.6589	26.2838	35.8354	19.3853	30.5554	32.1428	34.5286	29.398
528.05	11.6198	13.9462	24.7079	16.7254	6.15211	21.9474	11.4098	21.4577	14.1964	16.6854	15.3403	25.3026	25.8892	21.317	23.2082	30.096	33.6747	27.5694	23.551	32.2514	37.5985	40.7201	26.9649	35.9812	18.8044	30.5005	31.3307	34.4701	29.3624
528.95	13.5033	14.0962	23.8735	16.8436	5.91022	21.3794	12.8559	21.5556	13.3959	18.0282	15.4674	23.0518	25.6921	21.987	22.7805	28.8912	33.4219	26.3115	21.6569	33.4313	36.4317	38.6377	27.3908	36.1257	18.4448	29.1624	29.0636	33.3937	29.383
530	14.6336	14.3306	23.4563	17.3839	5.69477	21.3035	11.5151	21.6544	16.6996	18.7865	16.4947	24.1633	25.6875	21.4854	22.4573	29.9523	33.8361	25.1511	22.5918	31.8697	35.3479	38.584	28.2536	35.734	16.607	30.3586	26.5267	32.5737	31.23
531.04	13.3157	13.4475	22.8084	17.2247	5.71449	20.3394	10.5626	22.5253	17.1094	19.925	16.4949	24.0754	26.129	20.2761	21.1006	31.8426	35.23	25.4421	23.9425	32.4326	34.8582	37.9547	28.5427	36.6345	15.4238	30.1739	25.0178	32.6482	31.8685
531.94	11.7085	14.4582	22.4689	15.5531	5.53501	18.8145	11.072	22.0542	18.8046	17.7288	16.2524	24.8653	24.9266	22.4123	21.1885	31.1158	35.8955	21.5322	25.1304	31.3735	33.9865	39.2676	29.5478	36.2196	16.5058	29.7612	23.7683	32.086	32.8682
532.98	14.1074	12.9384	20.4783	14.6702	5.54572	17.0353	12.2167	21.5436	19.1023	18.3351	17.0769	22.1178	25.0039	20.708	21.739	30.2811	36.4756	22.4664	26.2265	28.7577	31.3665	37.5166	30.078	35.421	16.2427	29.7966	23.8732	32.4942	32.6245
534.02	13.8894	15.4497	16.622	12.712	5.43536	15.2598	13.5987	21.5967	19.7193	16.9944	18.5885	20.0773	20.9803	21.5037	22.5555	29.895	36.527	20.4441	25.2095	27.5982	30.156	37.1419	31.5155	34.0438	18.1261	30.6222	22.8707	32.0263	31.1815
535.07	13.2042	14.3881	16.8024	13.3159	4.30324	15.8765	13.1316	20.9512	18.8902	17.4884	17.5068	19.569	19.7822	21.8445	23.5678	31.6266	35.5612	22.8531	27.315	28.4363	29.1439	35.1776	30.5965	32.8483	15.1038	30.8053	22.5572	32.2194	28.7363
535.97	13.4508	14.6583	16.9937	12.1775	4.8028	15.5278	15.5238	21.7944	19.3564	16.3346	17.8531	19.578	19.0348	21.5526	22.9032	32.2332	35.1244	22.874	28.0714	26.5729	28.6989	33.0968	30.2567	32.2064	13.8628	30.1029	23.155	30.5678	29.6745
537.01	12.9296	12.3216	15.1325	11.0831	6.10109	15.6151	13.3574	22.2302	19.3192	15.8453	16.8217	17.7932	18.0336	22.1707	22.1202	29.0758	31.5487	20.4532	27.887	25.6901	25.7506	32.5654	30.7658	32.7233	13.5129	29.578	23.5095	29.8398	29.7296
538.05	13.4255	12.8992	13.1786	10.0689	9.44138	14.5655	13.3045	22.2039	20.6693	15.3986	18.639	15.8873	18.1779	22.2198	21.0093	29.8125	30.273	20.801	26.7977	24.4574	23.2372	29.7752	28.5938	32.8551	15.2246	29.3557	21.8386	28.7583	31.7373
538.95	13.1245	14.5713	12.8899	11.6892	11.1783	13.5649	14.346	22.9476	21.9975	17.452	19.2976	13.5635	17.6308	24.1092	21.7889	29.4131	30.0708	20.7364	26.3872	25.2591	19.862	29.1624	26.6141	32.4307	17.3535	29.5815	22.3243	28.5438	33.3192
540	13.2697	17.3105	9.80906	13.4147	11.414	11.4212	13.8387	24.1523	22.1537	18.1631	19.8053	12.0744	18.0962	23.8912	19.6829	29.0635	27.8901	20.2196	25.4391	22.1876	19.0105	25.3314	25.2345	30.295	18.0023	27.1346	22.1434	28.5412	34.0307
541.04	11.8052	18.094	8.74121	11.4548	11.5105	11.3133	11.6896	25.7764	21.3827	18.3232	18.6143	10.7284	18.6764	23.292	20.0681	30.0976	26.8331	19.6702	25.9115	21.6567	20.1058	23.6086	23.9706	29.8831	21.187	27.4992	22.7537	27.2332	32.6518
541.94	13.4604	17.2065	7.56765	9.57935	14.4449	11.032	12.4197	27.0162	22.1405	18.215	17.3784	10.9502	17.9855	23.4481	18.0573	30.7019	25.7719	17.4748	27.9745	21.5918	19.6971	19.6001	21.359	29.1095	22.3233	29.0085	22.6179	27.2123	32.5681
542.98	13.0785	16.7833	8.25665	10.8076	15.7135	10.6599	10.1184	27.1081	20.5477	18.6116	17.1297	8.23051	20.6611	22.5633	18.1658	29.8257	22.9979	19.1968	26.1437	21.7771	19.0466	18.9117	21.097	27.781	22.5173	28.1975	23.3169	26.7469	29.5339
544.02	14.0167	17.0196	7.55255	12.2698	16.1418	8.7971	12.1388	27.3897	20.7612	17.5815	16.268	9.27828	21.0223	21.9043	19.7215	28.8509	20.6582	18.8323	28.4476	21.8036	17.1549	20.1536	18.6648	27.1155	24.2522	30.1749	22.1304	26.6559	28.7809
545.07	14.3549	16.7588	8.41106	11.9691	14.3205	8.76975	11.4755	29.0052	19.6836	17.2999	16.8133	9.80722	20.4918	23.1954	19.4686	28.673	17.6228	19.3366	27.4808	19.7433	17.9947	19.8329	19.085	28.2734	22.7505	29.9006	21.5876	26.6816	31.3498
545.97	11.3527	16.8906	11.1181	13.5282	12.9438	9.63707	10.5581	27.1953	16.2482	15.7018	16.993	10.601	22.4507	23.9169	16.4374	26.8503	15.6557	18.334	25.8331	20.3436	18.8533	19.0675	18.4449	27.4957	22.2583	28.8587	22.2389	27.9863	30.5564
547.01	12.8096	15.9159	11.9233	12.9497	11.6719	10.0887	9.92995	25.8185	14.6068	15.0261	18.4261	12.787	21.8149	22.3294	17.0235	23.6787	16.8788	18.7901	24.7898	22.4701	18.048	21.2552	17.1539	25.9818	21.6471	26.2663	23.593	27.862	28.0808
548.05	13.908	15.8043	10.9876	14.1366	11.4365	11.6646	9.77997	25.4489	13.759	12.7211	17.5575	13.827	21.6626	20.5052	15.6302	22.5793	17.3484	20.8302	23.3493	21.1254	17.7287	22.5087	18.0097	25.6395	20.9178	25.9323	24.5405	28.859	28.3681
548.95	11.6569	15.7859	12.0351	17.5138	10.0695	12.0257	10.4039	24.8582	12.4764	11.9358	14.733	15.4393	21.0229	20.0254	16.8959	23.0114	16.8672	21.0467	22.4493	19.2609	18.3152	22.3223	17.4493	25.9373	20.4087	26.1148	23.2989	28.6525	29.4136
550	9.7355	13.5664	12.5771	17.5515	10.7895	13.045	12.3033	23.3015	13.1714	8.6068	13.9442	15.7709	22.0371	19.583	16.7757	21.8304	17.2042	21.8425	22.0389	19.9173	18.1311	22.8736	19.1015	26.1013	19.1681	26.3432	23.8259	27.4927	31.1413
551.02	8.22421	13.6491	12.6424	19.2587	8.99229	13.8907	10.8514	21.0835	11.5977	8.44118	13.4507	16.6607	21.6794	19.5201	16.4481	22.5482	19.0103	21.4742	22.9107	18.8939	17.7245	22.9978	20.1095	25.2603	17.3981	24.704	24.729	26.4349	29.2764
552.05	6.94848	14.8676	13.0076	19.0557	8.66229	13.5923	9.42703	21.8969	13.3597	6.58516	12.6902	17.0903	23.575	16.5661	16.7892	20.5338	21.6257	20.8106	24.893	19.2418	19.4454	23.8392	22.6353	23.7283	15.9786	23.7769	24.2287	28.617	30.7107
552.94	7.37087	14.4003	13.9339	18.1066	7.98071	13.8364	10.1553	21.582	13.4129	6.06922	12.9282	17.9451	22.3873	17.404	16.4547	21.2637	23.1276	20.7369	24.3978	19.9065	20.0359	23.8741	23.9249	24.3245	14.2179	25.0672	21.4181	27.9923	28.3935
553.97	7.66337	14.0598	13.9074	17.502	7.23783	13.9374	9.35359	18.4735	14.2335	8.5736	12.0662	20.2513	22.6317	15.3097	15.7675	20.6448	24.3733	22.0856	26.0899	19.3255	19.5944	24.314	21.961	23.4417	13.0531	24.9732	21.7671	26.8901	27.0518
555	6.65346	16.0114	14.2022	17.0924	7.50971	13.5764	10.7165	17.3729	13.9955	8.89962	11.5991	20.5897	21.1243	16.2292	17.438	19.4573	26.576	21.103	26.0763	19.5058	20.576	25.5965	22.3217	22.0528	13.5349	22.1432	22.8996	24.844	25.0206
556.02	6.57657	15.5651	13.3572	14.9057	9.1195	13.2725	11.3155	16.3208	14.3169	8.27778	10.5648	21.888	19.516	17.068	18.4907	16.9384	27.234	19.792	25.3208	19.0395	21.106	27.0533	22.1115	21.3188	11.7224	22.6058	24.1192	23.4264	24.7797
557.05	9.2361	15.2822	13.6589	14.8339	8.47187	12.7803	12.1204	13.2834	13.924	9.49249	11.496	19.235	17.4306	15.7216	17.6402	15.48	26.8944	21.0735	24.6258	20.0106	20.0813	25.7397	22.8634	20.3649	11.4465	21.0059	23.4037	21.9897	24.1303
557.94	9.89791	15.7949	16.3843	15.0003	8.46	12.7031	11.7852	11.7674	13.8179	7.59155	8.7191	16.3339	15.2613	17.4936	17.5726	13.8808	25.7363	18.4261	23.5592	19.1388	21.5971	25.3118	24.8804	19.525	10.2475	19.9905	25.0445	19.7138	23.7782
558.97	10.4005	13.3632	18.0606	15.1063	7.3372	15.1373	10.9434	9.32611	15.941	7.13785	7.78786	15.5518	15.9471	14.3002	16.8757	12.7411	24.9327	18.0882	24.7607	19.3785	20.6078	25.8073	21.4668	20.0084	9.18291	17.714	25.8207	18.6242	21.8292
560	12.2868	14.6435	17.4081	12.7747	8.35122	15.7972	9.37375	8.56411	18.8403	6.20358	5.87464	14.5961	14.6167	13.5883	16.4743	11.7522	22.7936	14.968	25.8416	20.3166	18.7385	25.4419	20.9083	20.6499	10.497	14.2993	26.4003	17.918	22.789
561.04	13.0793	15.2666	15.9909	12.0864	10.2694	16.5717	7.94128	7.70901	18.9479	7.53739	5.73326	14.1457	12.8174	14.5244	15.7147	8.5581	20.6875	13.2986	25.3092	20.2379	14.9085	25.5906	19.8083	20.4489	12.3842	14.2669	25.9438	17.4279	23.1598
561.94	13.4634	12.5904	16.0637	12.9582	10.6218	15.9935	7.77175	7.63405	18.5584	7.34013	8.0004	12.413	12.4725	15.4842	17.0112	9.95905	21.3301	14.2175	25.1733	18.0894	13.6132	24.5514	17.3141	19.9476	14.0059	12.4297	22.9165	15.2822	22.8856
562.98	12.5321	11.6601	15.8169	13.3216	9.09328	14.4001	6.31826	6.63638	18.6603	8.6333	8.53824	12.1682	12.1309	13.2192	15.5473	9.1158	22.2359	13.2945	22.6449	18.5931	11.0556	22.9889	16.5726	18.6619	15.6355	11.3514	25.0615	13.0034	20.4786
564.02	13.2012	10.2799	15.6807	9.75809	10.2969	12.385	4.51352	8.51602	17.0111	8.75996	10.491	11.9353	11.3854	12.3278	15.3113	9.44591	21.0528	11.9536	21.9366	16.9713	12.0861	21.8215	15.8048	17.2694	14.189	10.6264	23.9134	13.3743	18.0039
565.07	12.4735	8.51723	17.5909	7.99306	10.8706	13.7934	2.16048	6.75055	17.1404	8.56713	10.8505	10.744	10.531	10.1966	16.3869	10.3672	20.6205	11.118	22.8742	17.5553	10.445	20.1309	15.4539	17.4859	14.4116	11.3143	23.0052	12.8089	16.1762
565.97	11.5578	6.27639	18.9979	7.07003	11.4155	11.2874	1.45142	6.94769	17.2947	9.71186	10.2236	9.72829	8.7555	10.5936	16.8594	10.0369	20.3777	11.3018	22.5941	17.9059	8.69028	19.8747	15.4811	15.69	12.1913	12.1635	20.529	13.7327	14.5013
567.01	10.1649	5.81487	20.0081	7.96055	10.4429	9.79472	0.500958	8.18229	14.892	9.76511	11.2829	9.90858	10.1991	10.6515	16.7754	8.96378	19.7271	12.0751	22.3341	16.9834	9.01276	21.2498	14.4522	13.1724	11.7394	11.7305	16.8345	11.7831	13.2878
568.05	10.1843	7.15139	19.8446	7.15367	8.3303	9.80392	-0.127092	7.28729	14.3989	9.90973	10.5825	10.4816	7.87117	11.9318	15.9265	9.0512	21.1581	9.71216	21.3419	16.8656	8.78939	21.0086	12.0397	13.3781	11.0421	11.7723	13.7084	10.7362	12.3462
568.95	9.29928	9.16658	19.3339	8.50384	7.06107	10.8052	-1.57035	7.78951	11.2164	10.41	11.3052	11.1488	8.7676	11.7341	16.0943	10.3589	20.7901	10.4499	20.7794	14.5205	9.12325	18.4168	11.5923	13.711	8.77773	10.0287	11.736	10.2498	11.3108
570	8.10532	9.68073	20.3461	8.94886	7.67399	9.35205	-0.848896	8.55715	10.1356	8.72409	10.3725	10.9512	8.46597	13.1761	15.9986	8.87879	20.5101	10.8049	19.152	13.4204	8.83245	18.1161	11.6339	12.9972	10.137	8.59476	9.73037	10.1895	9.9433
571.02	8.2562	9.8347	19.4231	9.35832	8.29017	6.13865	0.405882	8.67313	10.5176	7.20171	9.39026	10.8427	8.64198	12.5713	16.5525	9.68627	22.0532	13.9363	18.2765	13.0504	9.01069	18.4874	10.5107	14.6642	11.2516	7.15661	11.0554	9.14636	10.6874
572.05	6.86954	12.1768	19.4365	9.55264	8.03388	4.52123	0.519825	9.01765	8.86963	4.67674	9.31109	10.3401	8.37508	12.5297	16.1037	13.213	23.4883	13.7367	18.2159	12.9741	10.5498	17.6464	9.26705	13.9864	10.8345	7.13913	10.7286	8.35695	12.2887
572.94	4.54248	12.8844	19.7375	9.55468	8.54887	2.28502	1.34826	9.02849	10.0009	6.3878	9.04191	10.9094	10.561	13.8596	16.2049	13.2837	23.6568	12.7373	18.4341	12.6918	11.4522	18.4706	8.29543	13.168	10.9255	7.15154	9.67089	9.63998	13.3391
573.97	5.99363	12.2919	18.5217	7.22608	10.3746	2.28415	0.0270033	9.20085	9.18131	5.73613	10.1928	10.7037	11.8154	13.6022	15.1638	12.8034	23.9643	13.5105	16.7304	13.8064	11.7405	16.966	10.8317	11.6002	10.5767	7.13669	10.5437	9.43582	16.1768
575	5.52503	15.7274	17.9235	8.25072	9.78989	2.34389	0.035303	9.44738	10.7095	6.1694	10.4449	11.9634	9.51918	12.6067	13.6895	13.8205	24.7433	12.9291	16.1349	13.8834	12.161	16.8068	10.8293	10.4359	9.88102	8.31037	11.2516	8.94487	15.0062
576.02	6.37786	16.6487	18.0369	8.27329	11.244	2.13684	2.45227	9.36802	12.9752	8.44091	12.253	11.7234	10.9201	10.9485	12.7641	15.3936	25.6616	12.0345	15.3932	14.532	12.3972	18.2026	11.0884	11.1543	10.0912	9.66095	10.8397	9.58886	15.9533
577.05	6.68792	16.0954	16.2386	8.03215	10.7324	3.40392	4.83679	6.94313	10.5816	10.6774	13.9642	13.5679	10.1674	9.51732	11.2721	16.0808	25.2893	12.9676	12.7369	14.2528	13.3954	19.9729	10.7776	13.6847	9.89157	12.0561	11.6532	5.17784	14.9674
577.94	7.48932	17.0823	14.9417	5.81448	11.4494	3.5575	7.65371	6.20787	10.9764	14.0772	13.8565	13.0951	9.24474	9.90557	11.2919	13.6257	24.0085	12.3807	11.9862	14.5242	14.8419	18.8948	9.92988	13.4998	10.2856	12.8657	13.4281	5.13144	15.4205
578.97	8.98696	17.4513	13.4932	3.76758	13.802	4.16607	6.72084	7.23657	10.7687	12.2481	12.7669	12.547	8.89138	9.9275	12.7773	13.3486	23.1515	9.94752	10.2624	15.0912	17.0276	20.3983	10.7439	12.6036	8.06731	12.3416	14.106	3.01599	16.6485
580	9.13889	14.7719	14.0815	3.875	14.035	4.32466	6.94863	6.29994	11.6088	12.4721	10.8884	11.4736	8.58265	8.81382	11.9266	11.3872	20.8553	9.36197	11.013	16.758	18.0216	20.1628	9.24774	14.6648	7.20929	12.1979	15.3751	3.48859	17.0214
581.02	10.5207	15.5386	13.3638	4.16155	12.5938	3.31562	9.94075	5.95489	11.2348	13.1527	12.6163	9.54102	9.24198	7.18852	11.0693	10.5745	17.2785	8.71772	11.5821	16.5222	17.9072	20.4723	10.4517	15.9498	8.79659	11.368	13.9202	4.20365	17.5893
582.05	12.504	14.8615	12.937	5.06097	13.1354	4.27822	9.71537	6.49809	11.0539	12.7854	10.8335	9.49154	9.59029	6.14589	11.0866	9.54954	15.0796	7.22205	9.6277	17.2716	18.5107	22.1209	11.014	16.2112	8.26765	10.225	13.4482	5.95283	18.2275
582.94	11.3063	14.1365	11.7447	5.04572	12.5597	4.97023	11.7312	6.07709	9.31146	13.3581	11.3616	10.5254	8.45352	3.43569	10.5051	8.74343	14.2566	7.94959	11.1228	18.5457	15.5824	21.3781	10.7195	17.5759	8.23324	11.347	13.1146	7.57238	17.0258
583.97	11.3613	13.646	10.5835	5.0762	11.6007	5.46322	11.7677	7.62753	9.33602	13.676	9.27479	10.2849	7.4098	5.59717	10.6122	8.6942	10.8604	7.18257	11.2272	20.0943	13.874	21.2171	11.8123	19.0195	8.03541	12.1195	12.3111	9.06636	17.9514
585	11.9222	9.92967	11.6041	6.22617	10.9287	6.18463	11.1337	7.96167	8.25587	13.3443	10.0757	10.3396	6.25257	5.9367	8.90136	7.89003	9.06949	9.33012	11.3771	18.0048	13.2736	23.0272	10.2866	18.8246	7.94168	14.0696	10.3633	9.00899	17.1603
586.02	10.789	8.3434	12.8505	7.9824	8.08127	7.55183	10.8304	7.72622	8.4785	14.5683	10.2165	9.65952	5.89432	5.30677	7.83187	10.1562	10.6219	10.7136	11.5651	18.1557	12.4159	21.7322	11.1172	18.4457	5.16735	12.7109	9.32497	10.5462	15.517
587.05	8.69891	6.20117	13.0343	6.34639	7.07035	7.58009	11.3846	6.25809	7.81496	12.1481	7.39596	9.74335	6.02444	3.47115	6.91528	10.6128	8.71904	11.032	9.38563	19.5046	12.0562	21.012	12.1721	17.195	4.94459	13.3791	9.53793	12.0464	16.6849
587.94	7.33456	4.54294	13.9745	5.91965	7.13945	7.73423	11.0989	6.51234	8.22146	12.7146	8.40795	9.53016	5.98117	6.42536	7.15817	12.5686	7.25787	10.8669	10.4369	17.8368	11.1538	22.2982	13.6106	14.6137	2.6299	13.9593	6.78718	12.887	17.0413
