# Supplementary material for: A next-generation fluorescent chemosensor for dual-mode detection of aluminium ions and DCP: a bridge between sensing and bio-imaging
Source: Royal Society of Chemistry journal article supplement (doi:10.1039/d5tc04533a), 2026-01-01
Supplement: d5tc04533a2.pdf [file d5tc04533a2.pdf]

## **Next-Generation Fluorescent Chemosensor for Dual-Mode Detection of Aluminium Ions and DCP: A Bridge Between Sensing and Bio-imaging**

Saurabh Gupta<sup>a§</sup>, Abhishek Kaundal<sup>b§</sup>, Gulshan Kumar<sup>c</sup>, Vijay Luxami<sup>b\*</sup>, Kamaldeep Paul<sup>a,b\*</sup>

<sup>a</sup>TIET-VT, Centre of Excellence in Emerging Materials, Thapar Institute of Engineering and Technology, Patiala, Punjab, India-147004

<sup>b</sup>Department of Chemistry and Biochemistry, Thapar Institute of Engineering and Technology,

Patiala-147001, India

<sup>c</sup>Department of Chemistry, Banasthali University, Banasthali Newai 304022, Rajasthan, India

\*Email: [kpaul@thapar.edu](mailto:kpaul@thapar.edu) , [vluxami@thapar.edu](mailto:vluxami@thapar.edu)

§ Equally Contributed

## Materials and methods

### Binding constant and limit of detection

The binding constants were determined with Benesi-Hildebrand equation, and the limit of detections were calculated with the help of a standardized IUPAC equation.

$$\frac{1}{I-I_o} = \frac{1}{K_a (I_{\max} - I_o)[C]^n} + \frac{1}{I_{\max} - I_o}$$

Where,

$I_o$  = Intensity of probe in the absence of analyte

$I$  = Intensity of probe at an intermediate analyte concentration

$I_{\max}$  = Intensity of probe at a saturation

$C$  = Concentration of analyte,

$K_a$  = Binding constant

The detection limit (DL) was calculated from the following equation:

$$DL = \frac{3 \times \text{standard deviation of blank solution}}{\text{slope of calibration curve}}$$

### Quantum Yield

We have calculated the fluorescence quantum yield of **BINNA** in the absence and presence of  $Al^{3+}$  ions and DCP using fluorescein as a standard, with a quantum yield of 0.54 (0.1M  $H_2SO_4$ ) and phenanthrene with a quantum yield of 0.13 (cyclohexane). The formula used is as follows

$$\Phi_S = \Phi_R \times \frac{A_S}{A_R} \times \frac{(Abs)_R}{(Abs)_S} \times \frac{\eta_S}{\eta_R}$$

Where  $\Phi_S$  is the quantum yield of sample to be tested,  $\Phi_R$  is the quantum yield of the fluorescein;  $A_S$  and  $A_R$  are the emission band areas of tested sample and fluorescein,  $(Abs)_S$  and  $(Abs)_R$  are the maximum absorbance values of the tested sample and fluorescein;  $\eta_S$  and  $\eta_R$  are the refractive index of the solvent used for the sample and fluorescein to record emission band.

### Sample preparation for DLS studies

The prepared stock solution was filtered to remove the suspended particles with the help of 0.02  $\mu$ M filter. Zeta potential analyser (ZEN 3600) was used for conducting DLS experiment. The solution having a concentration of 20  $\mu$ M was prepared to determine the hydrodynamic size of the particles.

### Field Emission-Scanning Electron Microscopy (FE-SEM) measurement

The effect of aggregation has been explored by measuring the changes in particle size and surface morphology using FE-SEM imaging. The **BINNA** solution was placed on a cover slip by drop cast method and allowed to dry for 24 h. The dried sample was subsequently plated with gold spray and FE-SEM analysis was performed. ZEISS MERLIN Compact FE-SEM was used to perform the experiment.

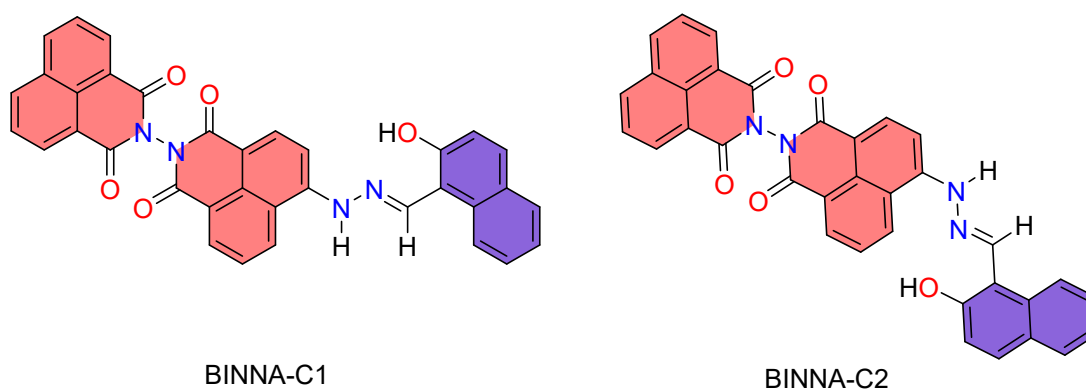

**Figure S1:** Possible conformations of probe **BINNA**

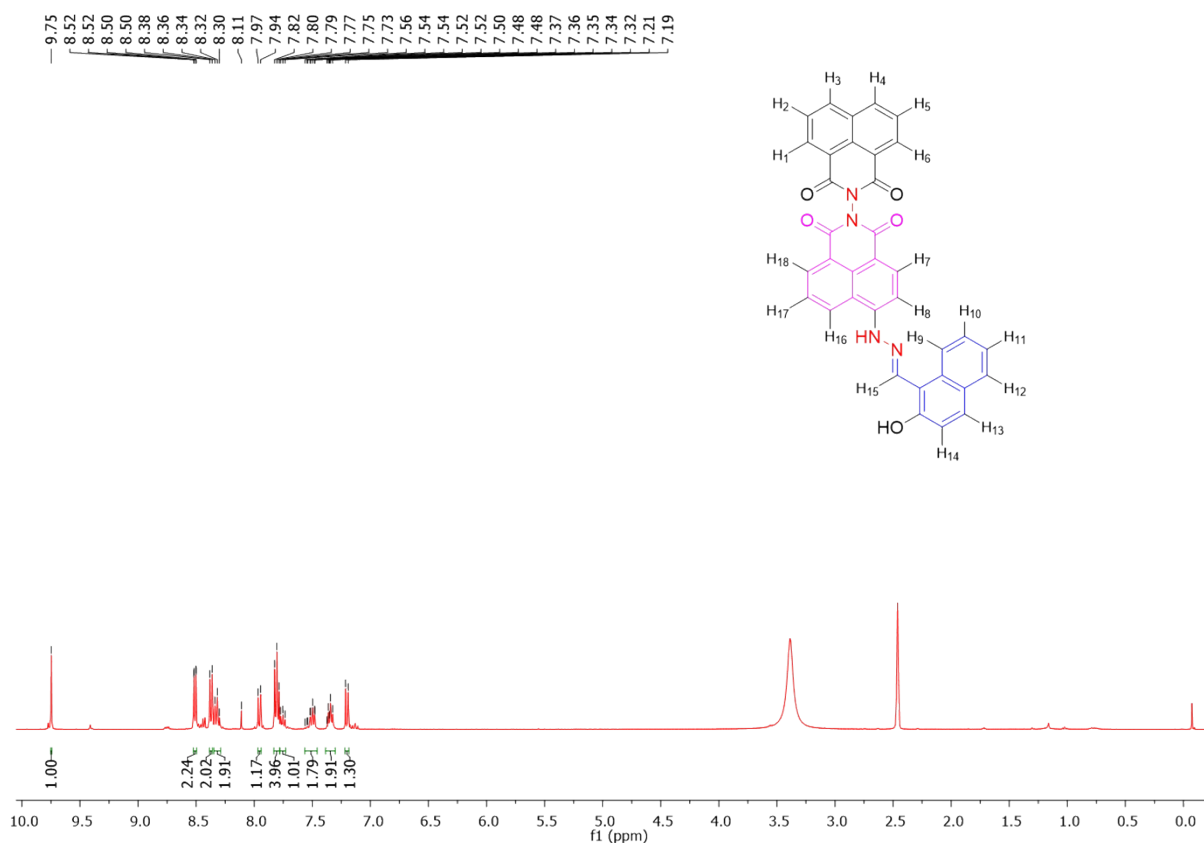

**Figure S2:** <sup>1</sup>H NMR spectrum (DMSO-*d*<sub>6</sub>) of (*E*)-6-(2-((2-hydroxynaphthalen-1-yl)methylene)hydrazinyl)-1*H*,1'*H*,3*H*,3'*H*-[2,2'-bibenzo[*de*]isoquinoline]-1,1',3,3'-tetraone

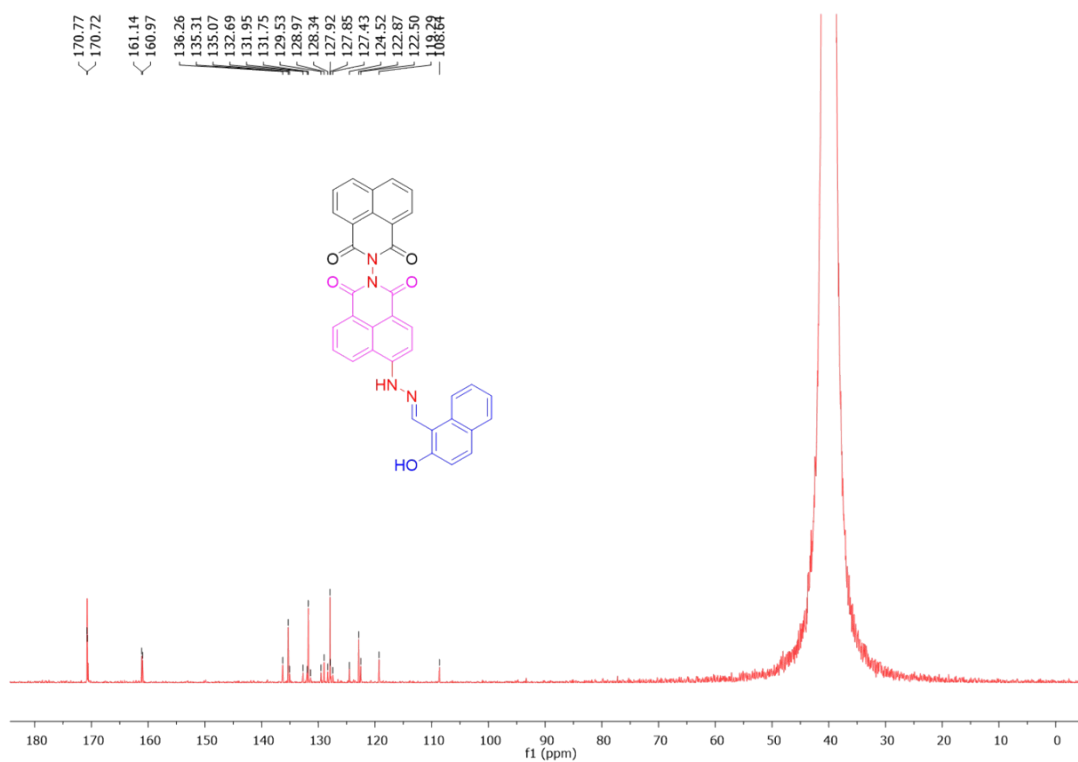

**Figure S3:** <sup>13</sup>C NMR spectrum (DMSO-*d*<sub>6</sub>) of (*E*)-6-(2-((2-hydroxynaphthalen-1-yl)methylene)hydrazinyl)-1*H*,1'*H*,3*H*,3'*H*-[2,2'-bibenzo[*de*]isoquinoline]-1,1',3,3'-tetraone

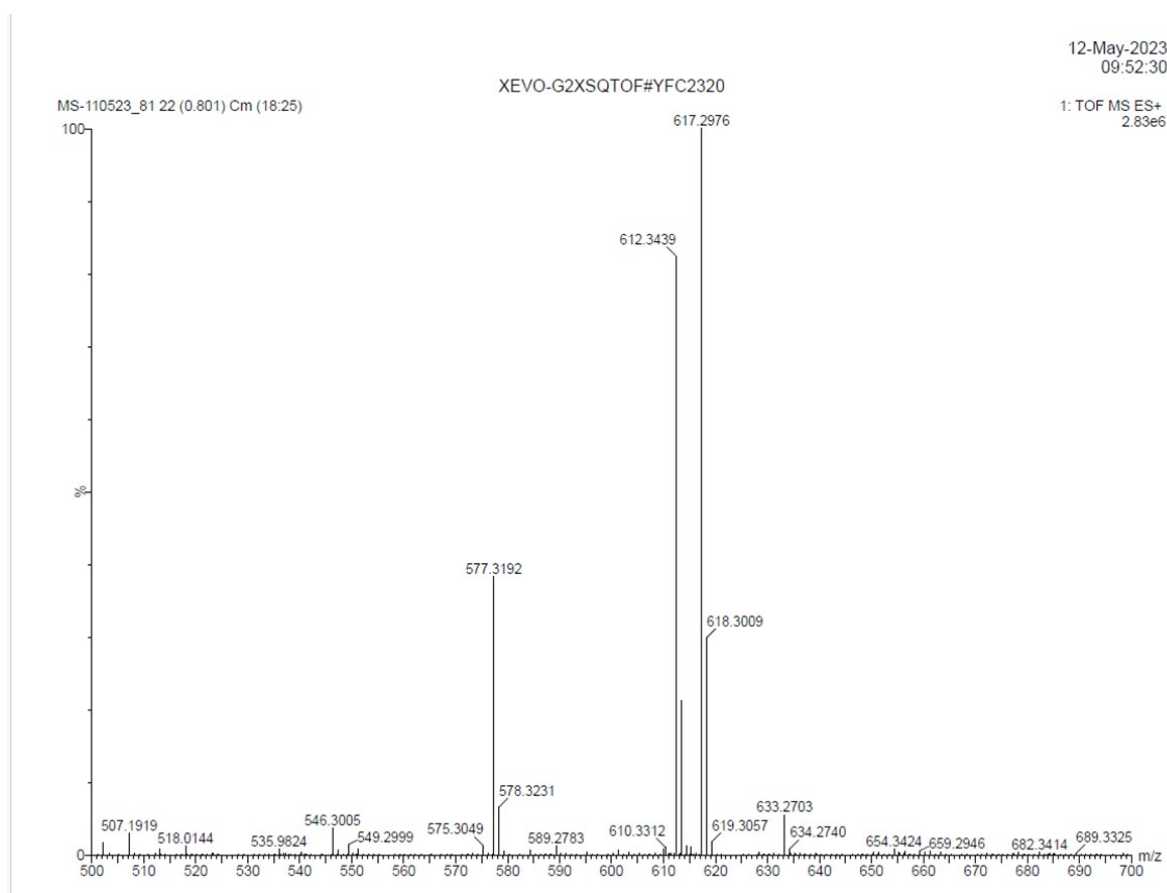

**Figure S4:** HRMS spectrum of BINNA

## Efficiency of BINNA

**BINNA** effectiveness and efficacy in detecting  $\text{Al}^{3+}$  ions and DCP were contrasted with those of previously published  $\text{Al}^{3+}$  and DCP sensors (**Table S1**). Based on this data, it is evident that **BINNA** offers a number of benefits over the reported sensors, as it can detect both  $\text{Al}^{3+}$  and DCP, including a "Turn-On" sensor with better detection limits compared to other reported chemosensors.

**Table S1:** Comparison of the present sensor with known sensors

| S. No. | Sensor                                                                              | Solvent System                                           | Ion Detected     | LOD                 | Application                | Ref |
|--------|-------------------------------------------------------------------------------------|----------------------------------------------------------|------------------|---------------------|----------------------------|-----|
| 1      | 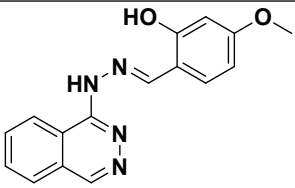   | $\text{H}_2\text{O}$                                     | $\text{Al}^{3+}$ | 0.022 $\mu\text{M}$ | Flexible and foldable film | 1   |
| 2      |   | $\text{C}_2\text{H}_5\text{OH}:\text{H}_2\text{O}$ (7:3) | $\text{Al}^{3+}$ | 0.098 $\mu\text{M}$ | Test strip and Logic gates | 2   |
| 3      |  | HEPES buffer                                             | $\text{Al}^{3+}$ | 0.082 $\mu\text{M}$ | Test strip                 | 3   |
| 4      |  | MeOH                                                     | $\text{Al}^{3+}$ | 0.15 $\mu\text{M}$  | Test strip and logic gates | 4   |

|    |                                                                                     |                                       |                  |             |                                     |    |
|----|-------------------------------------------------------------------------------------|---------------------------------------|------------------|-------------|-------------------------------------|----|
| 5  | 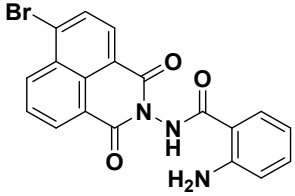   | DMSO:H <sub>2</sub> O<br>(1:1 v/v)    | Al <sup>3+</sup> | 15.2<br>μM  | Cell imaging                        | 5  |
| 6  |    | DMSO:H <sub>2</sub> O<br>(1:1 v/v)    | Al <sup>3+</sup> | 0.033<br>μM | Pharmaceutical samples              | 6  |
| 7  |    | MeOH                                  | Al <sup>3+</sup> | 0.79<br>μM  | Cell imaging and smartphone         | 7  |
| 8  |    | CH <sub>3</sub> CN:HEPES<br>(1:1 v/v) | Al <sup>3+</sup> | 1.88<br>μM  | Cell imaging                        | 8  |
| 9  |  | THF:H <sub>2</sub> O<br>(1:1 v/v)     | Al <sup>3+</sup> | 3.15 μM     | Real Sample analysis and bioimaging | 9  |
| 10 |  | MeOH: HEPES<br>(6:4)                  | Al <sup>3+</sup> | 12.6<br>μM  | Smartphone and test kit             | 10 |
| 11 |  | CHCl <sub>3</sub>                     | DCP              | 23.31<br>nM | Test strip and Bioimaging           | 11 |
| 12 |  | CH <sub>3</sub> CN                    | DCP              | 0.36<br>μM  | Real Sample analysis                | 12 |

|    |                                                                                     |                                              |     |            |                                            |    |
|----|-------------------------------------------------------------------------------------|----------------------------------------------|-----|------------|--------------------------------------------|----|
| 13 | 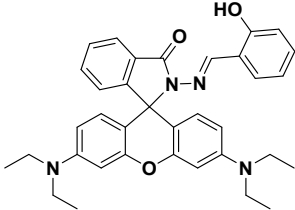   | DMSO:H <sub>2</sub> O<br>(6:4)               | DCP | 0.16<br>μM | Paper strip,<br>smartphone<br>analysis     | 13 |
| 14 |    | DMSO                                         | DCP | 7.4 μM     | Smartphone and<br>paper strip              | 14 |
| 15 |    | DMF                                          | DCP | 5.5 nM     | Paper strip                                | 15 |
| 16 |    | CH <sub>3</sub> CN                           | DCP | 1.54<br>μM | Paper strip                                | 16 |
| 17 |   | DMSO:H <sub>2</sub> O<br>(1:1)               | DCP | 0.36<br>μM | Paper strip                                | 17 |
| 18 |  | DMSO                                         | DCP | 0.42<br>μM | Paper strip and<br>Real sample<br>analysis | 18 |
| 19 |  | CH <sub>3</sub> CN                           | DCP | 0.3 μM     | Test strip and<br>real sample<br>analysis  | 19 |
| 20 |  | CH <sub>3</sub> CN:H <sub>2</sub> O<br>(9:1) | DCP | 12.2<br>nM | Paper Strip                                | 20 |

|    |                                                                                   |      |                           |                                                                |                                                      |              |
|----|-----------------------------------------------------------------------------------|------|---------------------------|----------------------------------------------------------------|------------------------------------------------------|--------------|
| 21 | 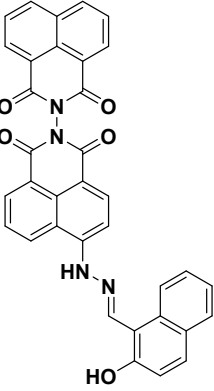 | MeOH | Al <sup>3+</sup> ,<br>DCP | 18.2<br>nM<br>(0.0182<br>μM)<br>and 8.5<br>nM<br>(0.008<br>μM) | Cell Imaging,<br>Logic gate, Real<br>sample analysis | This<br>work |
|----|-----------------------------------------------------------------------------------|------|---------------------------|----------------------------------------------------------------|------------------------------------------------------|--------------|

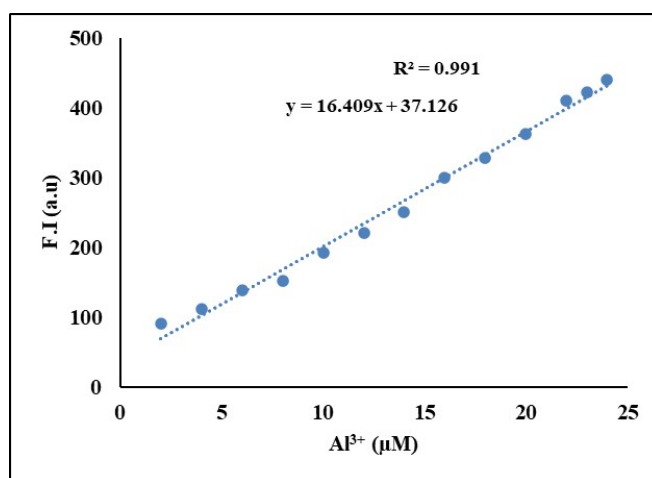

**Figure S5:** Determination of limit of detection for **BINNA** towards Al<sup>3+</sup> ions.

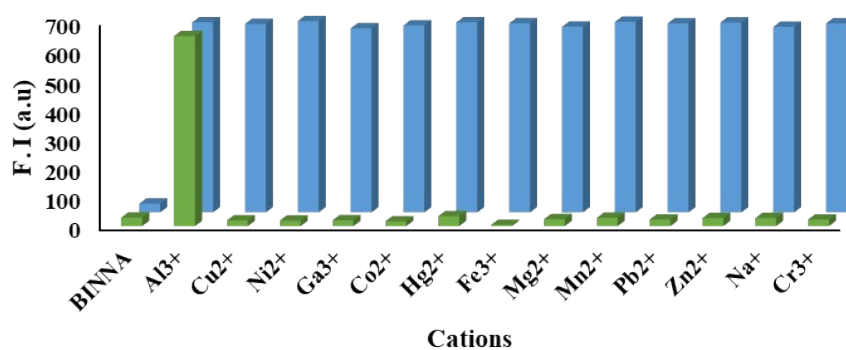

**Figure S6:** The relative intensity of **BINNA** at 450 nm in the presence and absence of Al<sup>3+</sup> ions (10 μM), while considering various competing metal ions (50 μM). The change in emission intensity of **BINNA** with different metal ions was represented by green bars, whereas blue bars represent the changes in emission intensity of **BINNA** in the presence of Al<sup>3+</sup> ions and different competing ions



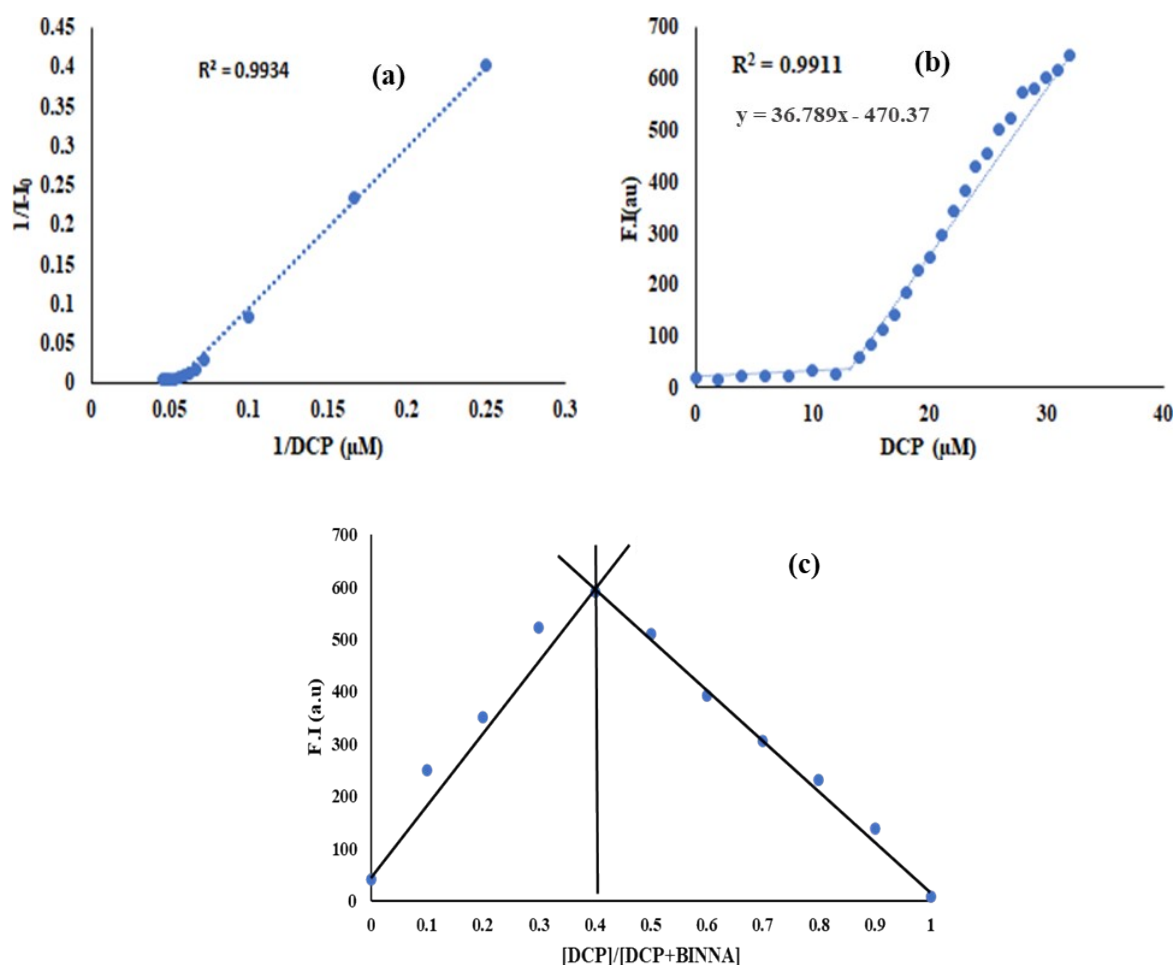

**Figure S7:** (a) Calculation of binding constant for **BINNA** towards DCP using the Benesi-Hildebrand equation, (b) Determination of limit of detection for **BINNA** towards DCP ions. (c) Job's plot for calculating the stoichiometry of **BINNA** and DCP using fluorescence spectra.

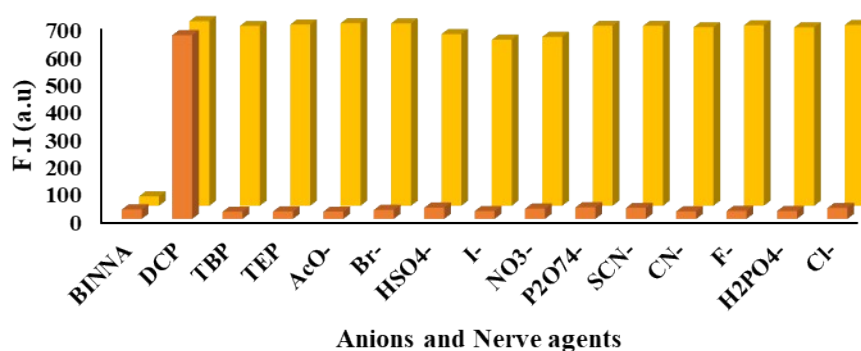

**Figure S8:** Relative intensity of **BINNA** at 371 nm in the presence and absence of DCP (10  $\mu M$ ) with several anions (50  $\mu M$ ). The fluorescence intensity change of **BINNA** with different anions and nerve agents is represented by orange bars, and yellow bars represent **BINNA**-DCP in the presence of different competing ions and nerve agents.

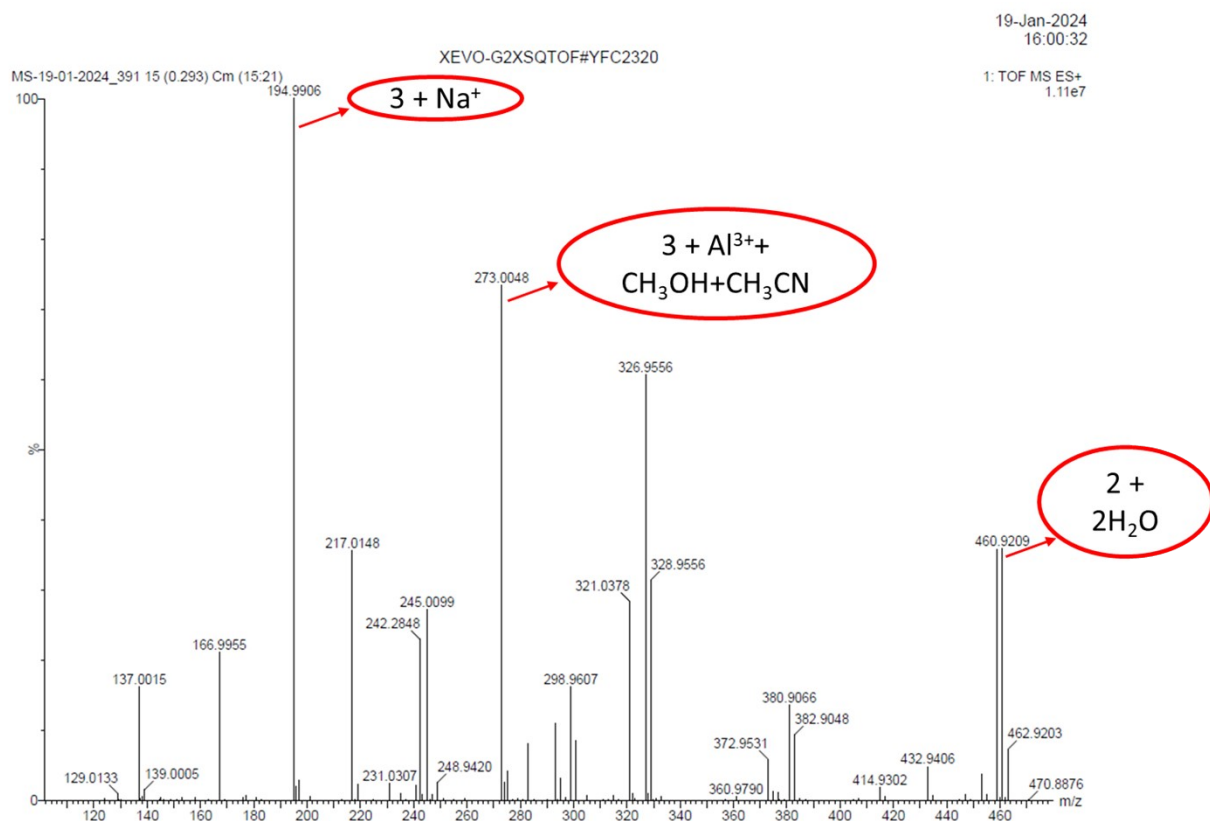

**Figure S9:** HRMS spectrum of **BINNA** in the presence of  $\text{Al}^{3+}$  ions

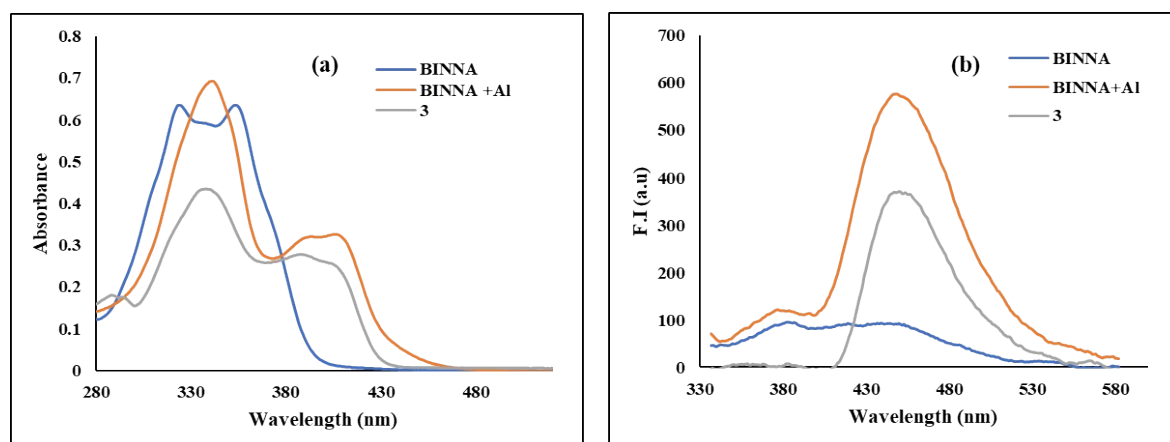

**Figure S10:** (a) Absorption and (b) emission spectra of **BINNA**, **BINNA**+ $\text{Al}^{3+}$  and **3**

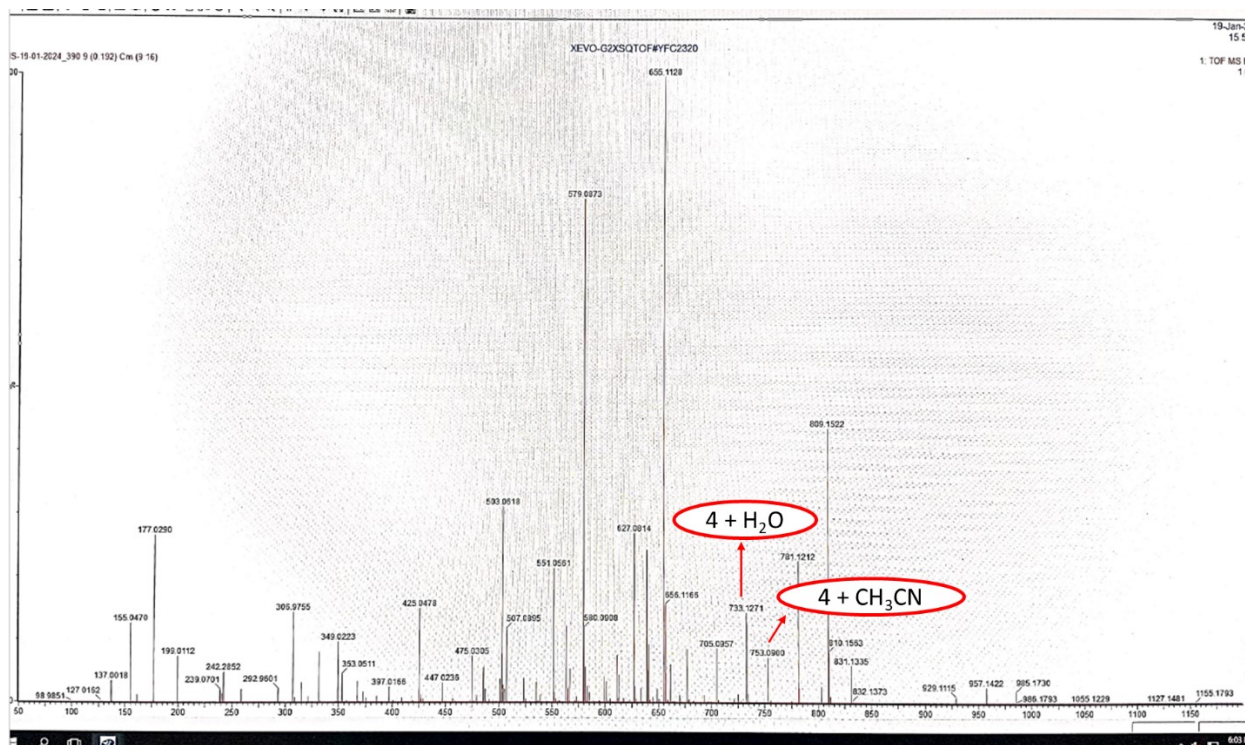

**Figure S11:** HRMS spectrum of **BINNA** in the presence of DCP

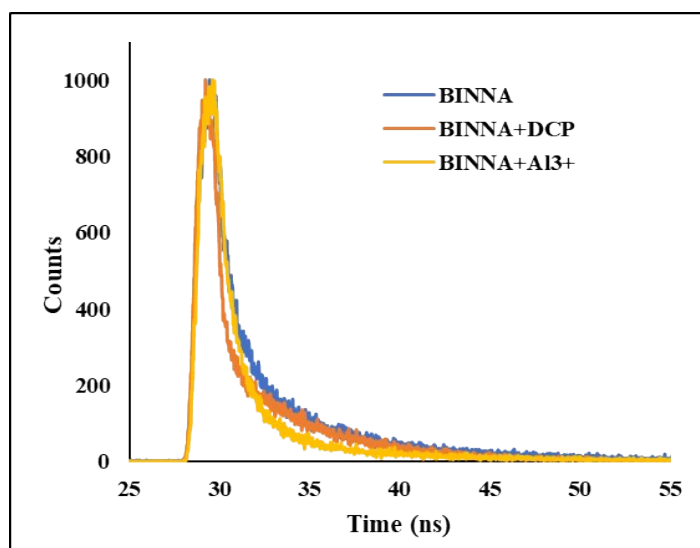

**Figure S12:** Time-resolved spectra of **BINNA** ( $\text{CH}_3\text{OH}$ ) in the absence and presence of DCP and  $\text{Al}^{3+}$  ions.

**Table S2:** Calculated electronic spectra of **BINNA** in different solvents

|          |            | Absorption<br>peak ( $\lambda$ ; nm) | Oscillation<br>strength (f) | Dipole<br>moment<br>(a.u.) |
|----------|------------|--------------------------------------|-----------------------------|----------------------------|
| Solvents | Chloroform | 392                                  | 1.1576                      | 4.52                       |
|          | MeOH       | 397                                  | 1.1692                      | 5.33                       |
|          | DMSO       | 399                                  | 1.1854                      | 5.38                       |
|          | Acetone    | 393                                  | 1.1418                      | 4.96                       |

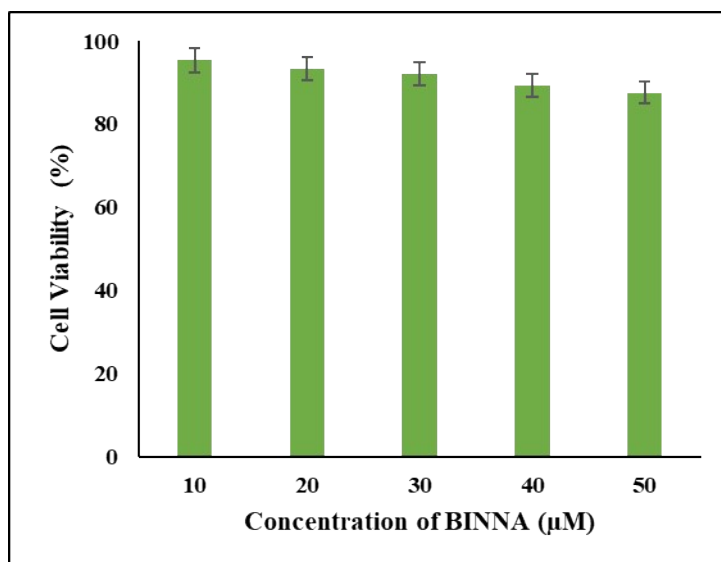

**Figure S13:** Cell viability of *E. coli* cells incubated with **BINNA** with different concentration (10, 20, 30, 40 and 50 μM) for 24h

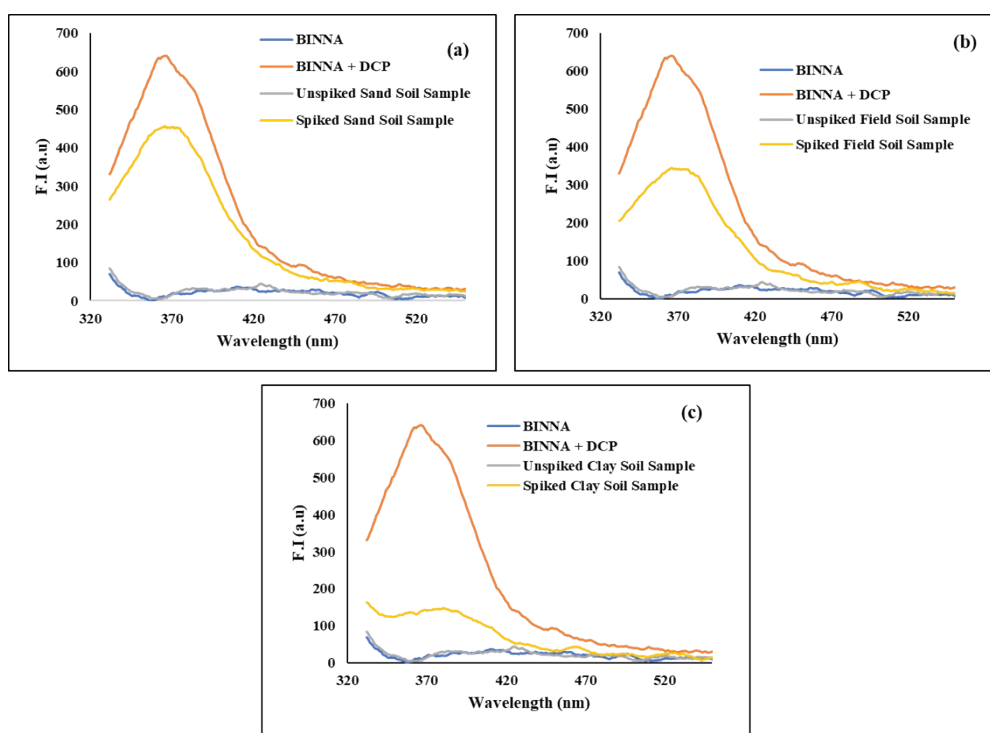

**Figure S14:** Emission spectra of **BINNA** solution in different spiked and unspiked DCP soil samples such as (a) sand, (b) field, and (c) clay soil.

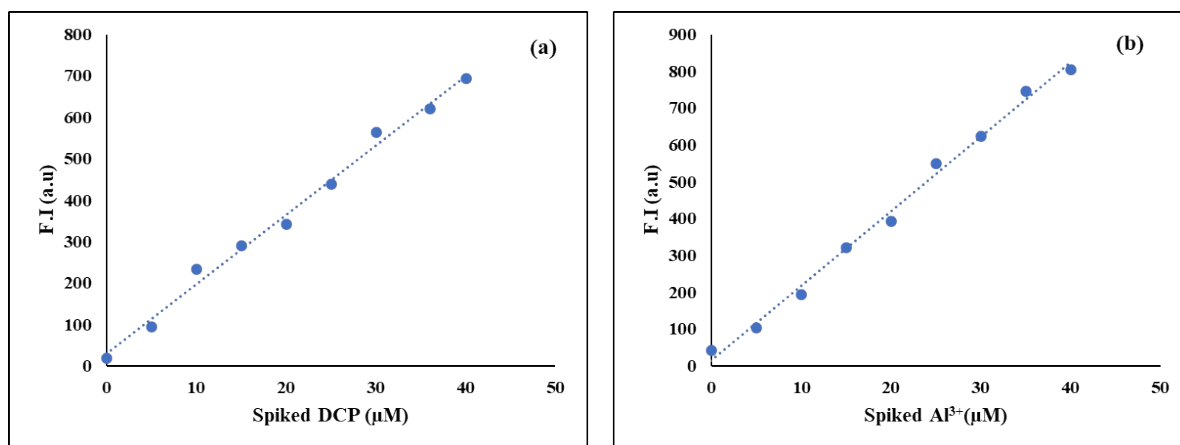

**Figure S15:** Calibration curve for (a) DCP and (b) Al<sup>3+</sup> ions.

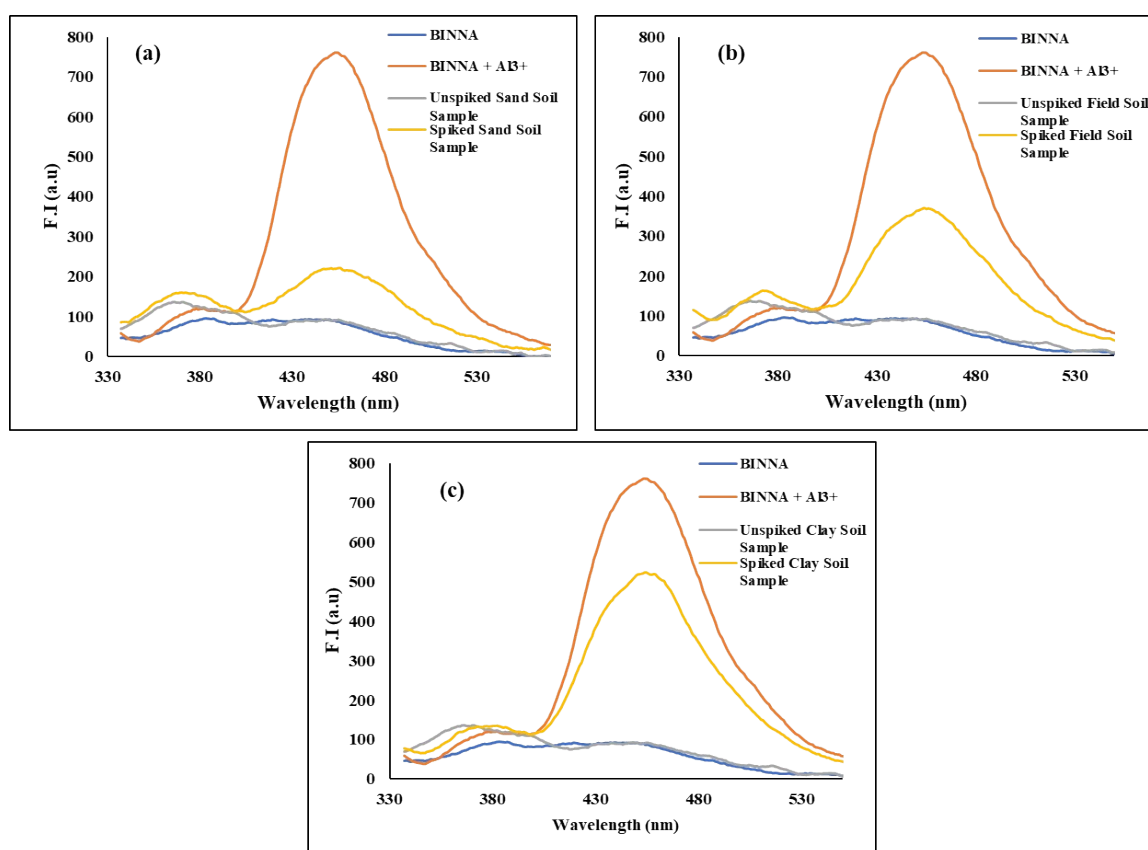

**Figure S16:** Emission spectra of BINNA solution in different Al<sup>3+</sup> spiked and unspiked soil samples such as (a) sand, (b) field, and (c) clay soil

## References

1. Yang, Y. Y.; Ma, P. Y.; Xue, J. H.; Yang, D. D.; Shi, Y. S.; Zhao, X.; Ma, Q. A Highly Selective Fluorescent Probe Based on Multi-Binding Site Hydrazone Chemosensor for Al<sup>3+</sup> Detection. *Microchem. J.* **2024**, *200*, 110495.

2. Biswal, B.; Bihari Bhoi, B.; Charan Behera, K.; Khamari, U.; Bag, B. A Rhodamine B Based Chemosensor for Selective Detection of  $\text{Al}^{3+}$  Ion: Photophysical Investigations and Analysis in Real Samples. *Inorg. Chim. Acta* **2024**, *571*, 122225.
3. Shaikh, A.; Shaikh, J.; Ansari, D.; Sheikh, K. N.; Tambe, P.; Shaikh, S.; Lande, D. N.; Gejji, S. P.; Ahmed, K. A ‘Turn-on’ Fluorescence Sensor Based on 5-Methoxy Salicylaldehyde Hydrazone for Selective Detection of  $\text{Al}^{3+}$  Ions. *J. Mol. Struct.* **2025**, *1328*, 141317.
4. Li, N. N.; Zeng, S.; Li, M. Q.; Ma, Y. Q.; Sun, X. J.; Xing, Z. Y.; Li, J. L. A Highly Selective Naphthalimide-Based Chemosensor: “Naked-Eye” Colorimetric and Fluorescent Turn-On Recognition of  $\text{Al}^{3+}$  and Its Application in Practical Samples, Test Paper and Logic Gate. *J. Fluoresc.* **2018**, *28*, 347–357.
5. Anand, T.; Ashok Kumar, S. K.; Sahoo, S. K. A New  $\text{Al}^{3+}$  Selective Fluorescent Turn-on Sensor Based on Hydrazide-Naphthalic Anhydride Conjugate and Its Application in Live Cells Imaging. *Spectrochim. Acta - Part A Mol. Biomol. Spectrosc.* **2018**, *204*, 105–112.
6. Saha, S.; Mondal, S.; Sahoo, P. Fabrication of a Luminescent Chemosensor for Selective Detection of  $\text{Al}^{3+}$  Used as an Adjuvant in Pharmaceutical Drugs. *Org. Biomol. Chem.* **2022**, *21*, 981–986.
7. Zhang, Q.; Zhang, D.; Shi, Z.; Jin, C.; Jiang, Y. Construction of Naphthalimide-Based Fluorescent Probe for Sequential Detection of  $\text{Al}^{3+}$  and NOR and Its Application in Tea and Honey. *Spectrochim. Acta - Part A Mol. Biomol. Spectrosc.* **2025**, *330*, 125685.
8. Gauthama, B. U.; Narayana, B.; Sarojini, B. K.; Srijana, P. J.; Kodlady, S. N.; Sangappa, Y.; Kudva, A. K.; Raghu, S. V. A Hybrid Fluorescent Probe for the Selective Detection of Divalent  $\text{Hg}^{2+}$  and Trivalent  $\text{Al}^{3+}$  Ions and Their Biological Applications. *Results Chem.* **2024**, *8*, 101591.
9. Suresh, S.; Prabakaran, G.; Prabhu, J.; Vijayanand, P. S.; Kumar, R. S.; Karthick, R.; Velraj, G.; Nandhakumar, R. A Pyridine Naphthalene Conjugate: ESIPT Based Molecular Chemosensor for  $\text{Al}^{3+}$  Ions and Sequential Detection of  $\text{H}_2\text{PO}_4^-$  and Applications in Milk, Water Samples and Bio-Imaging. *J. Food Compos. Anal.* **2024**, *132*, 106364.
10. Guctekin Yasar, O.; Karuk Elmas, S. N.; Aydin, D.; Arslan, F. N.  $\text{Al}^{3+}$  Selective Ratiometric Fluorescent and Colorimetric Chemoprobe and Its Practical Applications in Foods, Test Kits and Smartphone. *J. Photochem. Photobiol. A Chem.* **2024**, *447*, 115238.

11. AbhijnaKrishna, R.; Wu, S. P.; Velmathi, S. On-Spot Detection of Diethylchlorophosphate through Device Fabrication, Pen and Spray Method Based on Intramolecular Charge Transfer Modulated Sensor Molecule Extending Application to Cell Imaging. *Microchem. J.* **2024**, *205*, 111369.
12. Sarkar, P.; Tohora, N.; Mahato, M.; Ahamed, S.; Sultana, T.; Das, S. K. A Selective Chromo-Fluorogenic Chemosensor for Visual Detection of Solution and Vapor Phase of Sarin, Tabun Mimics Diethyl Chlorophosphate, Diethyl Cyanophosphonate. *J. Mol. Struct.* **2024**, *1306*, 137846.
13. Tohora, N.; Ahamed, S.; Mahato, M.; Sultana, T.; Chourasia, J.; Maiti, A.; Das, S. K. Highly Specific and Sensitive Chromo-Fluorogenic Detection of Sarin, Tabun, and Mustard Gas Stimulants: A Multianalyte Recognition Approach. *Photochem. Photobiol. Sci.* **2024**, *23*, 763–780.
14. Sultana, T.; Mahato, M.; Tohora, N.; Ahamed, S.; Maiti, A.; Das, S. K. A Phenanthroimidazole-Based Luminophore for Selective and Specific Identification of Sarin Simulant, Diethylchlorophosphate. *J. Fluoresc.* **2024**, 1625–1636.
15. Xu, H.; Zhang, H.; Zhao, L.; Peng, C.; Liu, G.; Cheng, T. A Naphthalimide-Based Fluorescent Probe for the Highly Sensitive and Selective Detection of Nerve Agent Mimic DCP in Solution and Vapor Phase. *New J. Chem.* **2020**, *44*, 10713–10718.
16. Jain, N.; Kaur, N. Smartphone Coupled, Solution, Solid and Vapour Phase Sensing of Nerve Agent Mimic by 1,8-Naphthalimide Derived Schiff Base. *Results Opt.* **2023**, *12*, 100466.
17. Sultana, T.; Mahato, M.; Ahamed, S.; Tohora, N.; Chourasia, J.; Ali, S.; Das, S. K. A Highly Selective Chromo-Fluorogenic Probe for Specific Detection of Sarin Gas Simulant Diethylchlorophosphate in Liquid and Vapor Phases. *Sens. Diagn.* **2024**, *3*, 1285–1297.
18. Sultana, T.; Mahato, M.; Tohora, N.; Ahamed, S.; Maiti, A.; Ghanta, S.; Das, S. K. A Benzoxazole-Triphenylamine Conjugated Fluorogenic Probe for Specific Detection of Sarin Gas Mimic Diethylchlorophosphate. *Anal. Methods* **2024**, *16*, 759–771.
19. Mahato, M.; Sultana, T.; Maiti, A.; Ahamed, S.; Tohora, N.; Ghanta, S.; Das, S. K. Highly Selective and Sensitive Chromogenic Recognition of Sarin Gas Mimicking Diethylchlorophosphate. *Anal. Methods* **2024**, *16*, 1371–1382.
20. Banerjee, S.; Ghosh, P.; Karak, A.; Banik, D.; Mahapatra, A. K. A Chemodosimetric Chemosensor for the Ratiometric Detection of Nerve Agent-Mimic DCP in Solution and Vapor Phases. *Anal. Methods* **2024**, 432–439.
